# Supplementary material for: Diverse structural reactivity patterns of a POCOP ligand with coinage metals
Source: Royal Society of Chemistry journal article supplement (doi:10.1039/d3dt03921h), 2024-01-01
Supplement: d3dt03921h1.pdf [file d3dt03921h1.pdf]

# Supporting Information

*for*

## **Diverse Structural Reactivity Pattern of a POCOP Ligand with Coinage Metals**

Moushakhi Ghosh<sup>a</sup>, Nasrina Parvin<sup>b</sup>, Prakash Panwar<sup>a</sup>, Srinu Tothadi<sup>c</sup>, Rangarajan  
Bakthavatsalam<sup>c</sup>, Arshad Therambram<sup>a</sup>, Shabana Khan<sup>a\*</sup>

<sup>a</sup>Department of Chemistry, Indian Institute of Science Education and Research Pune, Dr. Homi Bhabha Road, Pashan, Pune-411008, India.

<sup>b</sup>CSIR-Central Salt and Marine Chemicals Research Institute, Gijub Badheka Marg, Bhavnagar-364002, India

<sup>c</sup>Indian Institute of Science Education and Research (IISER) Tirupati, Tirupati, India

\*Corresponding author. E-mail: [shabana@iiserpune.ac.in](mailto:shabana@iiserpune.ac.in)

### **Contents**

**S1.** Experimental Details

**S2.** NMR Data for **2-12**

**S3.** Crystallographic details of **2-12**

**S4.** Photophysical Data

**S5.** Powder X-Ray Diffraction (PXRD) patterns of complex **2-4, 6** and **12**

**S6.** Mass Spectrometric Data for complexes **2-12**

**S7.** Quantum Chemical Calculation for Complexes **2-4, 6, 7, 11,** and **12**



## S1. Experimental Details

All experiments were carried out under an atmosphere of dry argon or in vacuo using a standard Schlenk technique and in a dinitrogen filled MBRAUN MB 150-G1 glovebox. The solvents used were purified by an MBRAUN solvent purification system MB SPS-800. All other chemicals purchased from Aldrich were used without further purification.  $^1\text{H}$ ,  $^{13}\text{C}$ ,  $^{19}\text{F}$  and  $\text{BF}_3 \cdot \text{OEt}_2$  for  $^{11}\text{B}$  NMR spectra were recorded with the Bruker 400 MHz spectrometer, using  $\text{CDCl}_3$  and  $\text{DMSO-}d_6$  as a solvent with an external standard ( $\text{SiMe}_4$  for  $^1\text{H}$ ,  $^{13}\text{C}$ ; 85%  $\text{H}_3\text{PO}_4$  for  $^{31}\text{P}$  and  $\text{CHF}_3$  for  $^{19}\text{F}$ ).

### ❖ Synthesis of 1

We modified the existing procedure. 4,6-di-*tert*-butyl resorcinol (3.33 g, 15 mmol) was taken in a 100ml schlenk flask and was made soluble in 50 ml anhydrous diethyl ether. 12 ml *n*-BuLi (2.5 M in *n*-Hexane) was added slowly dropwise to the reaction mixture at  $-78^\circ\text{C}$  and stirred for 4 hrs at room temperature. Diphenylchlorophosphine ( $\text{PPh}_2\text{Cl}$ ) (5.55 ml, 30 mmol) was added to the reaction mixture at  $-78^\circ\text{C}$ . After overnight stirring at room temperature, LiCl was precipitated out from the reaction mixture and was filtered off. The solvent was evaporated, and the oily residue was made soluble in excess *n*-hexane, which afforded colourless crystals. Yield: 6.2 g (70%). The  $^1\text{H}$ ,  $^{31}\text{P}$ , and  $^{13}\text{C}$  matched well with previously reported literature.<sup>1</sup>

### ❖ Synthesis of 2

**1** (0.295 g, 0.5 mmol) and CuCl (0.067 g, 0.5 mmol) were taken in a flask, and 40 mL of DCM was added to the reaction mixture. After overnight stirring at room temperature, the reaction was filtered off. The colourless crystals suitable for X-ray analysis were obtained from a dichloromethane and *n*-pentane mixture after 1 day at room temperature. Yield: 450 mg (65 %).  $^1\text{H}$  NMR (400 MHz,  $\text{CDCl}_3$ , 298K):  $\delta$  1.15 (s, 36H,  $\text{CMe}_3$ ), 7.02-7.04 (m, 16H, aromatic CH), 7.12 (s, 2H, aromatic CH), 7.13-7.26 (m, 8H, aromatic CH), 7.32-7.33 (m, 16H, aromatic CH), 8.20 (s, 2H, aromatic CH) ppm.  $^{13}\text{C}\{^1\text{H}\}$  NMR (100.6 MHz,  $\text{CDCl}_3$ , 298K):  $\delta$  29.40 ( $\text{CMe}_3$ ), 33.30 ( $\text{CMe}_3$ ), 110.72 (resorcinylic aromatic CH, ortho), 123.65 (resorcinylic aromatic CH, meta), 126.80, 127.25, 128.85, 129.18, 130.35, 130.45, 130.97, 131.01, 131.05, 131.09, 134.79, 149.79, 150.57 ppm.  $^{31}\text{P}\{^1\text{H}\}$  NMR (161.976 MHz,  $\text{CDCl}_3$ , 298 K):  $\delta$  90.74, 92.88 ppm. Mp:  $266.9^\circ\text{C}$ . MALDI TOF:  $\text{C}_{76}\text{H}_{80}\text{Cu}_2\text{Cl}_2\text{O}_4\text{P}_4$ :  $m/z$  1379.342 Found  $m/z$ : 689.0856 (for  $\text{C}_{38}\text{H}_{40}\text{CuClO}_2\text{P}_2$ ) (Monomer)

### ❖ Synthesis of 3

**1** (0.295 g, 0.5 mmol) and CuBr (0.14 g, 1 mmol) were taken in a flask, and 40 mL of DCM was added to the reaction mixture. After overnight stirring at room temperature, the reaction was filtered off. The colourless crystals suitable for X-ray analysis were obtained from a dichloromethane and n-pentane mixture after a few days at room temperature. Yield: 700 mg (80 %).  $^1\text{H}$  NMR (400 MHz,  $\text{CDCl}_3$ , 298K):  $\delta$  1.12 (s, 36H,  $\text{CMe}_3$ ), 6.99-7.05 (m, 16H, aromatic CH), 7.09 (s, 2H, aromatic CH), 7.18-7.24 (m, 8H, aromatic CH), 7.28-7.34 (m, 16H, aromatic CH), 8.20 (s, 2H, aromatic CH) ppm.  $^{13}\text{C}\{^1\text{H}\}$  NMR (100.6 MHz,  $\text{CDCl}_3$ , 298K):  $\delta$  29.40 ( $\text{CMe}_3$ ), 33.29 ( $\text{CMe}_3$ ), 111.81 (resorcinylic aromatic CH, ortho), 123.72 (resorcinylic aromatic CH, meta), 126.74, 127.20, 128.88, 129.22, 131.16, 131.20, 131.24, 131.29, 134.67, 134.73, 134.79, 149.61, 150.42 ppm.  $^{31}\text{P}\{^1\text{H}\}$  NMR (161.976 MHz,  $\text{CDCl}_3$ , 298 K):  $\delta$  91.40 ppm. Mp: 205.0 °C. ESI MS:  $\text{C}_{76}\text{H}_{80}\text{Cu}_4\text{Br}_4\text{O}_4\text{P}_4$ : m/z 1755.142 Found m/z: 1755.5341

#### ❖ Synthesis of 4

**1** (0.295 g, 0.5 mmol) and CuI (0.19 g, 1 mmol) were taken in a flask, and 40 mL of DCM was added to the reaction mixture. After overnight stirring at room temperature, the reaction was filtered off. The colourless crystals suitable for X-ray analysis were obtained from a dichloromethane and n-pentane mixture at room temperature. Yield: 650 mg (67 %).  $^1\text{H}$  NMR (400 MHz,  $\text{CDCl}_3$ , 298K):  $\delta$  1.15 (s, 36H,  $\text{CMe}_3$ ), 7.02-7.04 (m, 16H, aromatic CH), 7.11 (s, 2H, aromatic CH), 7.21 (m, 8H, aromatic CH), 7.33 (m, 16H, aromatic CH), 8.20 (s, 2H, aromatic CH) ppm.  $^{13}\text{C}\{^1\text{H}\}$  NMR (100.6 MHz,  $\text{CDCl}_3$ , 298K):  $\delta$  29.50 ( $\text{CMe}_3$ ), 33.29 ( $\text{CMe}_3$ ), 113.39 (resorcinylic aromatic CH, ortho), 124.02 (resorcinylic aromatic CH, para), 126.65, 127.20, 128.94, 131.59, 134.51, 149.10 ppm.  $^{31}\text{P}\{^1\text{H}\}$  NMR (161.976 MHz,  $\text{CDCl}_3$ , 298 K):  $\delta$  92.9 ppm. Mp: 255.4 °C MALDI TOF:  $\text{C}_{76}\text{H}_{80}\text{Cu}_4\text{I}_4\text{O}_4\text{P}_4$ : m/z 1943.146 Found m/z: 1980.4334 (for M+K-2)

#### ❖ Synthesis of 5

**1** (0.295 g, 0.5 mmol) and CuOTf.toluene (0.516 g, 1 mmol) were taken in a flask, and 40 mL of DCM was added to the reaction mixture. After overnight stirring at room temperature, the reaction was filtered off. The colourless crystals suitable for X-ray analysis were obtained from a dichloromethane and n-pentane mixture at room temperature. Yield: 520 mg (51 %).  $^1\text{H}$  NMR (400 MHz,  $\text{CDCl}_3$ , 298K):  $\delta$  1.17 (s, 36H,  $\text{CMe}_3$ ), 6.29 (s, 2H, aromatic H), 7.22-7.28 (m, 16H, phenyl H), 7.29 (s, 2H, aromatic H), 7.32-7.37 (m, 8H, phenyl H), 7.45-7.53 (m, 16H, phenyl H) ppm.  $^{31}\text{P}\{^1\text{H}\}$  NMR (161.976 MHz,  $\text{CDCl}_3$ , 298 K):  $\delta$  98.28 ppm. Mp: 207.6 °C MALDI TOF:  $\text{C}_{80}\text{H}_{80}\text{Cu}_4\text{F}_{12}\text{O}_{16}\text{P}_4\text{S}_4$ : m/z 2031.804 Found m/z: 2031.5327

### ❖ Synthesis of 6

Complex **2** (0.690 g, 0.5 mmol) was made soluble in anhydrous THF, and  $\text{KPPH}_2$  (2 ml in 0.5M solution) was added to the same flask at room temperature. The colour of the reaction instantly changed to bright yellow from colourless. After overnight stirring at room temperature, the reaction was filtered off. The colourless crystals suitable for X-ray analysis were obtained from a THF and toluene mixture at 0°C. Yield: 720 mg (66 %). MALDI TOF:  $\text{C}_{124}\text{H}_{120}\text{Cu}_4\text{O}_4\text{P}_8$ : m/z 2175.4287 Found m/z: 2215.4287

### ❖ Synthesis of 7

**1** (0.59 g, 1 mmol),  $\text{CuBF}_4(\text{ACN})_4$  (0.471 g, 1.5 mmol) and 2-2'-bipyridine (0.396 g, 1.5 mmol) were taken in a flask, and 40 mL of DCM was added to the reaction mixture. After overnight stirring at room temperature, the reaction was filtered off. The colourless crystals suitable for X-ray analysis were obtained from a dichloromethane and diethylether mixture at room temperature. Yield: 710 mg (72 %).  $^1\text{H}$  NMR (400 MHz,  $\text{DMSO-d}_6$ , 298K):  $\delta$  1.09 (s, 36H,  $\text{CMe}_3$ ), 6.42 (m, 2H, aromatic CH), 7.17 (33H, aromatic CH), 7.31(4H, aromatic CH), 7.49 (8H, aromatic CH), 7.61 (5H, aromatic CH), 8.18 (6H, aromatic CH), 8.53 (m, 6H, aromatic CH) ppm,  $^{31}\text{P}\{^1\text{H}\}$  NMR (161.976 MHz,  $\text{CDCl}_3$ , 298 K):  $\delta$  104.8, 94.3, 91.3,  $^{11}\text{B}$  NMR ( $\text{CDCl}_3$ , 128.387 MHz):  $\delta$  0.65 ppm,  $^{19}\text{F}\{^1\text{H}\}$  NMR (376.66 MHz,  $\text{CDCl}_3$ , 298 K): -152.9 ppm. MALDI TOF:  $\text{C}_{106}\text{H}_{104}\text{Cu}_3\text{O}_4\text{P}_4\text{N}_6\text{B}_3\text{F}_{12}$ : m/z 2100.9974 Found m/z: 2215.4287

### ❖ Synthesis of 8

**1** (0.295 g, 0.5 mmol) and AgBr (0.188 g, 1 mmol) were taken in a flask, and 40 mL of DCM was added to the reaction mixture. After overnight stirring at room temperature, the reaction was filtered off. The colourless crystals suitable for X-ray analysis were obtained from a dichloromethane and n-pentane mixture at room temperature. Yield: 690 mg (70 %).  $^1\text{H}$  NMR (400 MHz,  $\text{DMSO-d}_6$ , 298K):  $\delta$  1.21 (s, 36H,  $\text{CMe}_3$ ), 6.27 (s, 2H, aromatic CH), 7.22 (s, 2H, aromatic H), 7.35-7.42 (m, 16H, aromatic CH), 7.45-7.51 (m, 8H, aromatic CH), 7.64-7.72 (m, 16H, aromatic CH) ppm.  $^{31}\text{P}\{^1\text{H}\}$  NMR (161.976 MHz,  $\text{DMSO-d}_6$ , 298 K):  $\delta$  107.24 ppm. Mp: 255.4 °C MALDI TOF:  $\text{C}_{76}\text{H}_{80}\text{Ag}_4\text{Br}_4\text{O}_4\text{P}_4$ : m/z 1932.431 Found m/z: 1932.431 (for  $\text{M}^+$ )

### ❖ Synthesis of 9

**1** (0.295 g, 0.5 mmol) and AgI (0.232 g, 1 mmol) were taken in a flask, and 40 mL of DCM was added to the reaction mixture. After overnight stirring at room temperature, the reaction was filtered off. The colourless crystals suitable for X-ray analysis were obtained from a

dichloromethane and n-pentane mixture at room temperature. Yield: 730 mg (65 %). Mp: 256.1 °C MALDI TOF:  $C_{76}H_{80}Ag_4I_4O_4P_4$ : m/z 2119.7383 Found m/z: 2159.4146 (M+K+1)

#### ❖ Synthesis of 10

**1** (0.59 g, 1 mmol) and  $AgSbF_6$  (0.172 g, 0.5 mmol) were taken in a flask, and 40 mL of DCM was added to the reaction mixture. After overnight stirring at room temperature, the reaction was filtered off. The colourless crystals suitable for X-ray analysis were obtained from a THF and n-pentane mixture after two days at room temperature. Yield: 500 mg (65 %).  $^1H$  NMR (400 MHz, DMSO- $d_6$ , 298K):  $\delta$  1.25 (s, 36H,  $CMe_3$ ), 6.57 (s, 2H, aromatic CH), 7.27 (s, 2H, aromatic CH), 7.40-7.47 (m, 16H, aromatic CH), 7.48-7.57 (m, 24H, aromatic CH) ppm.  $^{13}C\{^1H\}$  NMR (100.6 MHz, DMSO- $d_6$ , 298K):  $\delta$  30.29 ( $CMe_3$ ), 30.62 ( $CMe_3$ ), 34.17 ( $CMe_3$ ), 34.60 ( $CMe_3$ ), 124.99, 129.40, 129.53, 129.64, 129.74, 130.67, 130.83, 130.87, 131.09, 131.14, 131.33, 131.35, 132.01, 132.34, 132.89, 132.92, 153.04, 154.20 ppm.  $^{31}P\{^1H\}$  NMR (161.976 MHz, DMSO- $d_6$ , 298 K):  $\delta$  18.56, 27.68, 111.27 ppm. Mp: 248.1 °C. MALDI TOF:  $C_{76}H_{80}AgO_4P_4SbF_6$ : m/z 1522.3000 Found m/z: 1329.9229 (M+K-SbF<sub>6</sub>)

#### ❖ Synthesis of 11

**1** (0.295 g, 0.5 mmol) and  $AuCl.SMe_2$  (0.298 g, 1 mmol) were taken in a flask, and 40 mL of DCM was added to the reaction mixture. After overnight stirring at room temperature, the reaction was filtered off. The colourless crystals suitable for X-ray analysis were obtained from a THF and n-pentane mixture at room temperature. Yield: 600 mg (75 %).  $^1H$  NMR (400 MHz, DMSO- $d_6$ , 298K):  $\delta$  1.24 (s, 18H,  $CMe_3$ ), 6.06 (s, 1H, aromatic CH) 7.39 (s, 1H, aromatic CH), 7.55-7.70 (m, 20H, aromatic CH) ppm.  $^{13}C\{^1H\}$  NMR (100.6 MHz, DMSO- $d_6$ , 298K):  $\delta$  30.08 ( $CMe_3$ ), 34.69 ( $CMe_3$ ), 126.54, 130.33, 130.45, 131.75, 131.92, 133.68, 135.72, 151.44 ppm.  $^{31}P\{^1H\}$  NMR (161.976 MHz, DMSO- $d_6$ , 298 K):  $\delta$  110.91 ppm. Mp: 154.2 °C. MALDI TOF:  $C_{38}H_{40}AuO_2P_2Cl$ : m/z 1060.1681 Found m/z: 1021.9920 (M-1-Cl)

#### ❖ Synthesis of 12

**1** (0.295 g, 0.5 mmol) and  $AuCl.SMe_2$  (0.298 g, 1 mmol) were taken in a flask, and 40 mL of DCM was added to the reaction mixture. After overnight stirring at room temperature, 1 equivalent of  $AgSbF_6$  (0.344 g, 1 mmol) was added at 0 °C and stirred at room temperature. The reaction was filtered off. The colourless crystals suitable for X-ray analysis were obtained from a dichloromethane and n-pentane mixture at room temperature. Yield: 600 mg (66 %).  $^1H$  NMR (400 MHz, DMSO- $d_6$ , 298K):  $\delta$  1.17 (s, 36H,  $CMe_3$ ), 6.80 (s, 2H, aromatic CH), 7.30-

7.57 (m, 36H, aromatic CH), 7.67-7.76 (m, 8H, aromatic CH) ppm.  $^{13}\text{C}\{^1\text{H}\}$  NMR (100.6 MHz, DMSO- $d_6$ , 298K):  $\delta$  30.07 ( $\text{CMe}_3$ ), 34.89 ( $\text{CMe}_3$ ), 128.28, 130.27, 130.61, 130.82, 130.88, 130.95, 131.68, 131.77, 131.86, 135.11, 136.44, 151.25, 165.04 ppm.  $^{31}\text{P}\{^1\text{H}\}$  NMR (161.976 MHz, DMSO- $d_6$ , 298 K):  $\delta$  127.20 ppm. Mp: 251.9 °C ESI-MS:  $\text{C}_{76}\text{H}_{80}\text{Au}_2\text{Sb}_2\text{F}_{12}\text{O}_4\text{P}_4$ : m/z 1811.08 Found m/z: 1813.6002.

## S2. NMR Spectroscopic Data for complexes 2-12

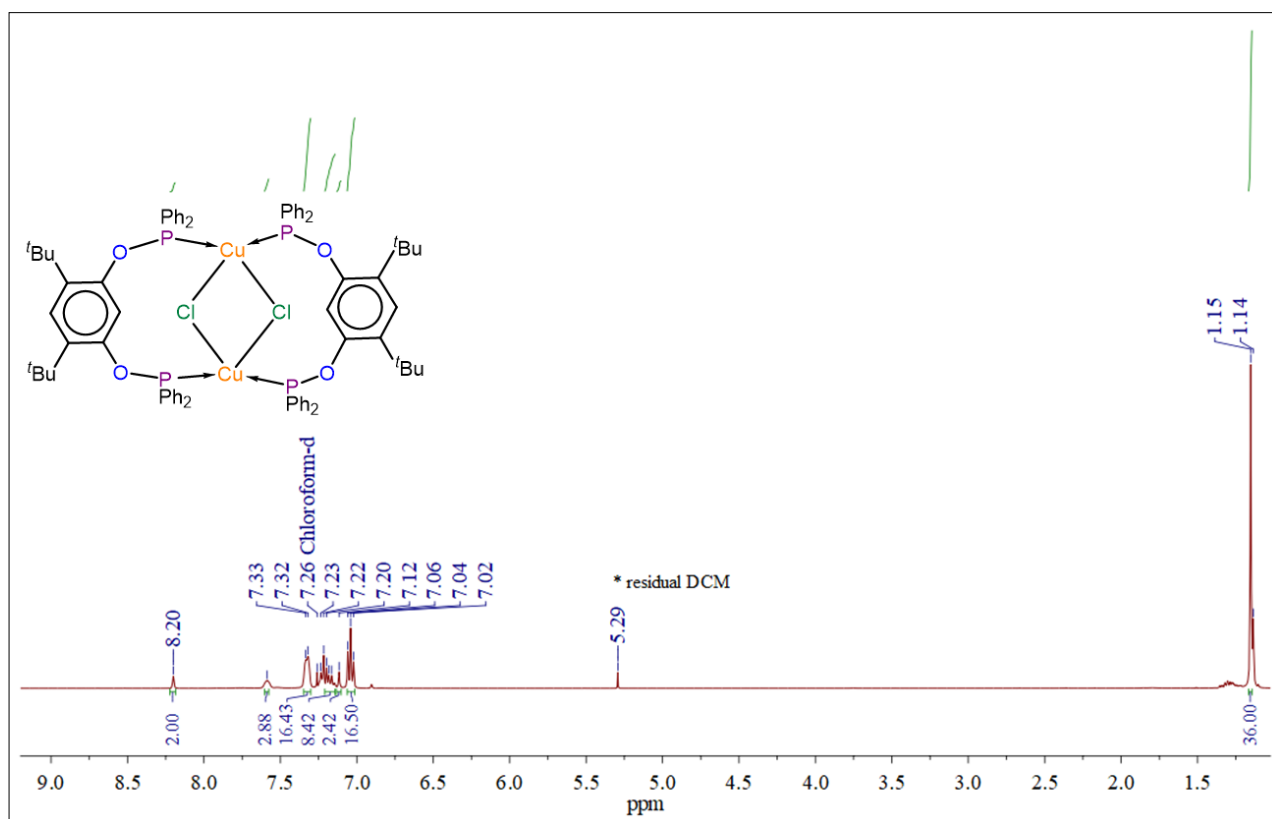

Figure S1.  $^1\text{H}$  NMR spectrum of 2

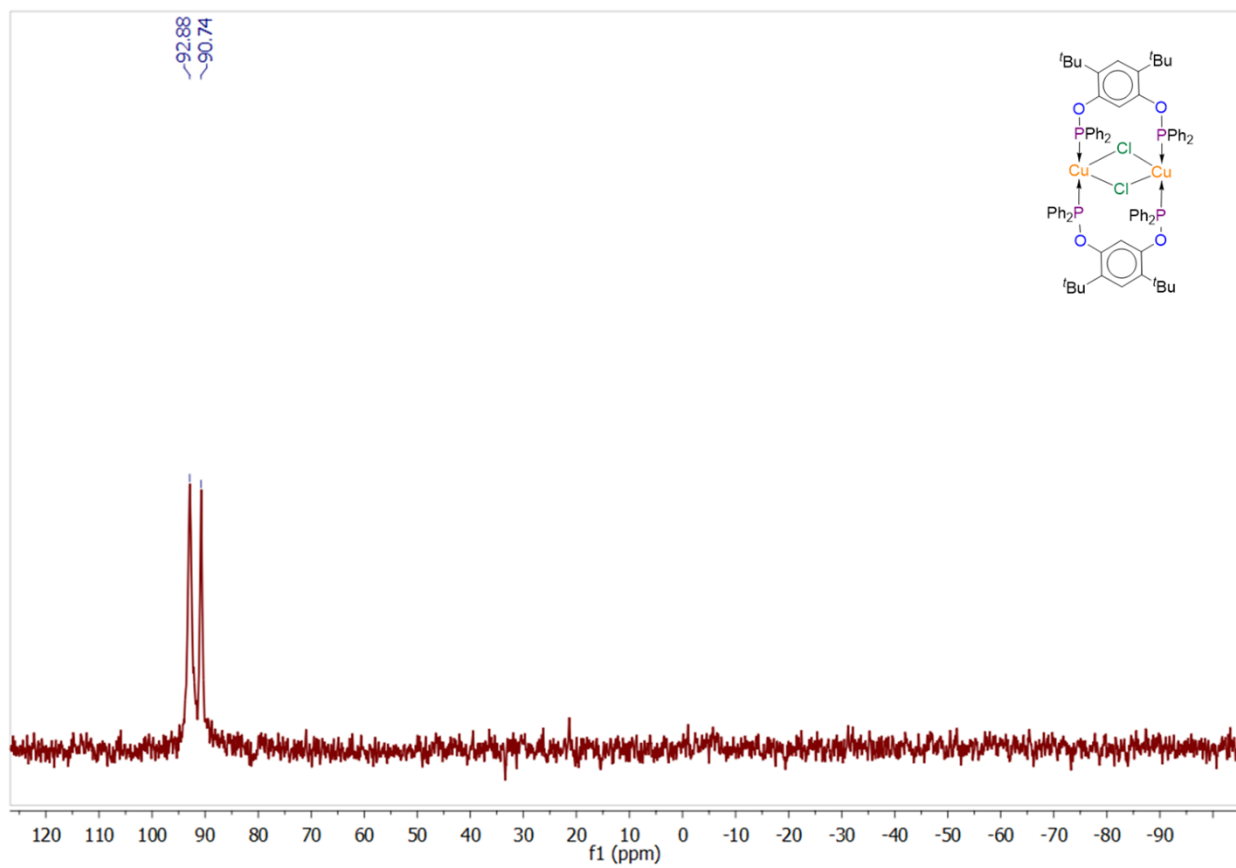

**Figure S2.**  $^{31}\text{P}$  NMR spectrum of **2**



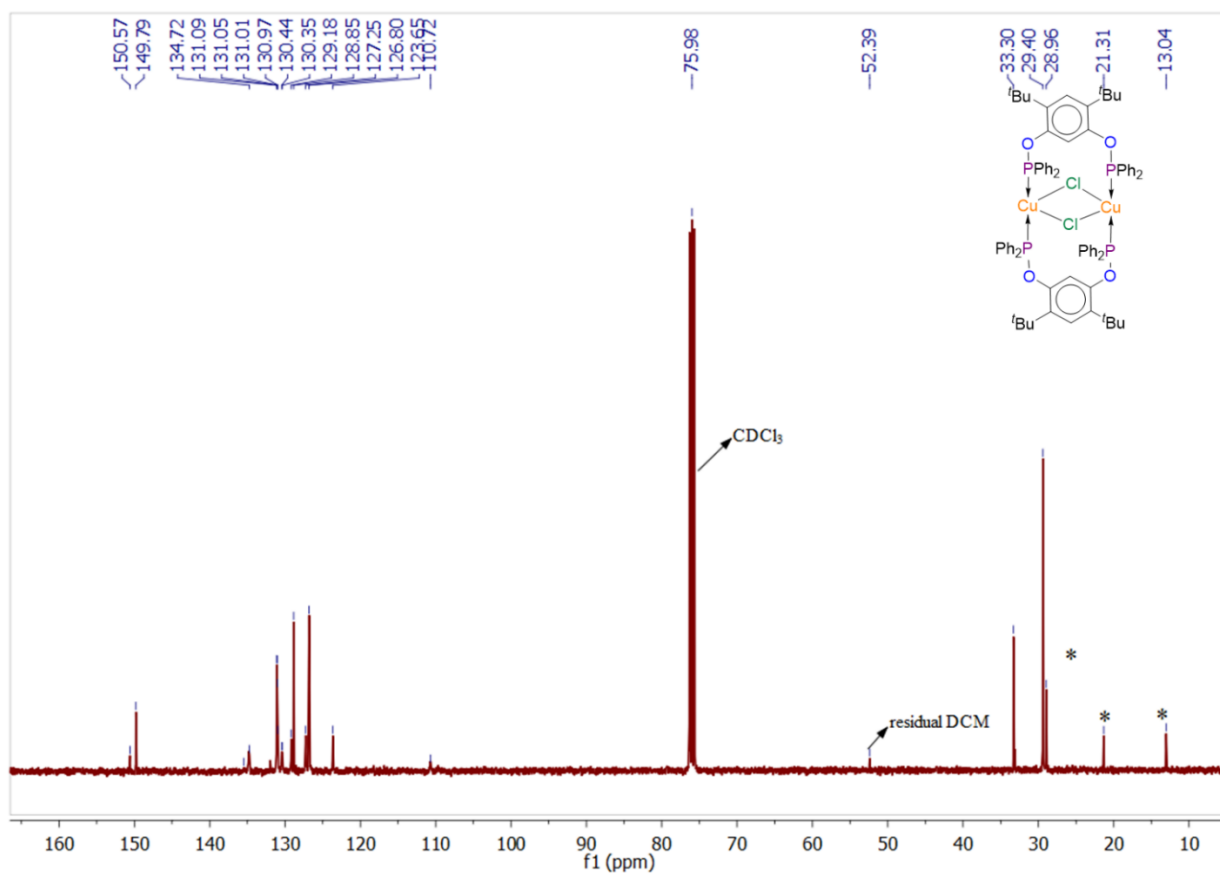

Figure S3.  $^{13}\text{C}$  NMR spectrum of 2

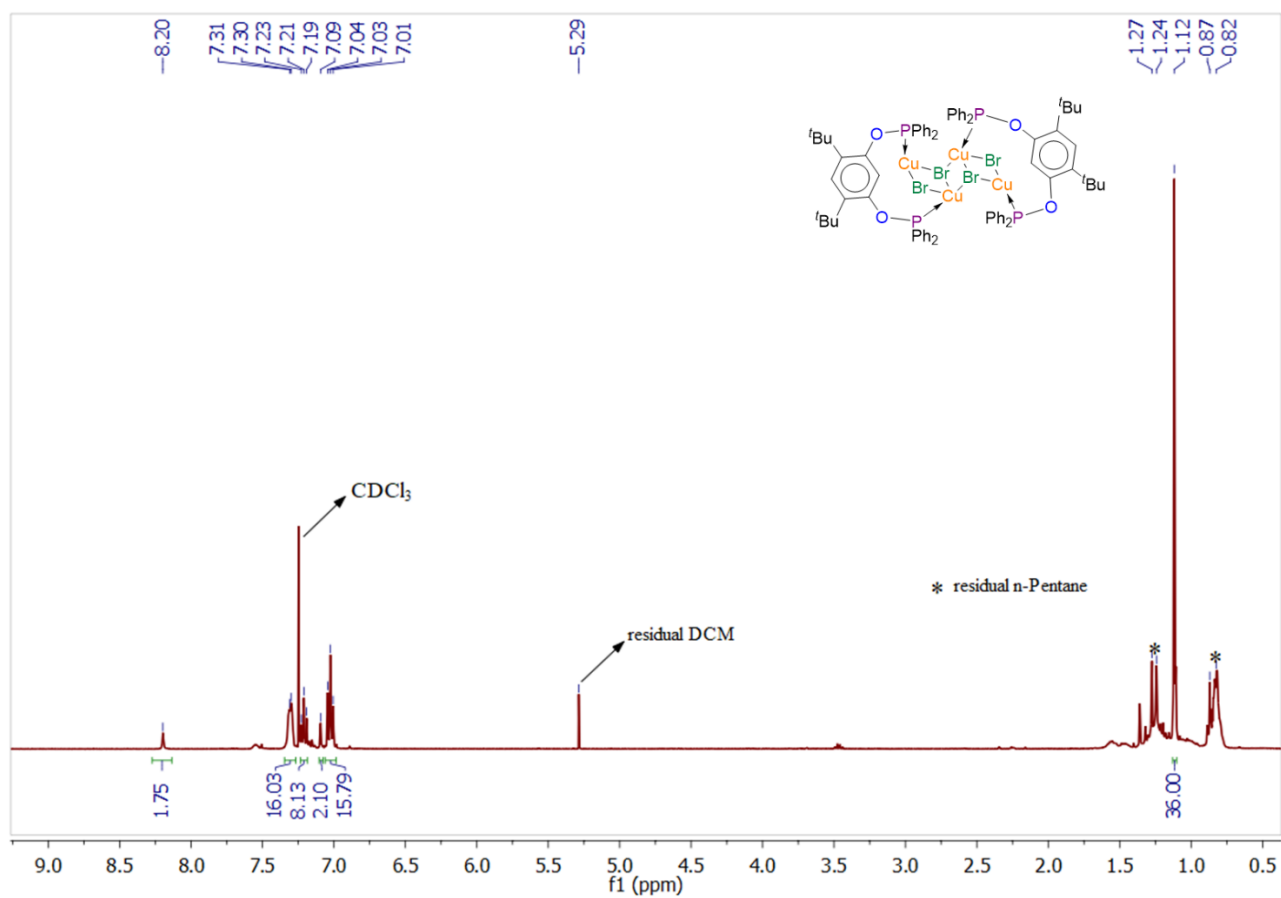

**Figure S4.** <sup>1</sup>H NMR spectrum of **3**

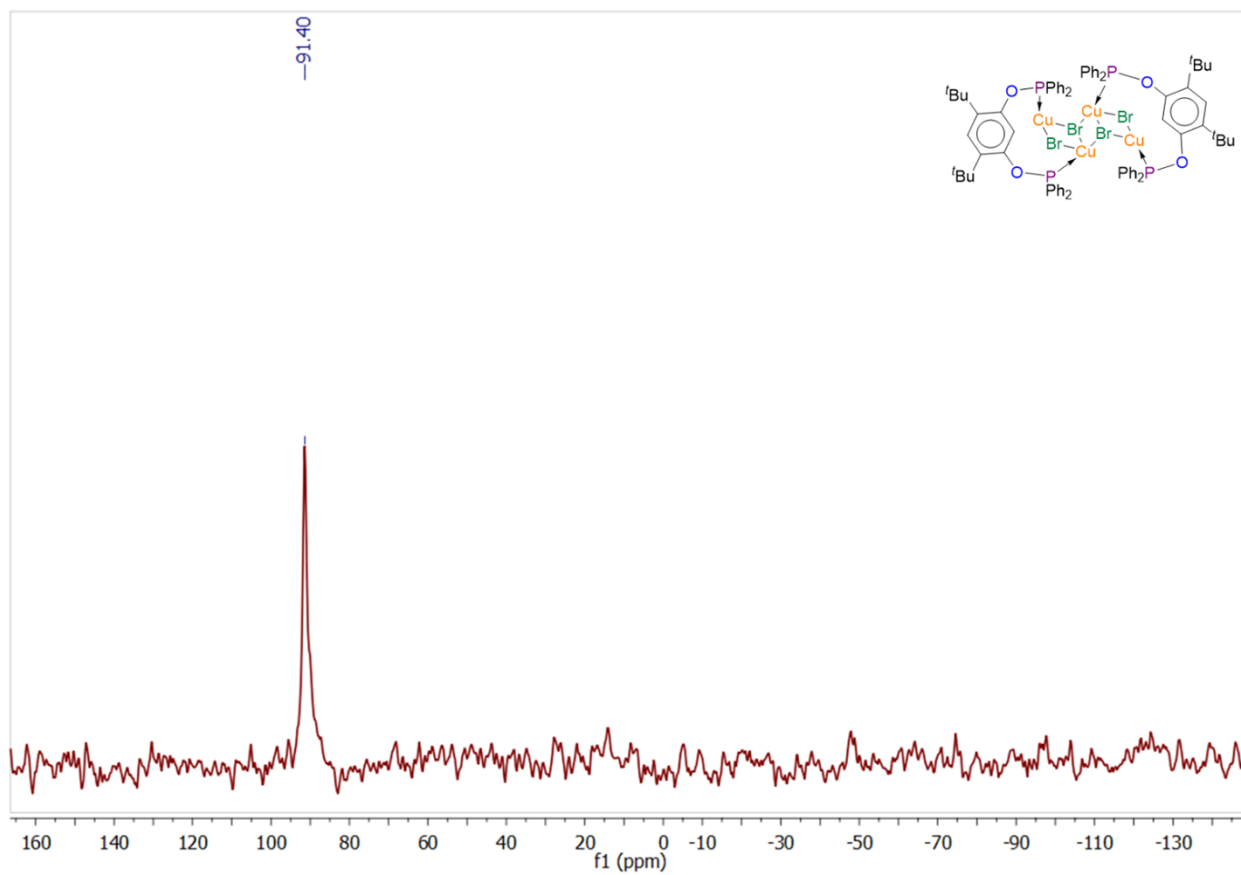

**Figure S5.**  $^{31}\text{P}$  NMR spectrum of **3**

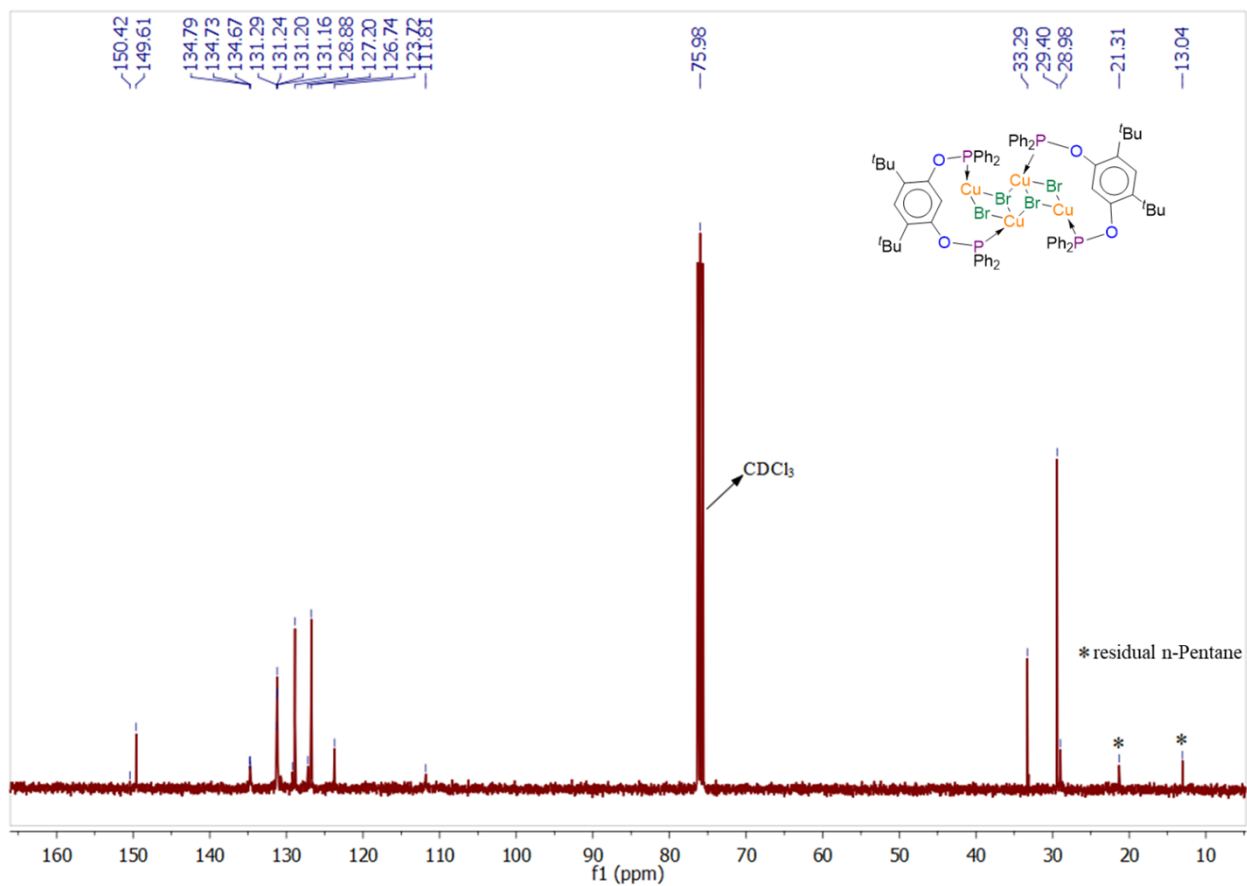

**Figure S6.** <sup>13</sup>C NMR spectrum of **3**

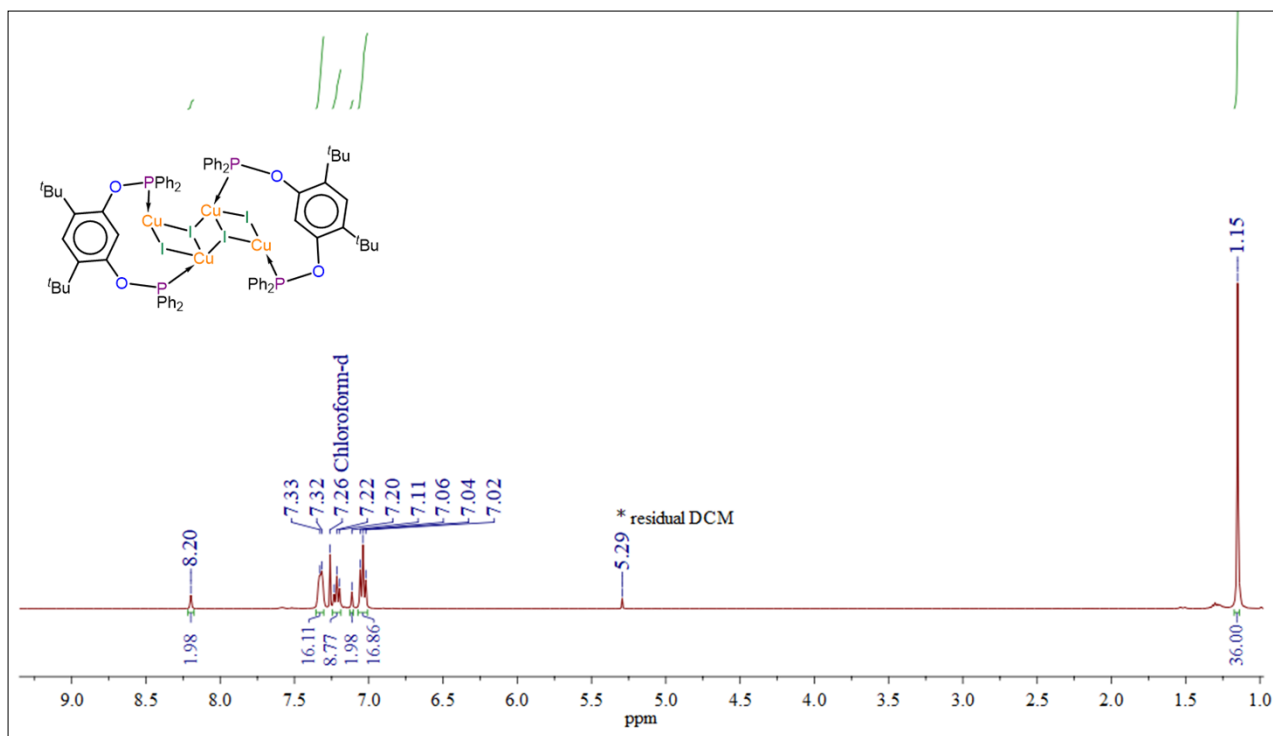

**Figure S7.** <sup>1</sup>H NMR spectrum of **4**

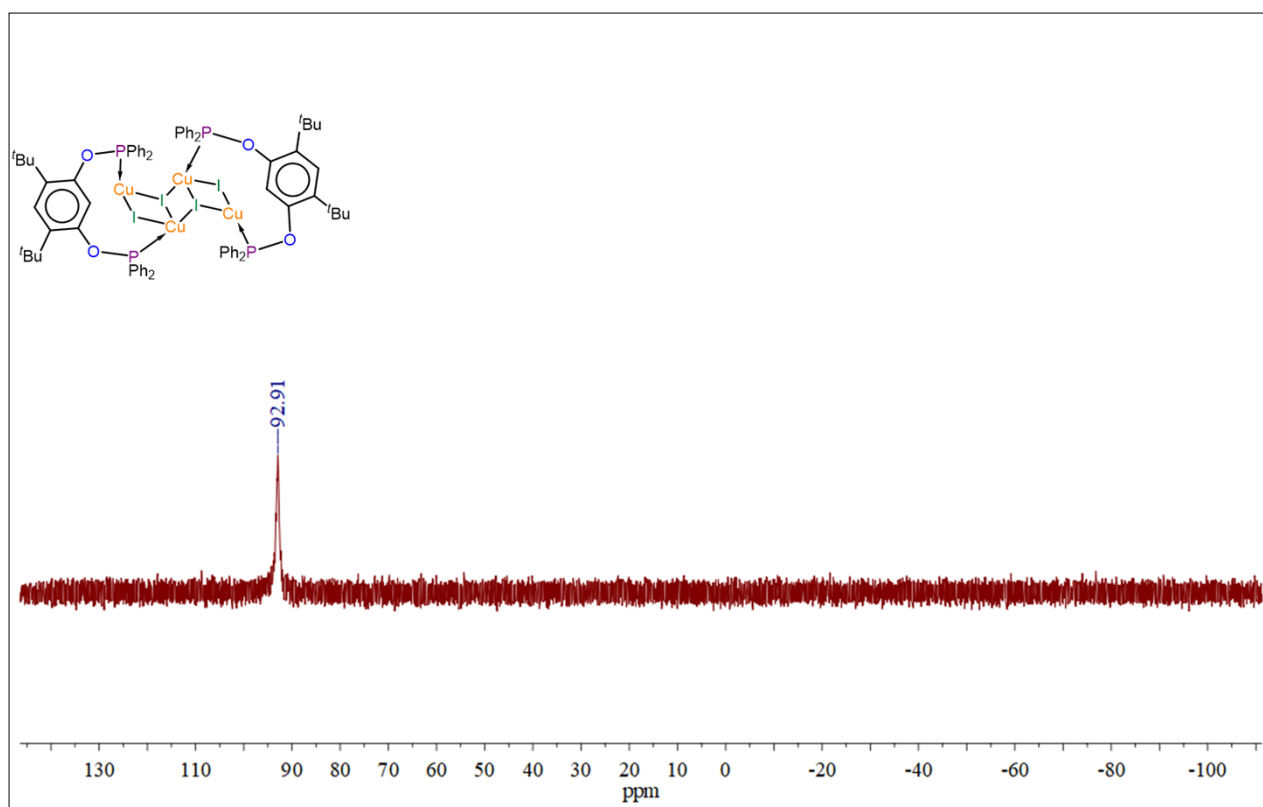

**Figure S8.**  $^{31}\text{P}$  NMR spectrum of **4**

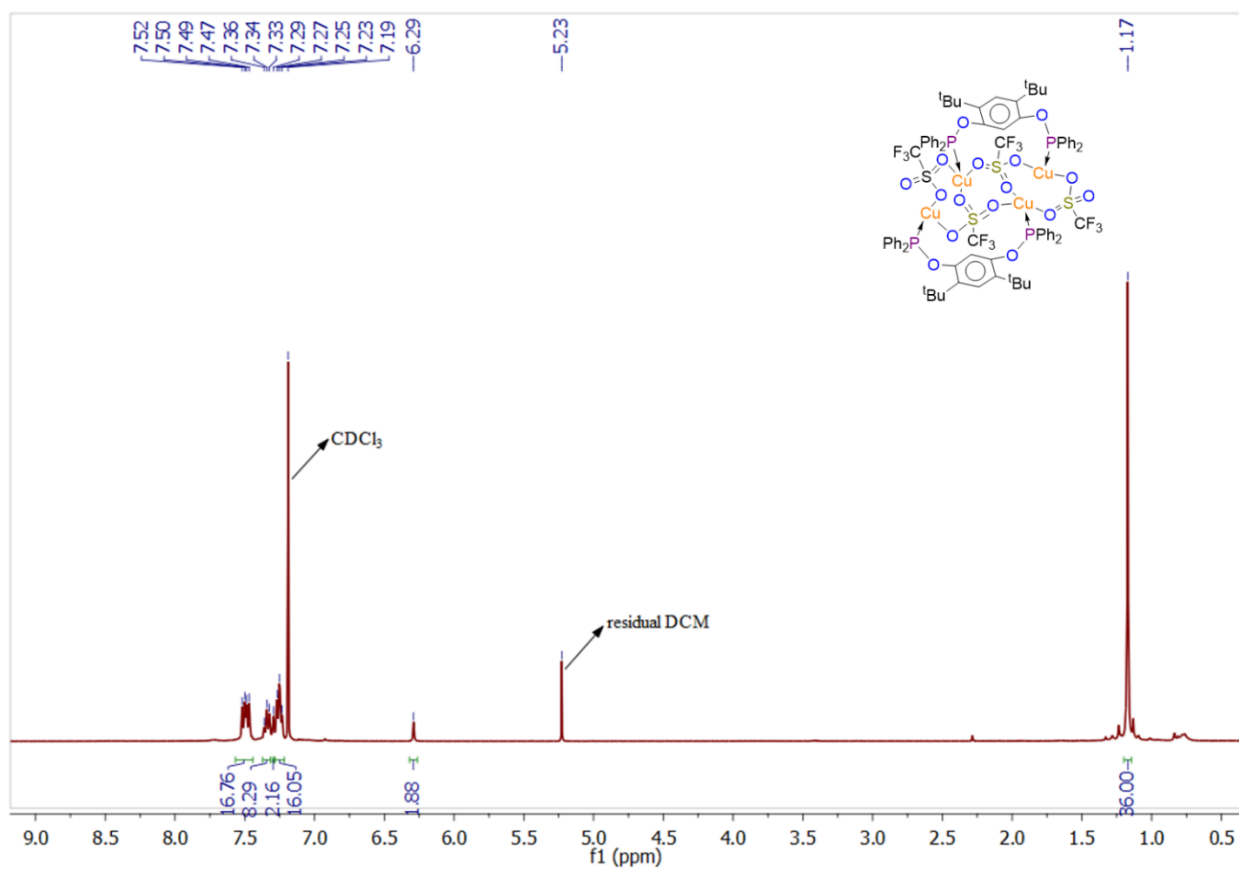

Figure S9.  $^1\text{H}$  NMR spectrum of **5**

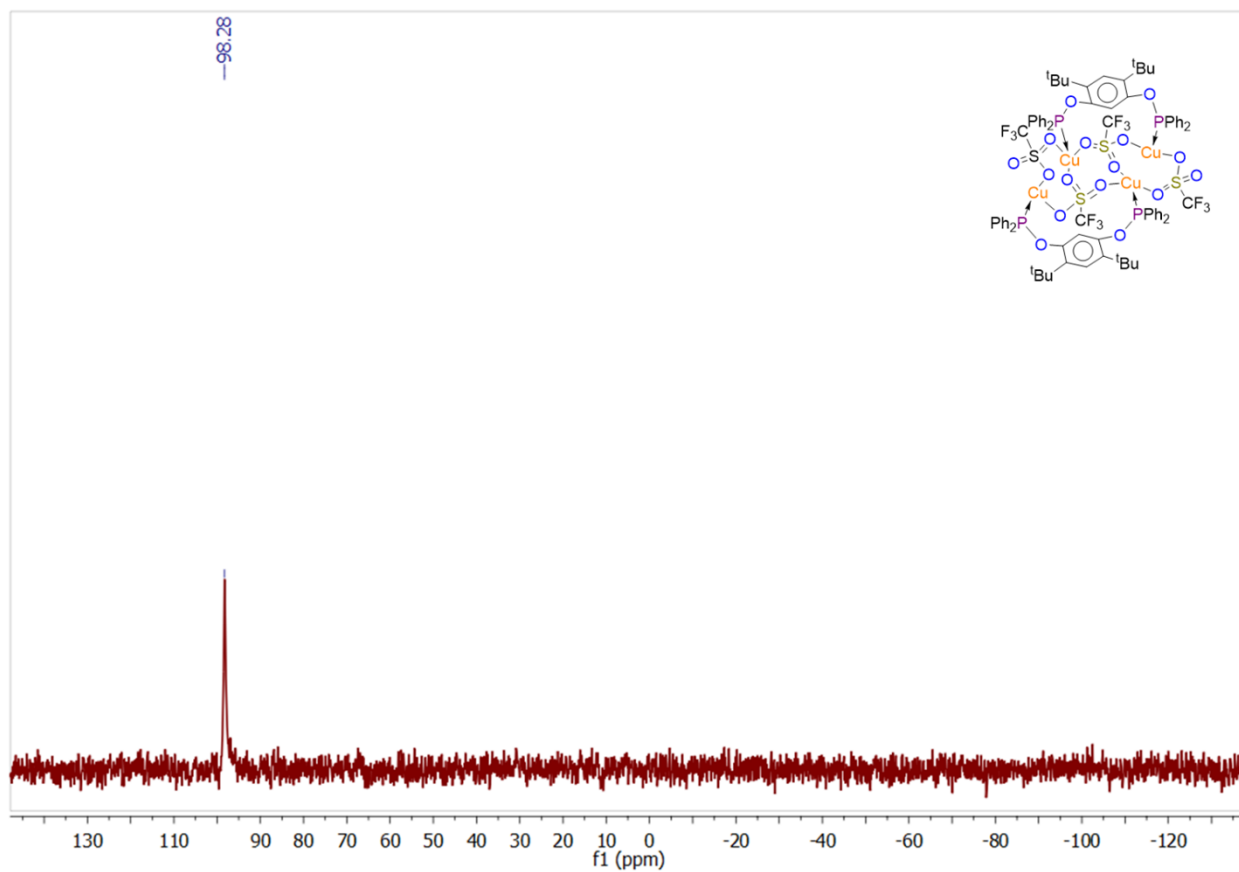

**Figure S10.**  $^{31}\text{P}$  NMR spectrum of **5**



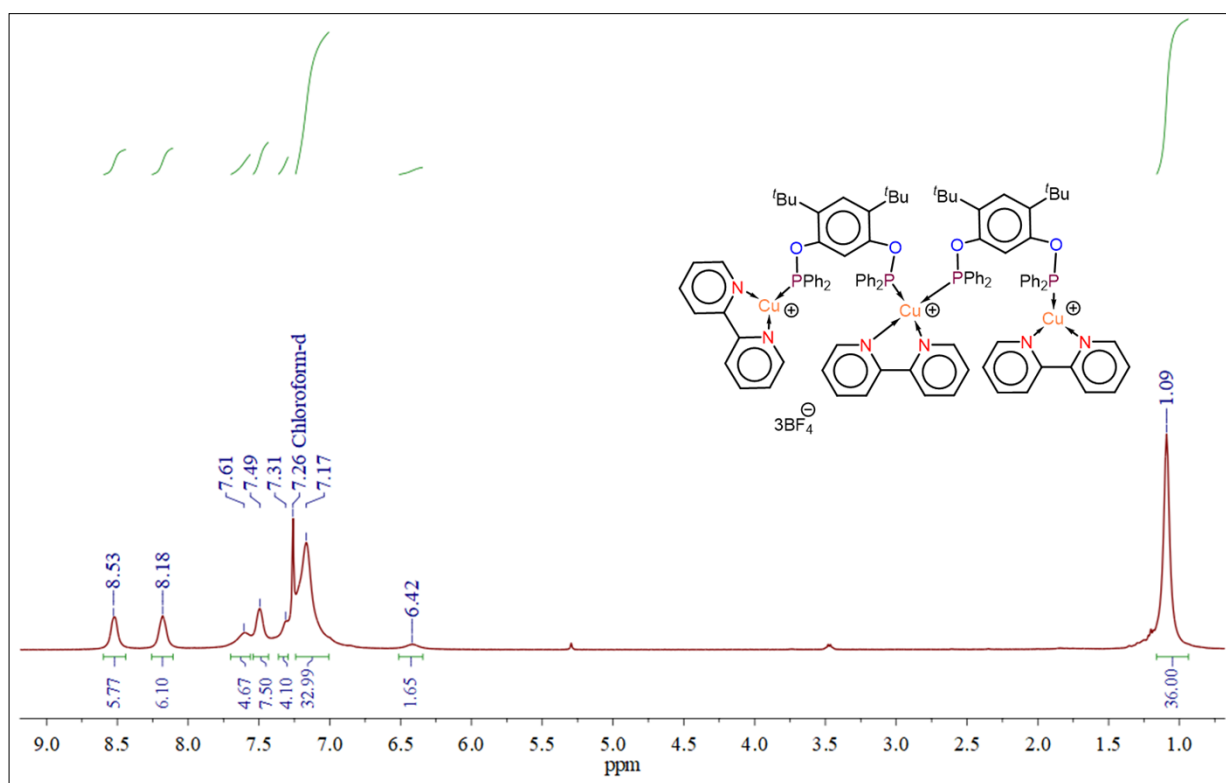

**Figure S11.**  $^1\text{H}$  NMR spectrum of **7**

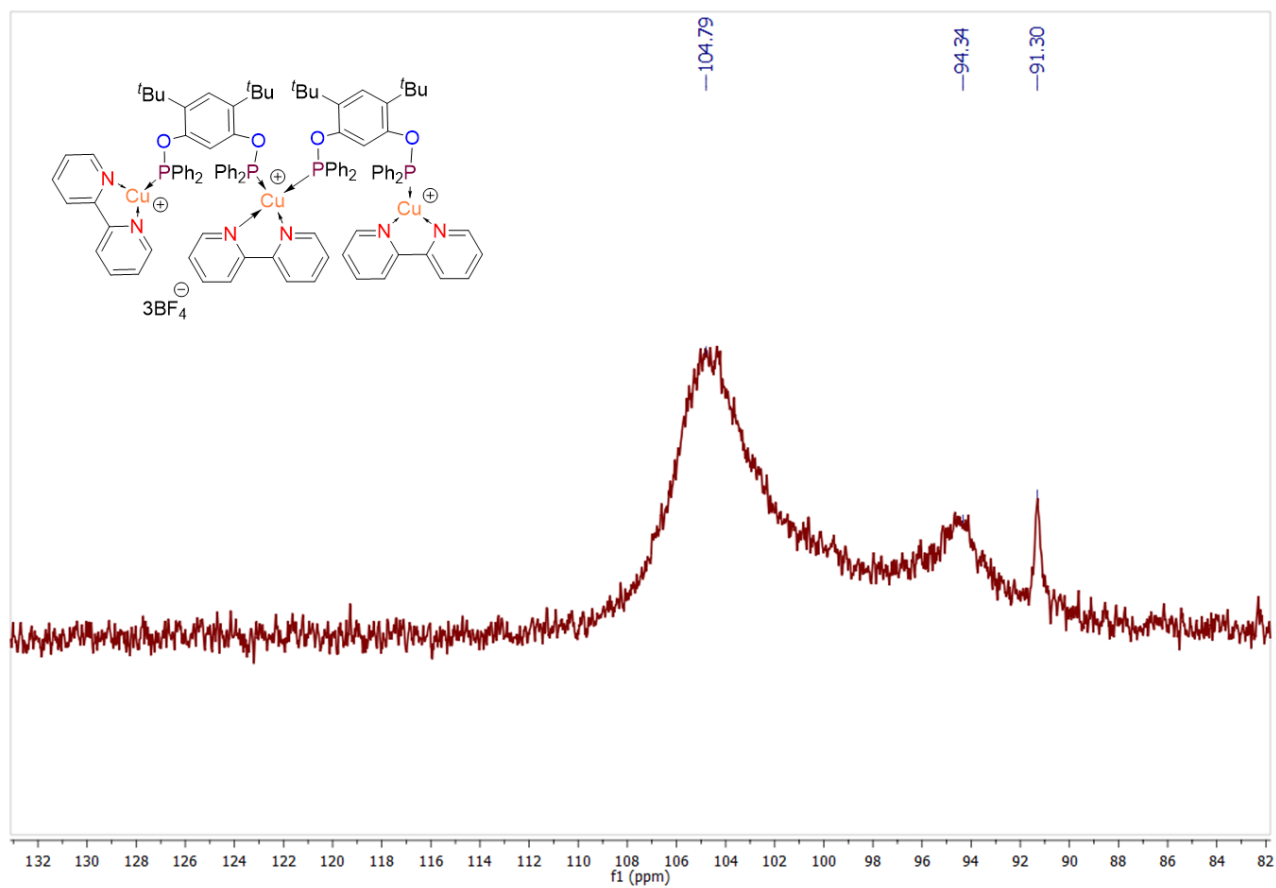

**Figure S12.**  $^{31}\text{P}$  NMR spectrum of 7



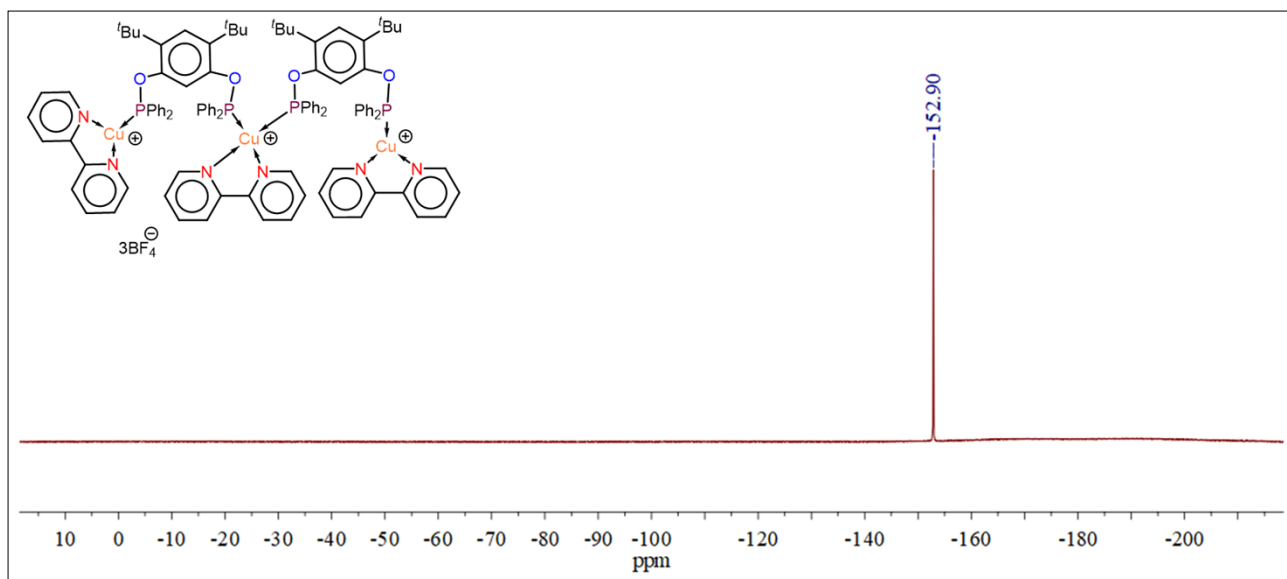

**Figure S14.**  $^{19}\text{F}$  NMR spectrum of **7**

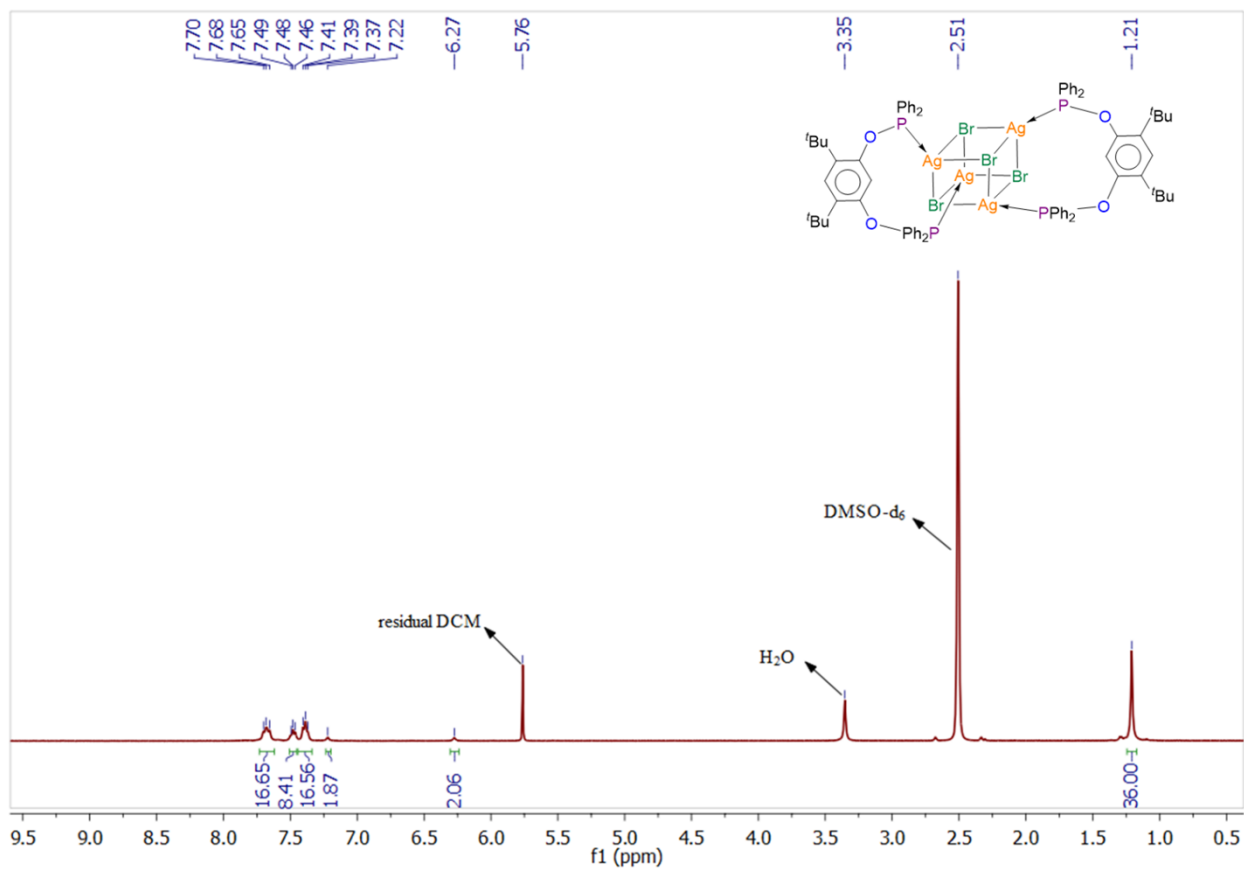

Figure S15. <sup>1</sup>H NMR spectrum of **8**

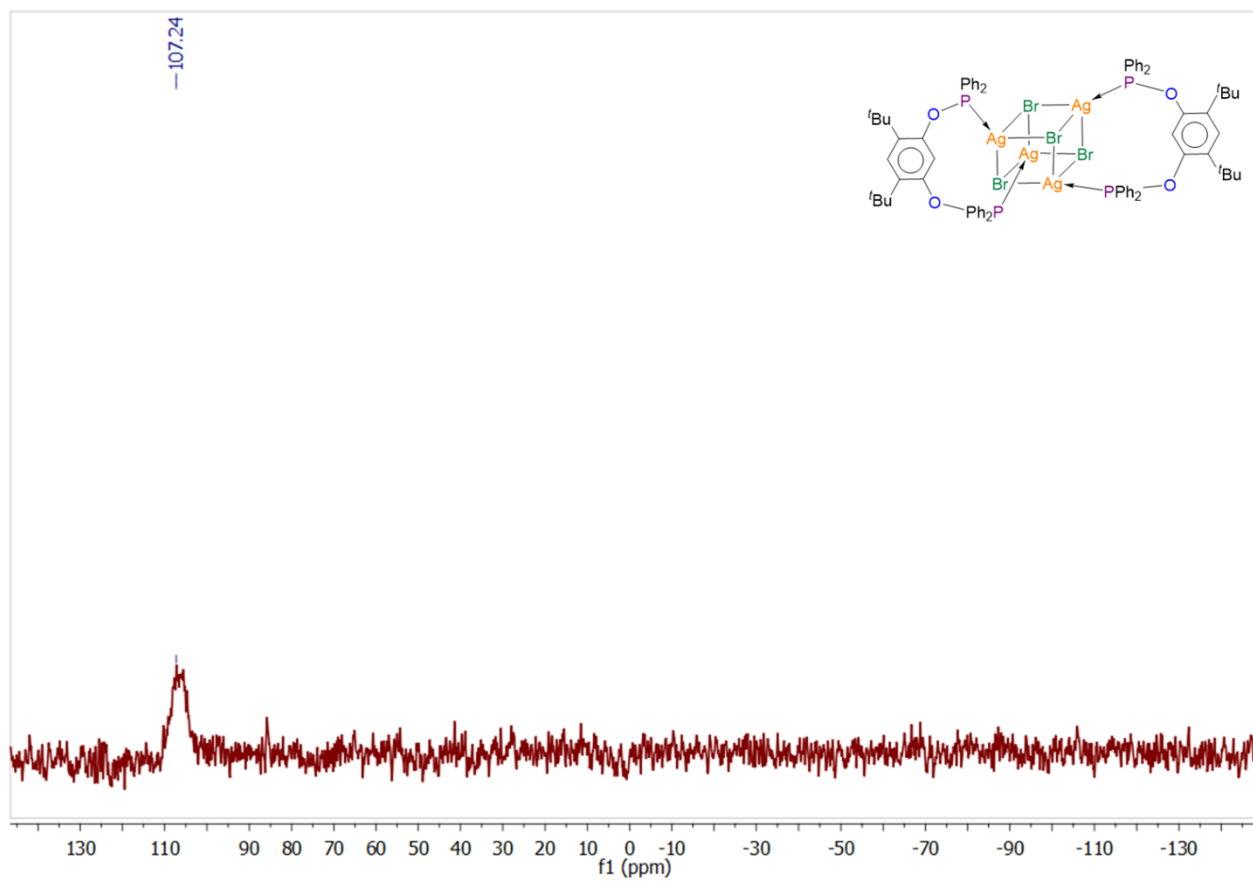

**Figure S16.**  $^{31}\text{P}$  NMR spectrum of **8**

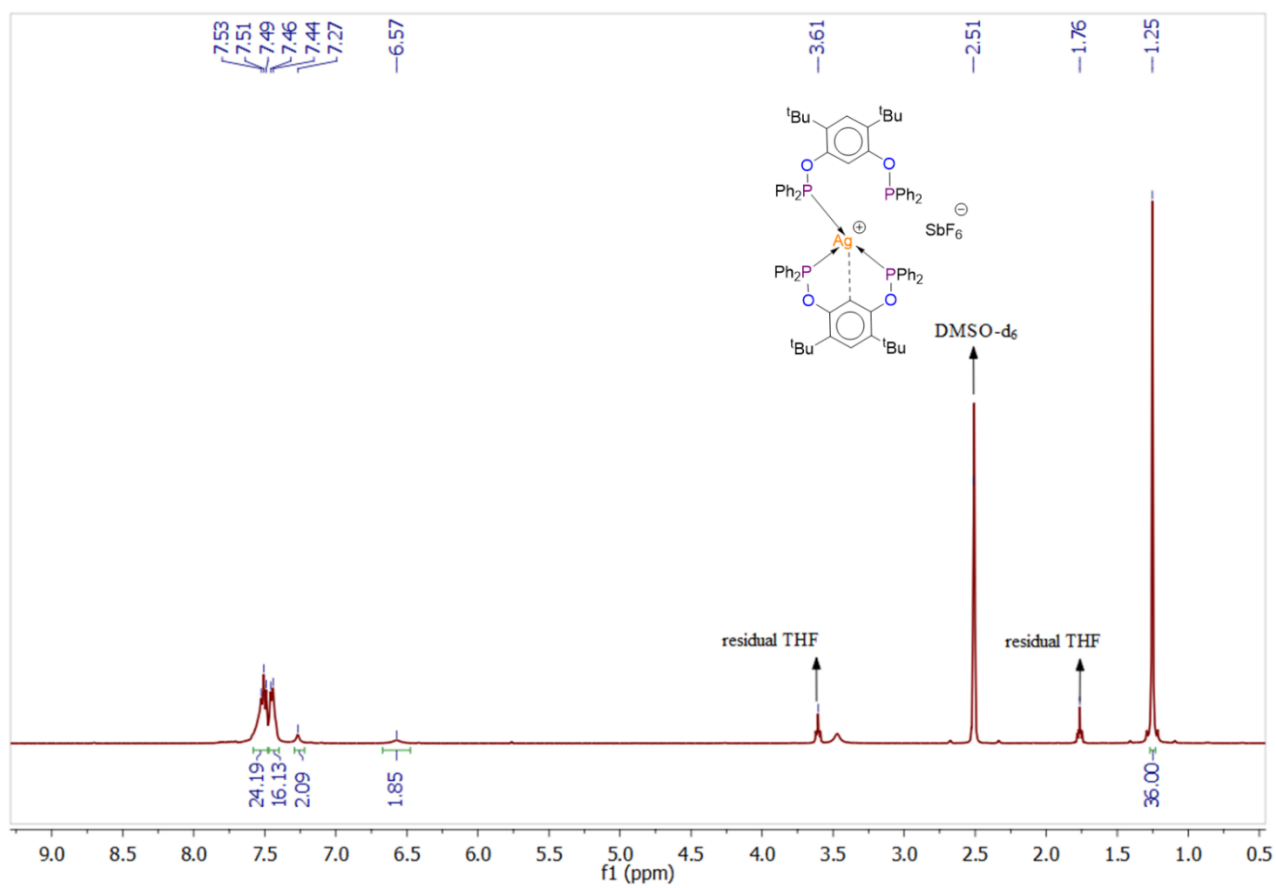

Figure S17.  $^1\text{H}$  NMR spectrum of **10**

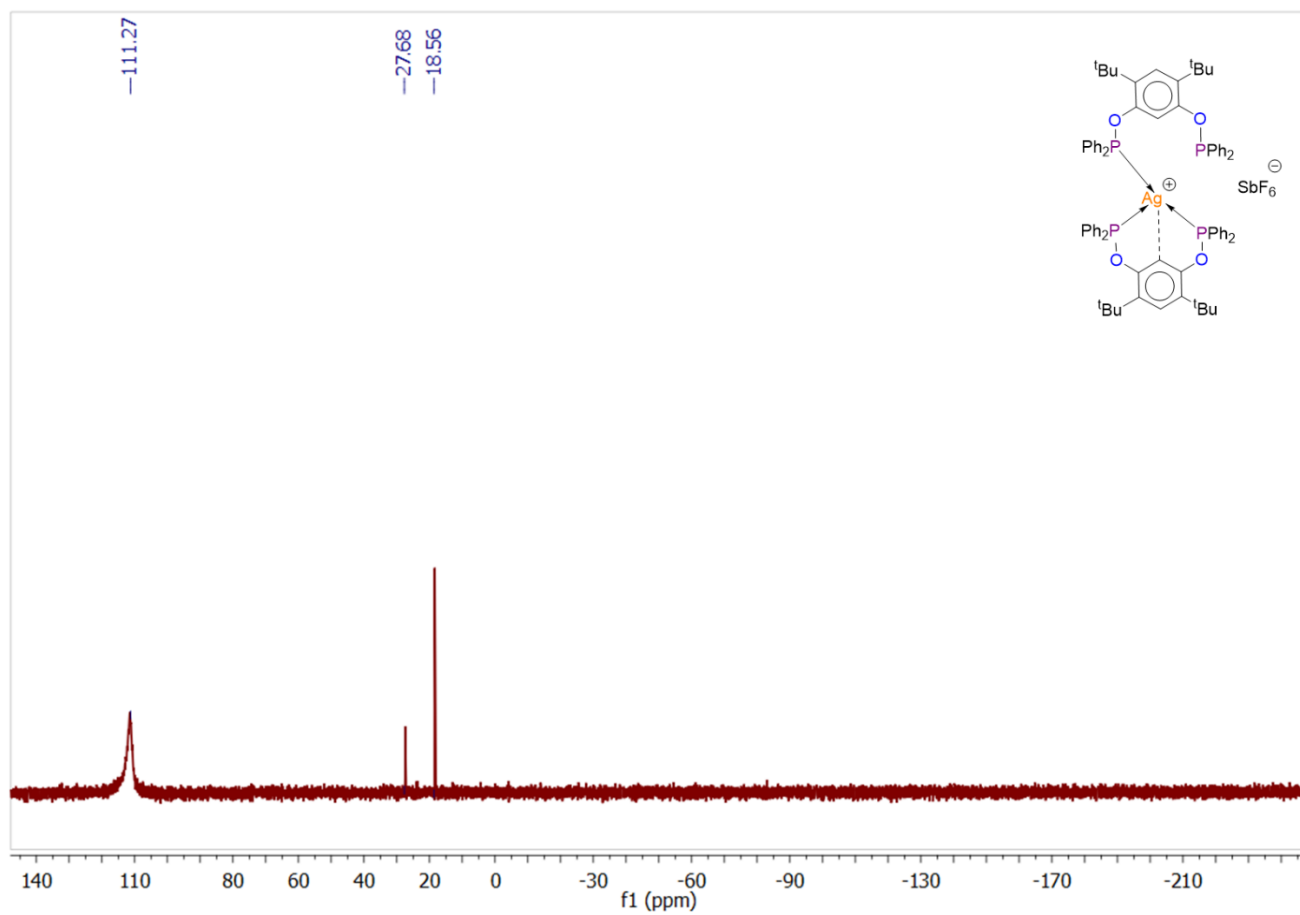

**Figure S18.**  $^{31}\text{P}$  NMR spectrum of **10**



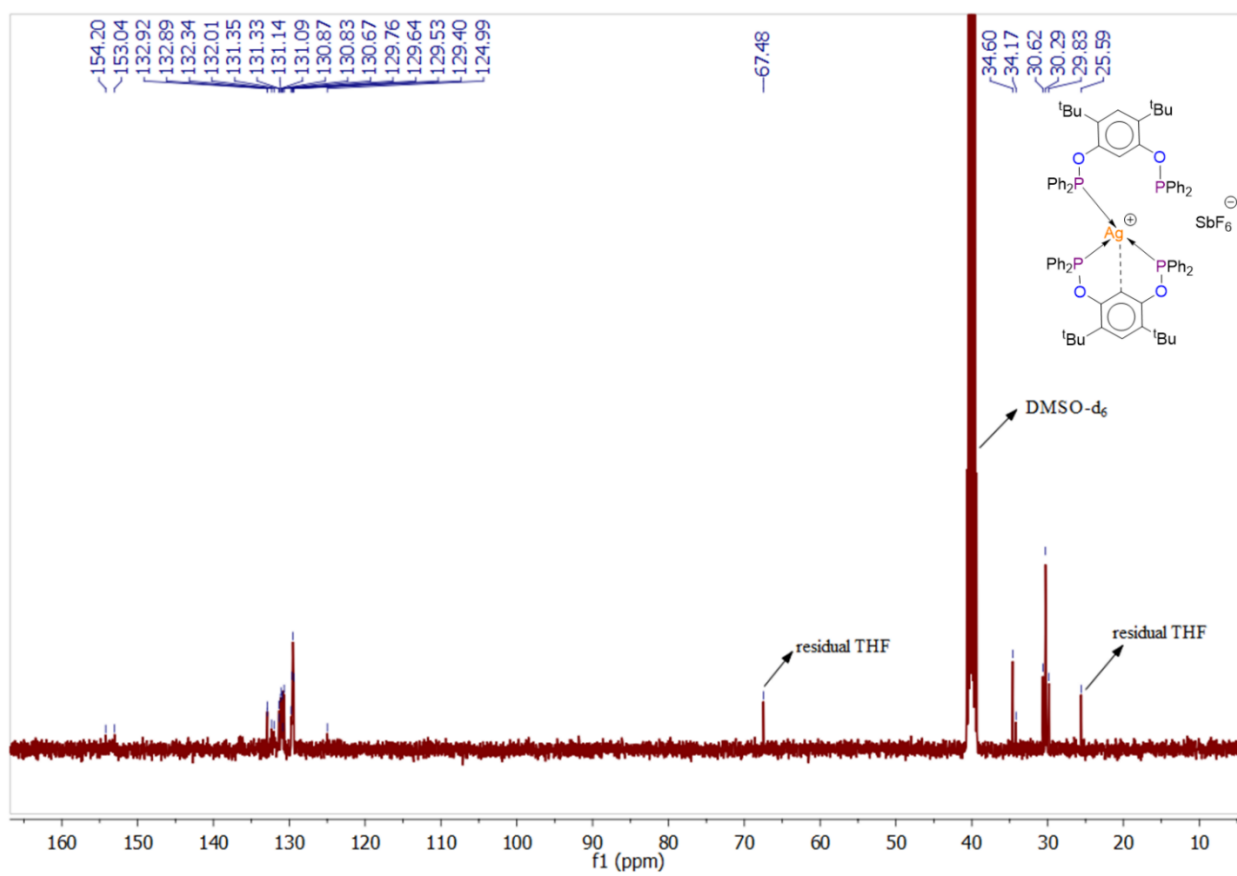

Figure S19. <sup>13</sup>C NMR spectrum of **10**

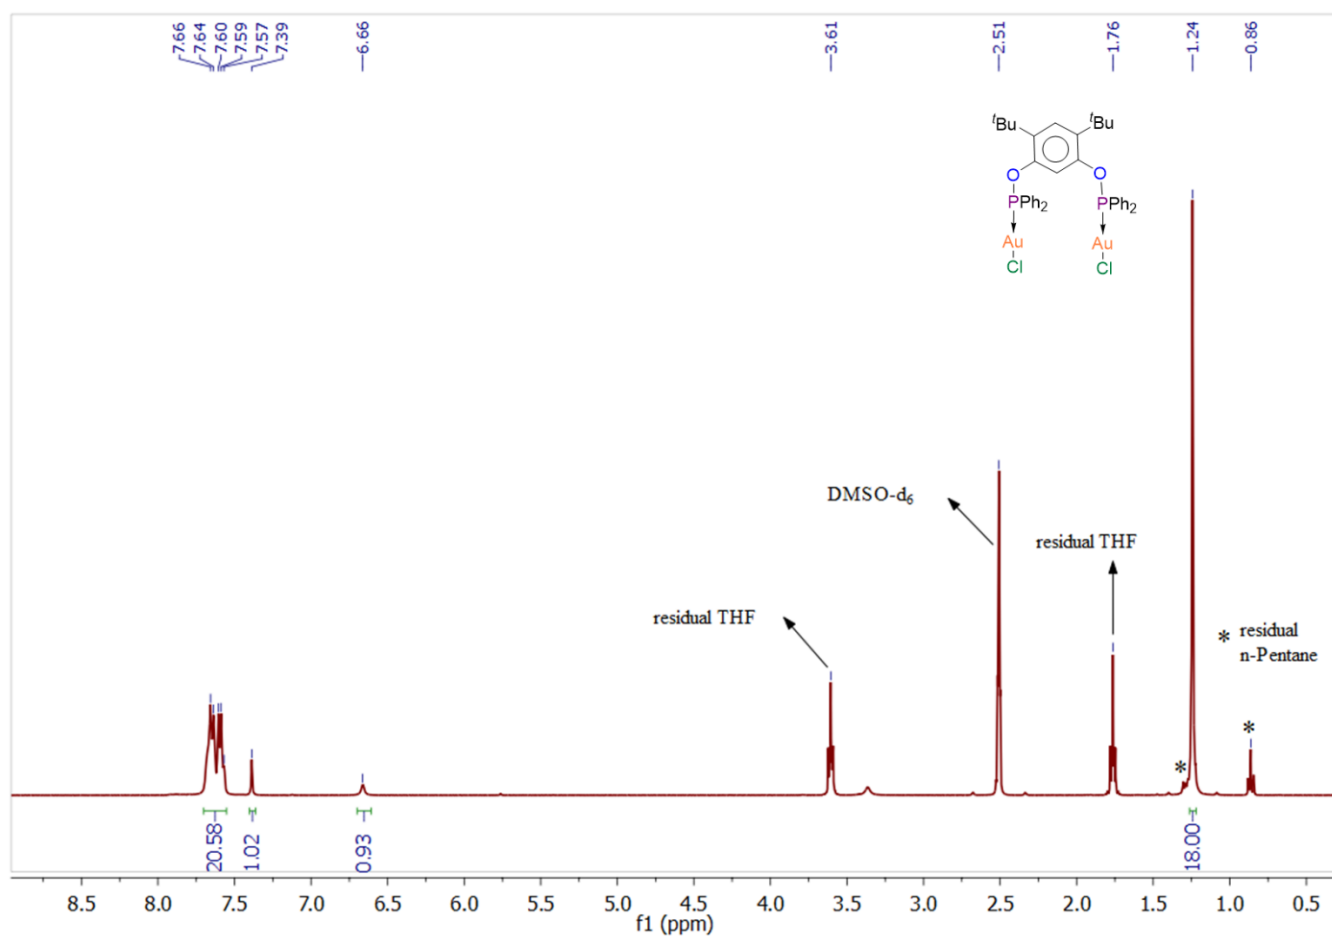

**Figure S20.**  $^1\text{H}$  NMR spectrum of 11

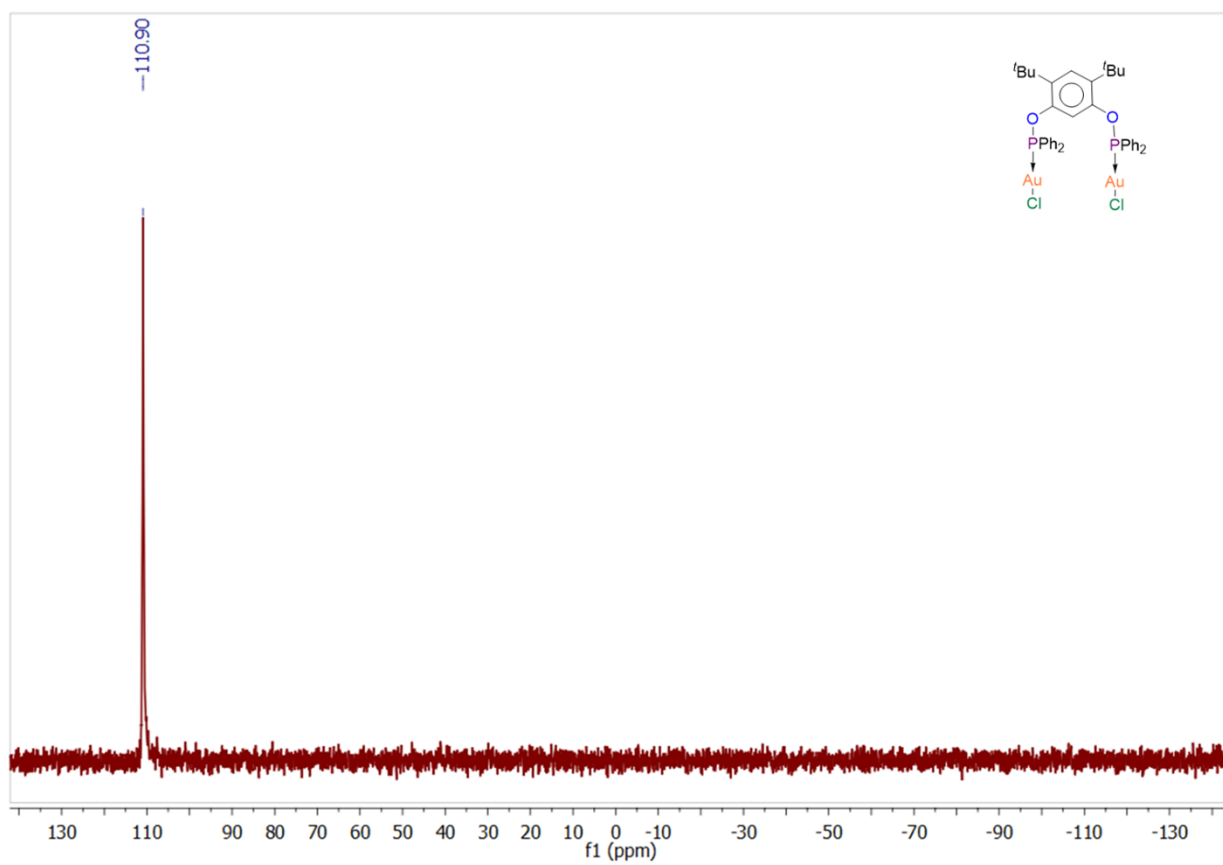

**Figure S21.**  $^{31}\text{P}$  NMR spectrum of **11**

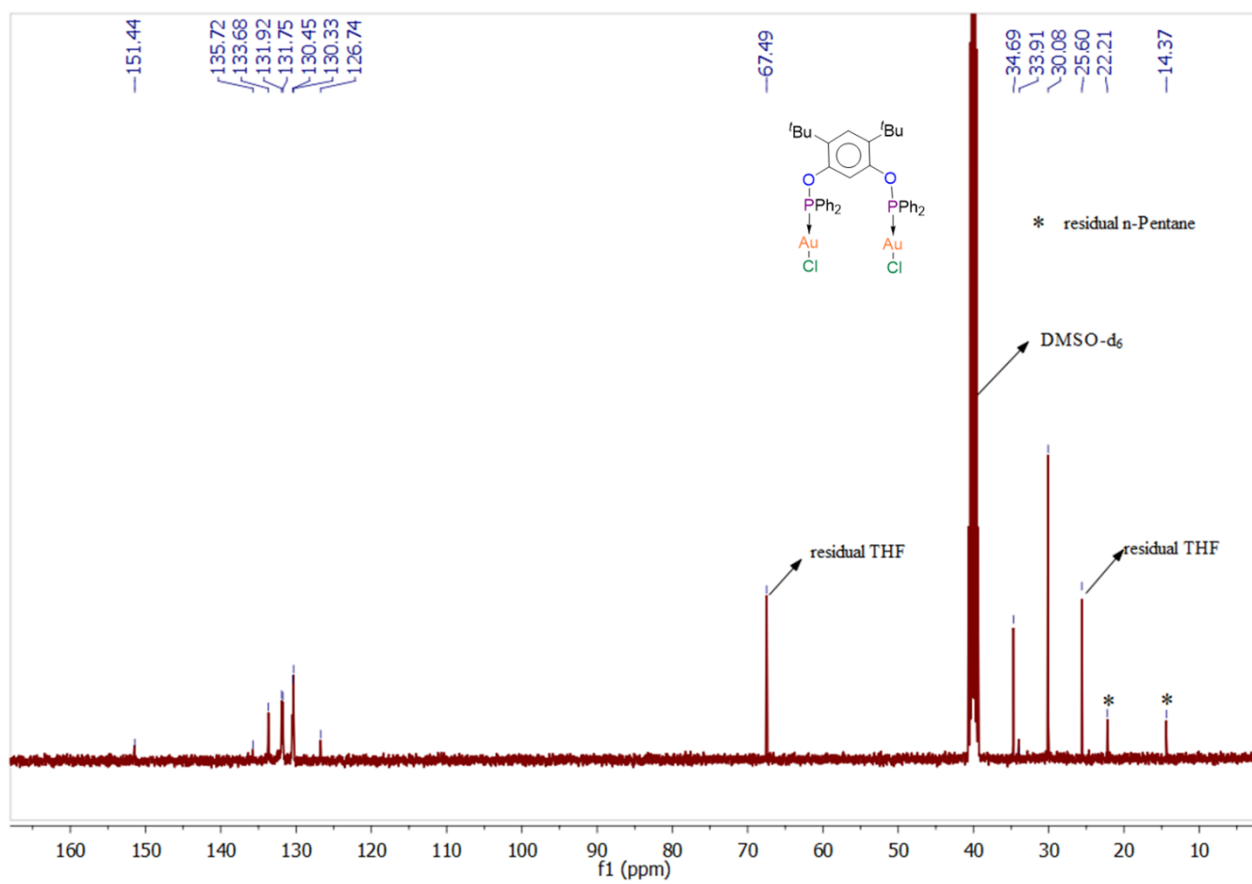

**Figure S22.** <sup>13</sup>C NMR spectrum of **11**

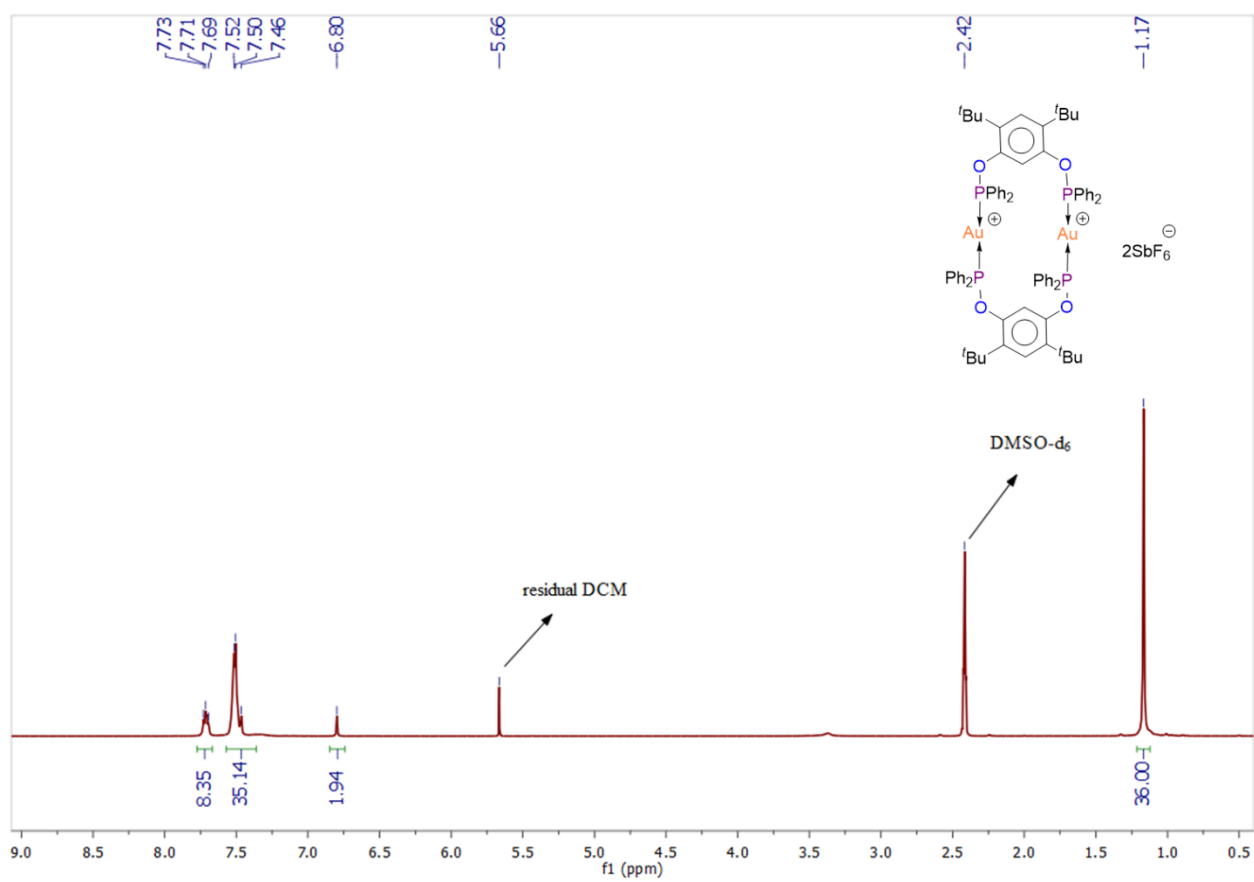

**Figure S23.** <sup>1</sup>H NMR spectrum of **12**

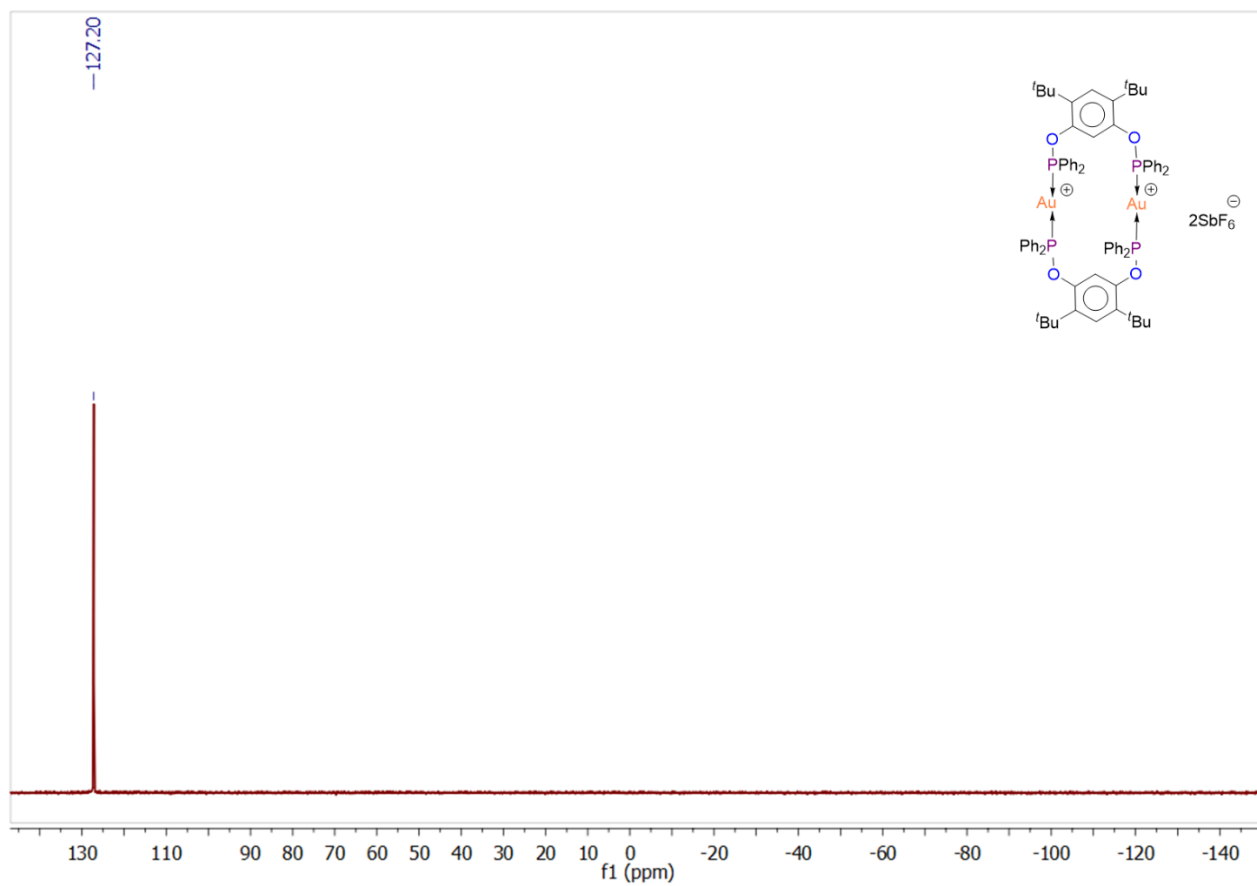

**Figure S24.**  $^{31}\text{P}$  NMR spectrum of **12**

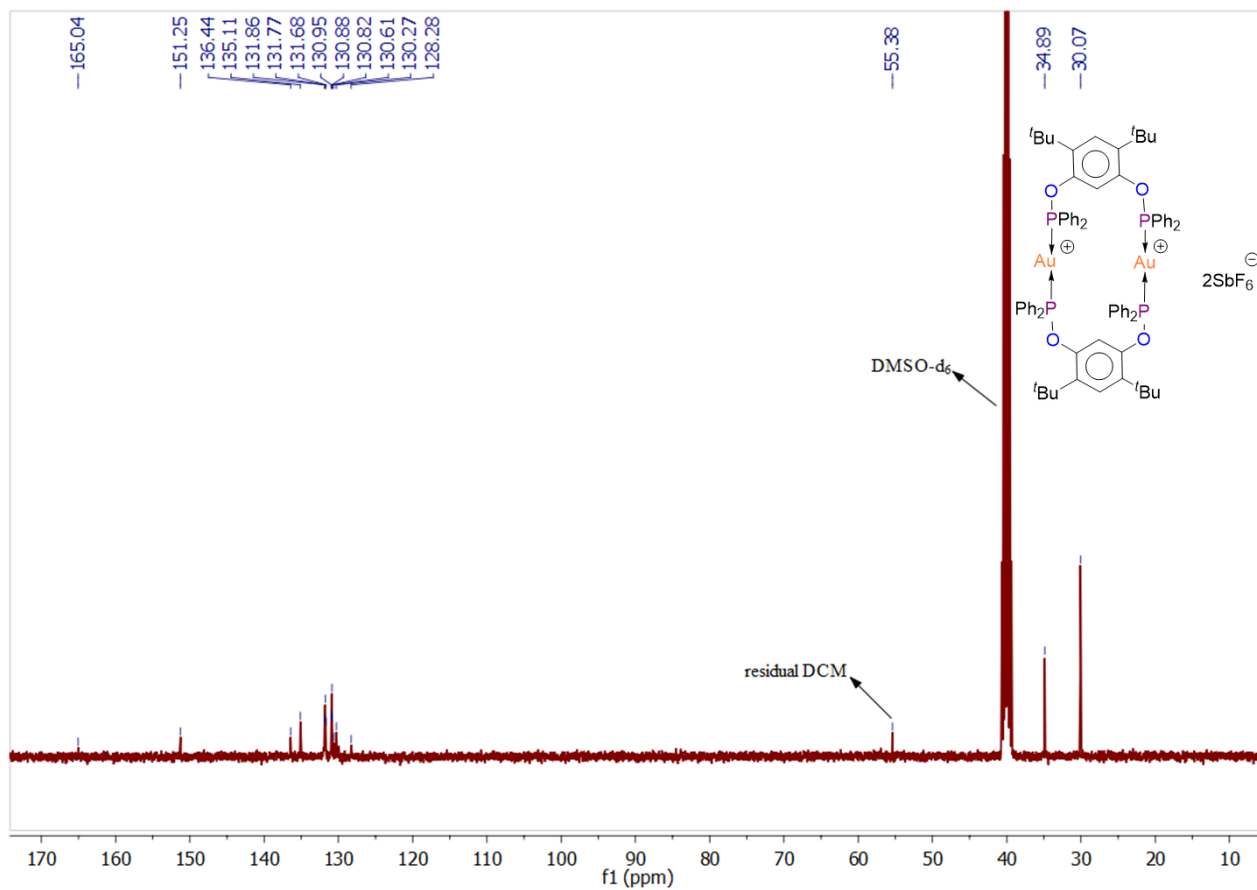

**Figure S25.** <sup>13</sup>C NMR spectrum of **12**

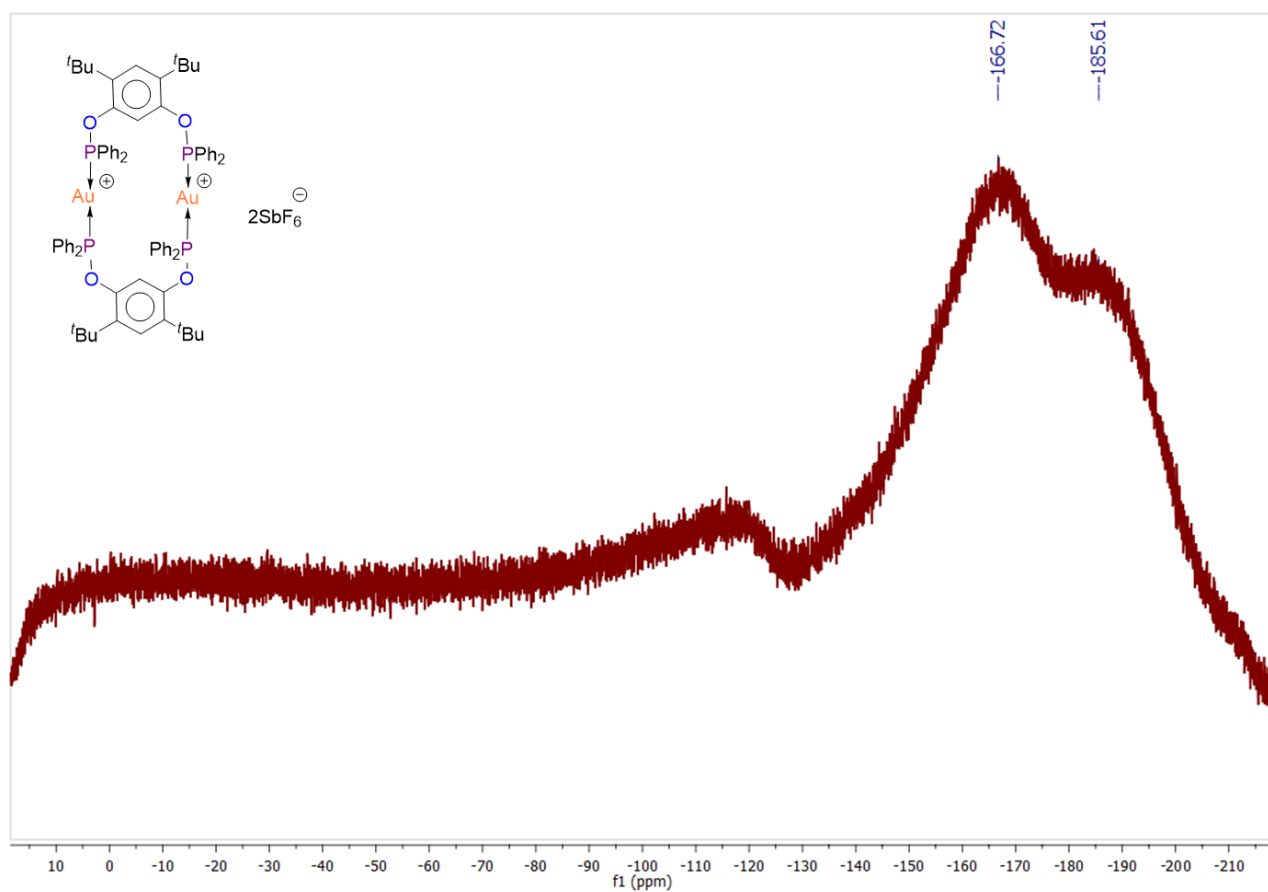

**Figure S26.**  $^{19}\text{F}$  NMR spectrum of **12**



### **S3. Crystallographic Details of 2-12.**

Crystal data for **2-12** were collected on a Bruker Smart Apex Duo diffractometer at 100 K using MoK $\alpha$  radiation ( $\lambda = 0.71073 \text{ \AA}$ ). The absorption correction was done using the multi-scan method (SADABS). The structures were solved by direct methods and refined by full-matrix least-squares methods against F<sup>2</sup> (SHELXL-2014/6) and Olex<sup>2</sup> with the ShelXT<sup>3</sup> structure solution program. Attempts to refine residual electron density peaks as disordered or partial occupancy solvent toluene carbon atoms were unsuccessful. The data were corrected for disordered electron density using the SQUEEZE procedure implemented in PLATON.<sup>4</sup> We used solvent masking for complexes **2**, **3** and **4**, the solvent mask corresponds to CH<sub>2</sub>Cl<sub>2</sub>. Moreover, we also used solvent mask for **6**, the solvent mask corresponds to CH<sub>2</sub>Cl<sub>2</sub> and toluene. Crystallographic data files for the **2-12** have been deposited with the Cambridge Crystallographic Data Centre. CCDC No.: 2244747 (**2**), 2244748 (**3**), 2244749 (**4**), 2244750 (**5**), 2244751 (**6**), 2244752 (**7**), 2244753 (**8**), 2244755 (**9**), 2244756 (**10**), 2244757 (**11**), 2244758 (**12**)

### **S3. Crystal Data and Structure Refinement Data for 2-12**

|                                        | <b>2</b>                                                                                                    | <b>3</b>                                                                                                     | <b>4</b>                                                                                                                    | <b>5</b>                                                                                                                         |
|----------------------------------------|-------------------------------------------------------------------------------------------------------------|--------------------------------------------------------------------------------------------------------------|-----------------------------------------------------------------------------------------------------------------------------|----------------------------------------------------------------------------------------------------------------------------------|
| <b>Sum formula</b>                     | C <sub>76</sub> H <sub>80</sub> Cl <sub>2</sub> Cu <sub>2</sub><br>O <sub>4</sub> P <sub>4</sub> [+solvent] | C <sub>76</sub> H <sub>80</sub> Br <sub>4</sub> Cu <sub>4</sub> O <sub>4</sub><br>P <sub>4</sub> [+ solvent] | C <sub>78</sub> H <sub>84</sub> Cl <sub>4</sub> Cu <sub>4</sub> I <sub>4</sub><br>O <sub>4</sub> P <sub>4</sub> [+ solvent] | C <sub>80</sub> H <sub>80</sub> Cl <sub>4</sub> Cu <sub>4</sub><br>F <sub>12</sub> O <sub>16</sub> P <sub>4</sub> S <sub>4</sub> |
| <b>Mr</b>                              | 1379.28                                                                                                     | 1755.08                                                                                                      | 2112.93                                                                                                                     | 2201.61                                                                                                                          |
| <b>Temperature</b>                     | 100 K                                                                                                       | 100 K                                                                                                        | 100 K                                                                                                                       | 100 K                                                                                                                            |
| <b>Wavelength</b>                      | 0.71703 Å                                                                                                   | 0.71073 Å                                                                                                    | 0.71073 Å                                                                                                                   | 0.71073 Å                                                                                                                        |
| <b>Crystal system</b>                  | Monoclinic                                                                                                  | Triclinic                                                                                                    | Triclinic                                                                                                                   | Monoclinic                                                                                                                       |
| <b>Space group</b>                     | <i>P2<sub>1</sub>/n</i>                                                                                     | <i>P -1</i>                                                                                                  | <i>P -1</i>                                                                                                                 | <i>P2<sub>1</sub>/n</i>                                                                                                          |
| <b>Unit cell dimensions</b>            | <i>a</i> = 16.391(5) Å                                                                                      | <i>a</i> = 11.012(3) Å                                                                                       | <i>a</i> = 11.0314(18) Å                                                                                                    | <i>a</i> = 14.262(4) Å                                                                                                           |
|                                        | <i>b</i> = 10.259(3) Å                                                                                      | <i>b</i> = 13.359(3) Å                                                                                       | <i>b</i> = 13.720(2) Å                                                                                                      | <i>b</i> = 18.863(5) Å                                                                                                           |
|                                        | <i>c</i> = 22.237(7) Å                                                                                      | <i>c</i> = 15.688(4) Å                                                                                       | <i>c</i> = 15.256(2) Å                                                                                                      | <i>c</i> = 17.852(5) Å                                                                                                           |
|                                        | <i>α</i> = 90°                                                                                              | <i>α</i> = 101.991(8) °                                                                                      | <i>α</i> = 102.657(4) °                                                                                                     | <i>α</i> = 90°                                                                                                                   |
|                                        | <i>β</i> = 91.976(9) °                                                                                      | <i>β</i> = 101.226(8) °                                                                                      | <i>β</i> = 101.013(5) °                                                                                                     | <i>β</i> = 107.047(7) °                                                                                                          |
|                                        | <i>γ</i> = 90°                                                                                              | <i>γ</i> = 110.003(7) °                                                                                      | <i>γ</i> = 91.511(5) °                                                                                                      | <i>γ</i> = 90°                                                                                                                   |
| <b>Volume</b>                          | 3737(2)                                                                                                     | 2030.7(9)                                                                                                    | 2205.7 (6)                                                                                                                  | 4592(2)                                                                                                                          |
| <b>Z</b>                               | 1                                                                                                           | 1                                                                                                            | 1                                                                                                                           | 2                                                                                                                                |
| <b>Density (calculated)</b>            | 1.294 g/cm <sup>3</sup>                                                                                     | 1.506 g/cm <sup>3</sup>                                                                                      | 1.591 g/cm <sup>3</sup>                                                                                                     | 1.592 g/cm <sup>3</sup>                                                                                                          |
| <b>Absorption coefficient</b>          | 0.827 mm <sup>-1</sup>                                                                                      | 3.190 mm <sup>-1</sup>                                                                                       | 2.587 mm <sup>-1</sup>                                                                                                      | 1.278 mm <sup>-1</sup>                                                                                                           |
| <b>F(000)</b>                          | 1515.0                                                                                                      | 929.10                                                                                                       | 1040.0                                                                                                                      | 2240.0                                                                                                                           |
| <b>Theta range for data collection</b> | 2.49 to 28.41°                                                                                              | 2.45 to 28.29°                                                                                               | 2.49 to 28.27°                                                                                                              | 2.42 to 26.11°                                                                                                                   |
| <b>Index ranges</b>                    | -19 ≤ <i>h</i> ≤ 19,<br>-12 ≤ <i>k</i> ≤ 12,<br>-26 ≤ <i>l</i> ≤ 26                                         | -14 ≤ <i>h</i> ≤ 14,<br>-17 ≤ <i>k</i> ≤ 17,<br>-21 ≤ <i>l</i> ≤ 21                                          | -14 ≤ <i>h</i> ≤ 14,<br>-18 ≤ <i>k</i> ≤ 18,<br>-20 ≤ <i>l</i> ≤ 20                                                         | -19 ≤ <i>h</i> ≤ 19,<br>-25 ≤ <i>k</i> ≤ 25,<br>-23 ≤ <i>l</i> ≤ 23                                                              |
| <b>Reflections collected</b>           | 128654                                                                                                      | 75600                                                                                                        | 94097                                                                                                                       | 148346                                                                                                                           |

|                                            |                                                                  |                                                               |                                                                  |                                                                  |
|--------------------------------------------|------------------------------------------------------------------|---------------------------------------------------------------|------------------------------------------------------------------|------------------------------------------------------------------|
| <b>Independent reflections</b>             | 6522 [R(int) = 0.0412]                                           | 10201[R(int) = 0.0610]                                        | 11045 [R(int) = 0.0546]                                          | 11846 [R(int) = 0.1024]                                          |
| <b>Coverage of independent reflections</b> | 96.3%                                                            | 99.5%                                                         | 99.6%                                                            | 99.9%                                                            |
| <b>Function minimized</b>                  | $\Sigma w(\text{Fo}^2 - \text{Fc}^2)^2$                          | $\Sigma w(\text{Fo}^2 - \text{Fc}^2)^2$                       | $\Sigma w(\text{Fo}^2 - \text{Fc}^2)^2$                          | $\Sigma w(\text{Fo}^2 - \text{Fc}^2)^2$                          |
| <b>Data / restraints / parameters</b>      | 6522/0/430                                                       | 10201/ 0 / 477                                                | 11045 / 0 / 448                                                  | 11846/ 0 / 584                                                   |
| <b>Goodness-of-fit on F<sup>2</sup></b>    | 1.218                                                            | 1.031                                                         | 1.031                                                            | 1.025                                                            |
| <b><math>\Delta/\sigma</math> max</b>      | 0.002                                                            | 0.001                                                         | 0.001                                                            | 0.001                                                            |
| <b>Final R indices</b>                     | 6308 data[<br>I>2 $\sigma$ (I)],<br>R1 = 0.0309,<br>wR2 = 0.0956 | 7541 data[<br>I>2 $\sigma$ (I)],<br>R1 = 0.0587, wR2 = 0.1401 | 3961 data[<br>I>2 $\sigma$ (I)],<br>R1 = 0.0368,<br>wR2 = 0.0750 | 7743 data[<br>I>2 $\sigma$ (I)],<br>R1 = 0.0460,<br>wR2 = 0.0766 |
|                                            | all data, R1 = 0.0321, wR2 = 0.0964                              | all data, R1 = 0.0884, wR2 = 0.1603                           | all data, R1 = 0.0554, wR2 = 0.0822                              | all data, R1 = 0.0912, wR2 = 0.0897                              |
| <b>Largest diff. peak and hole</b>         | 0.571 and -1.120 eÅ <sup>-3</sup>                                | 1.307 and -1.261eÅ <sup>-3</sup>                              | 1.511 and -1.436 eÅ <sup>-3</sup>                                | 0.737 to -0.694 eÅ <sup>-3</sup>                                 |
| <b>R.M.S. deviation from mean</b>          | 0.164 eÅ <sup>-3</sup>                                           | 0.187 eÅ <sup>-3</sup>                                        | 0.122 eÅ <sup>-3</sup>                                           | 0.091 eÅ <sup>-3</sup>                                           |

|                                        | <b>6</b>                                                                                      | <b>7</b>                                                                                                                                          | <b>8</b>                                                                                                         | <b>9</b>                                                                                                     |
|----------------------------------------|-----------------------------------------------------------------------------------------------|---------------------------------------------------------------------------------------------------------------------------------------------------|------------------------------------------------------------------------------------------------------------------|--------------------------------------------------------------------------------------------------------------|
| <b>Sum Formula</b>                     | C <sub>124</sub> H <sub>120</sub> Cu <sub>4</sub><br>O <sub>4</sub> P <sub>8</sub> [+solvent] | C <sub>214</sub> H <sub>213</sub> B <sub>6</sub> Cl <sub>4</sub><br>Cu <sub>6</sub> F <sub>24</sub> N <sub>12</sub> O <sub>9</sub> P <sub>8</sub> | C <sub>77</sub> H <sub>82</sub> Ag <sub>4</sub> Br <sub>4</sub> Cl <sub>2</sub> O <sub>4</sub><br>P <sub>4</sub> | C <sub>78</sub> H <sub>83</sub> Ag <sub>4</sub> Cl <sub>4</sub> I <sub>4</sub> O <sub>4</sub> P <sub>4</sub> |
| <b>Mr</b>                              | 2176.17                                                                                       | 4388.70                                                                                                                                           | 2017.32                                                                                                          | 2289.21                                                                                                      |
| <b>Temperature</b>                     | 100 K                                                                                         | 100 K                                                                                                                                             | 100 K                                                                                                            | 100 K                                                                                                        |
| <b>Wavelength</b>                      | 0.71703 Å                                                                                     | 0.71073 Å                                                                                                                                         | 0.71703 Å                                                                                                        | 0.71073 Å                                                                                                    |
| <b>Crystal system</b>                  | Monoclinic                                                                                    | Triclinic                                                                                                                                         | Monoclinic                                                                                                       | Monoclinic                                                                                                   |
| <b>Space group</b>                     | <i>C2/c</i>                                                                                   | <i>P-1</i>                                                                                                                                        | <i>C2/c</i>                                                                                                      | <i>C2/c</i>                                                                                                  |
| <b>Unit cell dimensions</b>            | <i>a</i> = 26.715(6) Å                                                                        | <i>a</i> = 13.814(5) Å                                                                                                                            | <i>a</i> = 16.1275(5) Å                                                                                          | <i>a</i> = 27.384(8) Å                                                                                       |
|                                        | <i>b</i> = 23.138(6) Å                                                                        | <i>b</i> = 16.572(6) Å                                                                                                                            | <i>b</i> = 24.4987(8) Å                                                                                          | <i>b</i> = 28.232(8) Å                                                                                       |
|                                        | <i>c</i> = 20.914(5) Å                                                                        | <i>c</i> = 23.261(8) Å                                                                                                                            | <i>c</i> = 21.1870(9) Å                                                                                          | <i>c</i> = 11.836(3) Å                                                                                       |
|                                        | $\alpha = 90^\circ$                                                                           | $\alpha = 93.161(10)^\circ$                                                                                                                       | $\alpha = 90^\circ$                                                                                              | $\alpha = 90^\circ$                                                                                          |
|                                        | $\beta = 93.309(8)^\circ$                                                                     | $\beta = 90.315(11)^\circ$                                                                                                                        | $\beta = 105.565(1)^\circ$                                                                                       | $\beta = 112.454(8)^\circ$                                                                                   |
|                                        | $\gamma = 90^\circ$                                                                           | $\gamma = 103.514(10)^\circ$                                                                                                                      | $\gamma = 90^\circ$                                                                                              | $\gamma = 90^\circ$                                                                                          |
| <b>Volume</b>                          | 12906(5) Å <sup>3</sup>                                                                       | 5169(3) Å <sup>3</sup>                                                                                                                            | 8064.0(1) Å <sup>3</sup>                                                                                         | 8457 (4) Å <sup>3</sup>                                                                                      |
| <b>Z</b>                               | 4                                                                                             | 1                                                                                                                                                 | 4                                                                                                                | 4                                                                                                            |
| <b>Density (calculated)</b>            | 1.120 g/cm <sup>3</sup>                                                                       | 1.410 g/cm <sup>3</sup>                                                                                                                           | 1.662 g/cm <sup>3</sup>                                                                                          | 1.797 g/cm <sup>3</sup>                                                                                      |
| <b>Absorption coefficient</b>          | 0.794 mm <sup>-1</sup>                                                                        | 0.802 mm <sup>-1</sup>                                                                                                                            | 3.130 mm <sup>-1</sup>                                                                                           | 2.620 mm <sup>-1</sup>                                                                                       |
| <b>F(000)</b>                          | 4528.0                                                                                        | 2260.0                                                                                                                                            | 3992.0                                                                                                           | 4440.0                                                                                                       |
| <b>Theta range for data collection</b> | 4.62 to 50°                                                                                   | 4.328 to 50°                                                                                                                                      | 1.996 to 28.370°                                                                                                 | 2.40 to 28.61°                                                                                               |
| <b>Index ranges</b>                    | -31 ≤ <i>h</i> ≤ 31,<br>-27 ≤ <i>k</i> ≤ 27,<br>-24 ≤ <i>l</i> ≤ 24                           | -16 ≤ <i>h</i> ≤ 16,<br>-19 ≤ <i>k</i> ≤ 19,<br>-27 ≤ <i>l</i> ≤ 27                                                                               | -21 ≤ <i>h</i> ≤ 21,<br>-32 ≤ <i>k</i> ≤ 32,<br>-28 ≤ <i>l</i> ≤ 28                                              | -37 ≤ <i>h</i> ≤ 37,<br>-38 ≤ <i>k</i> ≤ 38,<br>-16 ≤ <i>l</i> ≤ 16                                          |
| <b>Reflections collected</b>           | 183866                                                                                        | 178187                                                                                                                                            | 174464                                                                                                           | 192252                                                                                                       |
| <b>Independent reflections</b>         | 11346 [Rint = 0.1787]                                                                         | 18187 [Rint = 0.2358]                                                                                                                             | 10039 [R(int) = 0.0636]                                                                                          | 10813 [R(int) = 0.0533]                                                                                      |
| <b>Coverage of independent</b>         | 99.9%                                                                                         | 99.9%                                                                                                                                             | 99.4%                                                                                                            | 94.1%                                                                                                        |

|                                         |                                                      |                                                        |                                                               |                                                               |
|-----------------------------------------|------------------------------------------------------|--------------------------------------------------------|---------------------------------------------------------------|---------------------------------------------------------------|
| <b>reflections</b>                      |                                                      |                                                        |                                                               |                                                               |
| <b>Function minimized</b>               | $\Sigma w(\text{Fo}^2 - \text{Fc}^2)^2$              | $\Sigma w(\text{Fo}^2 - \text{Fc}^2)^2$                | $\Sigma w(\text{Fo}^2 - \text{Fc}^2)^2$                       | $\Sigma w(\text{Fo}^2 - \text{Fc}^2)^2$                       |
| <b>Data / restraints / parameters</b>   | 11346 / 0 / 637                                      | 18187 / 0 / 1291                                       | 10039 / 0 / 436                                               | 10813 / 0 / 453                                               |
| <b>Goodness-of-fit on F<sup>2</sup></b> | 1.038                                                | 1.074                                                  | 1.071                                                         | 1.126                                                         |
| <b><math>\Delta/\sigma</math> max</b>   | 0.002                                                | 0.001                                                  | 0.002                                                         | 0.002                                                         |
| <b>Final R indices</b>                  | [ I>2 $\sigma$ (I)],<br>R1 = 0.0507,<br>wR2 = 0.1037 | [ I>2 $\sigma$ (I)],<br>R1 = 0.0922, wR2 =<br>= 0.1745 | 8082 data[ I>2 $\sigma$ (I)],<br>R1 = 0.0266, wR2 =<br>0.0535 | 9701 data[ I>2 $\sigma$ (I)],<br>R1 = 0.0348, wR2 =<br>0.0971 |
|                                         | all data, R1 =<br>0.1004, wR2 =<br>0.1241            | all data, R1 =<br>0.1677, wR2 =<br>0.2030              | all data, R1 = 0.0434,<br>wR2 = 0.0588                        | all data , R1 =<br>0.0426, wR2 =<br>0.1036                    |
| <b>Largest diff. peak and hole</b>      | 0.52 and -0.41<br>e $\text{\AA}^{-3}$                | 1.27 and -0.94 e $\text{\AA}^{-3}$                     | 0475 and -0.678 e $\text{\AA}^{-3}$                           | 1.031 and -1.809 e $\text{\AA}^{-3}$                          |
| <b>R.M.S. deviation from mean</b>       | 0.069 e $\text{\AA}^{-3}$                            | 0.116 e $\text{\AA}^{-3}$                              | 0.100 e $\text{\AA}^{-3}$                                     | 0.347 e $\text{\AA}^{-3}$                                     |

|                                        | <b>10</b>                                                                         | <b>11</b>                                                                                                   | <b>12</b>                                                                                                                     |
|----------------------------------------|-----------------------------------------------------------------------------------|-------------------------------------------------------------------------------------------------------------|-------------------------------------------------------------------------------------------------------------------------------|
| <b>Sum Formula</b>                     | C <sub>84</sub> H <sub>95</sub> AgF <sub>6</sub> O <sub>6</sub> P <sub>4</sub> Sb | C <sub>42</sub> H <sub>48</sub> Au <sub>2</sub> Cl <sub>2</sub> O <sub>3</sub> P <sub>2</sub><br>[+solvent] | C <sub>79</sub> H <sub>85</sub> Au <sub>2</sub> Cl <sub>6</sub> F <sub>12</sub> O <sub>4</sub> P <sub>4</sub> Sb <sub>2</sub> |
| <b>Mr</b>                              | 1668.12                                                                           | 1127.59                                                                                                     | 2300.52                                                                                                                       |
| <b>Temperature</b>                     | 100 K                                                                             | 100 K                                                                                                       | 100 K                                                                                                                         |
| <b>Wavelength</b>                      | 0.71073 Å                                                                         | 0.71073 Å                                                                                                   | 0.71073 Å                                                                                                                     |
| <b>Crystal system</b>                  | Triclinic                                                                         | Monoclinic                                                                                                  | Orthorhombic                                                                                                                  |
| <b>Space group</b>                     | <i>P</i> -1                                                                       | <i>P</i> 2 <sub>1</sub> / <i>n</i>                                                                          | <i>Pbca</i>                                                                                                                   |
| <b>Unit cell dimensions</b>            | <i>a</i> = 14.6752(6) Å                                                           | <i>a</i> = 21.921(9) Å                                                                                      | <i>a</i> = 22.657(4) Å                                                                                                        |
|                                        | <i>b</i> = 15.9922(6) Å                                                           | <i>b</i> = 16.939(7) Å                                                                                      | <i>b</i> = 25.548(4) Å                                                                                                        |
|                                        | <i>c</i> = 17.7042(7) Å                                                           | <i>c</i> = 24.632(9) Å                                                                                      | <i>c</i> = 29.827(6) Å                                                                                                        |
|                                        | $\alpha$ = 103.034(2) °                                                           | $\alpha$ = 90°                                                                                              | $\alpha$ = 90°                                                                                                                |
|                                        | $\beta$ = 91.157(2) °                                                             | $\beta$ = 96.918(13)°                                                                                       | $\beta$ = 90°                                                                                                                 |
|                                        | $\gamma$ = 103.181(2) °                                                           | $\gamma$ = 90°                                                                                              | $\gamma$ = 90°                                                                                                                |
| <b>Volume</b>                          | 3930.0(3) Å <sup>3</sup>                                                          | 9080 Å <sup>3</sup>                                                                                         | 17265(6) Å <sup>3</sup>                                                                                                       |
| <b>Z</b>                               | 2                                                                                 | 4                                                                                                           | 8                                                                                                                             |
| <b>Density (calculated)</b>            | 1.410 g/cm <sup>3</sup>                                                           | 1.650 g/cm <sup>3</sup>                                                                                     | 1.770 g/cm <sup>3</sup>                                                                                                       |
| <b>Absorption coefficient</b>          | 0.740 mm <sup>-1</sup>                                                            | 6.677 mm <sup>-1</sup>                                                                                      | 4.340 mm <sup>-1</sup>                                                                                                        |
| <b>F(000)</b>                          | 1718.0                                                                            | 4368.0                                                                                                      | 8968.0                                                                                                                        |
| <b>Theta range for data collection</b> | 2.18 to 22.16°                                                                    | 2.40 to 28.39°                                                                                              | 2.37 to 25.14°                                                                                                                |
| <b>Index ranges</b>                    | -17 ≤ <i>h</i> ≤ 17,<br>-19 ≤ <i>k</i> ≤ 19,<br>-21 ≤ <i>l</i> ≤ 21               | -26 ≤ <i>h</i> ≤ 26,<br>-20 ≤ <i>k</i> ≤ 20,<br>-29 ≤ <i>l</i> ≤ 29                                         | -27 ≤ <i>h</i> ≤ 27,<br>-30 ≤ <i>k</i> ≤ 30,<br>-35 ≤ <i>l</i> ≤ 35                                                           |
| <b>Reflections collected</b>           | 103417                                                                            | 248168                                                                                                      | 74303                                                                                                                         |
| <b>Independent reflections</b>         | 14238 [R(int) = 0.1183]                                                           | 16446 [R(int) = 0.1064]                                                                                     | 15600 [R(int) = 0.1526]                                                                                                       |
| <b>Coverage of independent</b>         | 100%                                                                              | 99.9%                                                                                                       | 99.9%                                                                                                                         |

|                                         |                                                              |                                                               |                                                              |
|-----------------------------------------|--------------------------------------------------------------|---------------------------------------------------------------|--------------------------------------------------------------|
| <b>reflections</b>                      |                                                              |                                                               |                                                              |
| <b>Function minimized</b>               | $\Sigma w(\text{Fo}^2 - \text{Fc}^2)^2$                      | $\Sigma w(\text{Fo}^2 - \text{Fc}^2)^2$                       | $\Sigma w(\text{Fo}^2 - \text{Fc}^2)^2$                      |
| <b>Data / restraints / parameters</b>   | 14238 / 0 / 960                                              | 16446 / 0 / 960                                               | 15600 / 0 / 984                                              |
| <b>Goodness-of-fit on F<sup>2</sup></b> | 1.025                                                        | 1.017                                                         | 1.050                                                        |
| <b><math>\Delta/\sigma</math> max</b>   | 0.001                                                        | 0.001                                                         | 0.001                                                        |
| <b>Final R indices</b>                  | 9144 data [ $I > 2\sigma(I)$ ],<br>R1 = 0.0633, wR2 = 0.1332 | 12689 data [ $I > 2\sigma(I)$ ],<br>R1 = 0.0358, wR2 = 0.0709 | 9480 data [ $I > 2\sigma(I)$ ],<br>R1 = 0.0630, wR2 = 0.0945 |
|                                         | all data, R1 = 0.1178,<br>wR2 = 0.1572                       | all data, R1 = 0.0574,<br>wR2 = 0.0808                        | all data, R1 = 0.1324,<br>wR2 = 0.1126                       |
| <b>Largest diff. peak and hole</b>      | 2.51 to -0.85 eÅ <sup>-3</sup>                               | 1.847 to -1.387 eÅ <sup>-3</sup>                              | 1.740 to -1.475 eÅ <sup>-3</sup>                             |
| <b>R.M.S. deviation from mean</b>       | 0.099 eÅ <sup>-3</sup>                                       | 0.159 eÅ <sup>-3</sup>                                        | 0.203 eÅ <sup>-3</sup>                                       |

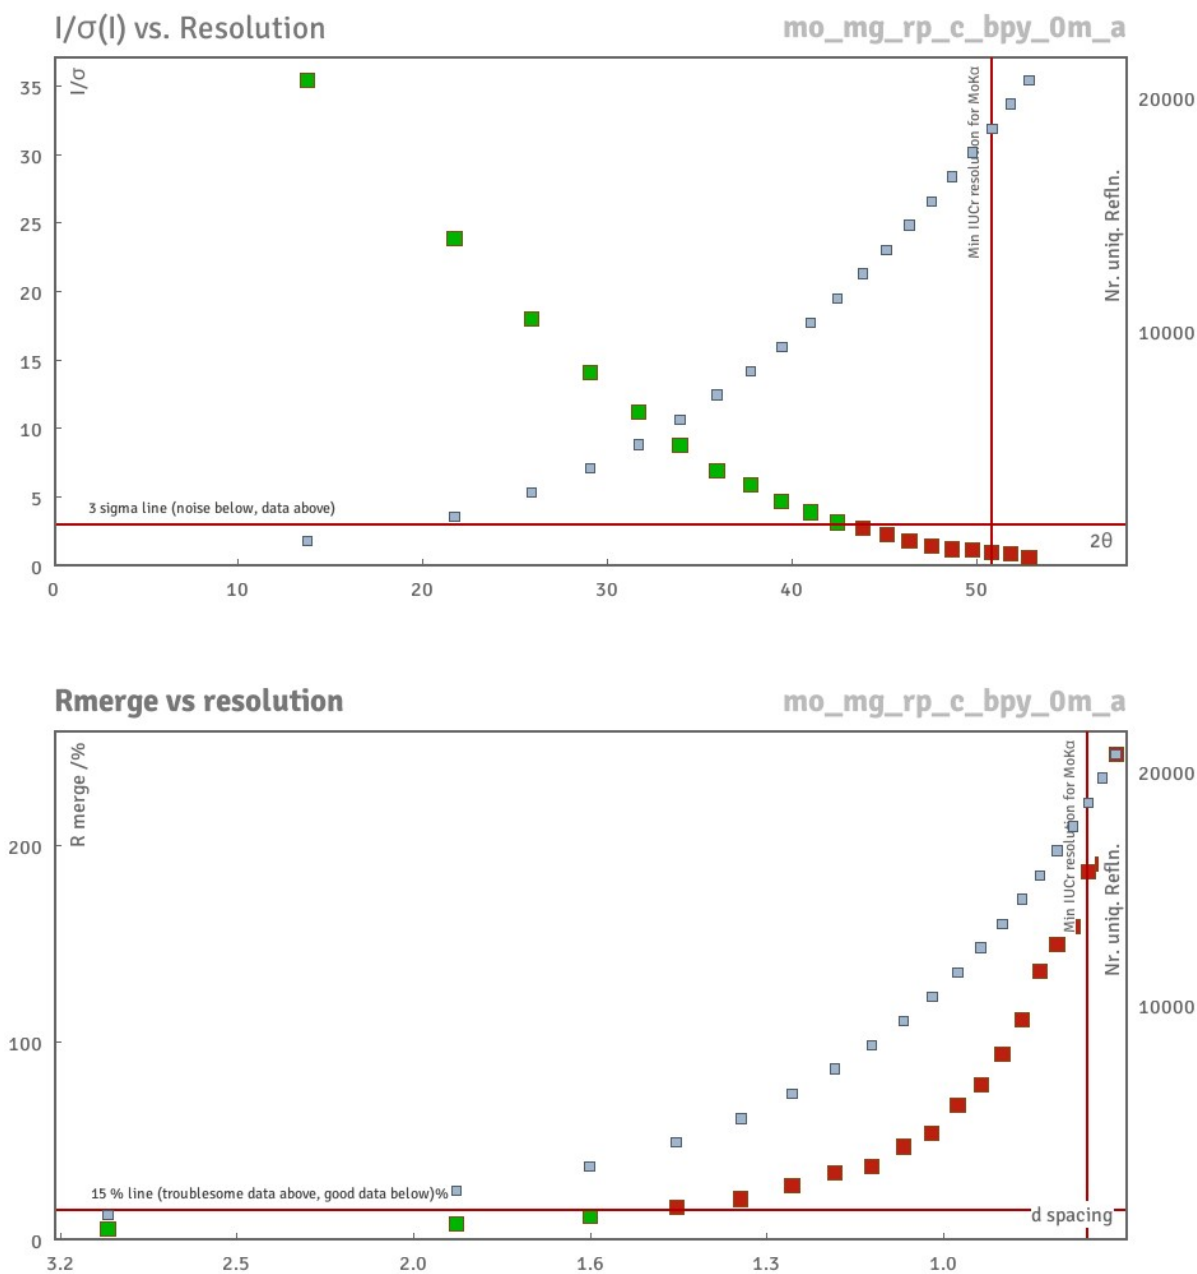

**Figure S27.**  $I/\sigma(I)$  (up) vs. Resolution and Rmerge vs. Resolution (down) for complex 7. Concerning data quality, crystal quality is very poor; hence, that data quality is poor. We usually keep the scan at 0.5 to 1, and the exposure time is about 10-15 sec. depends on spot intensity at 0.84 Å resolution.



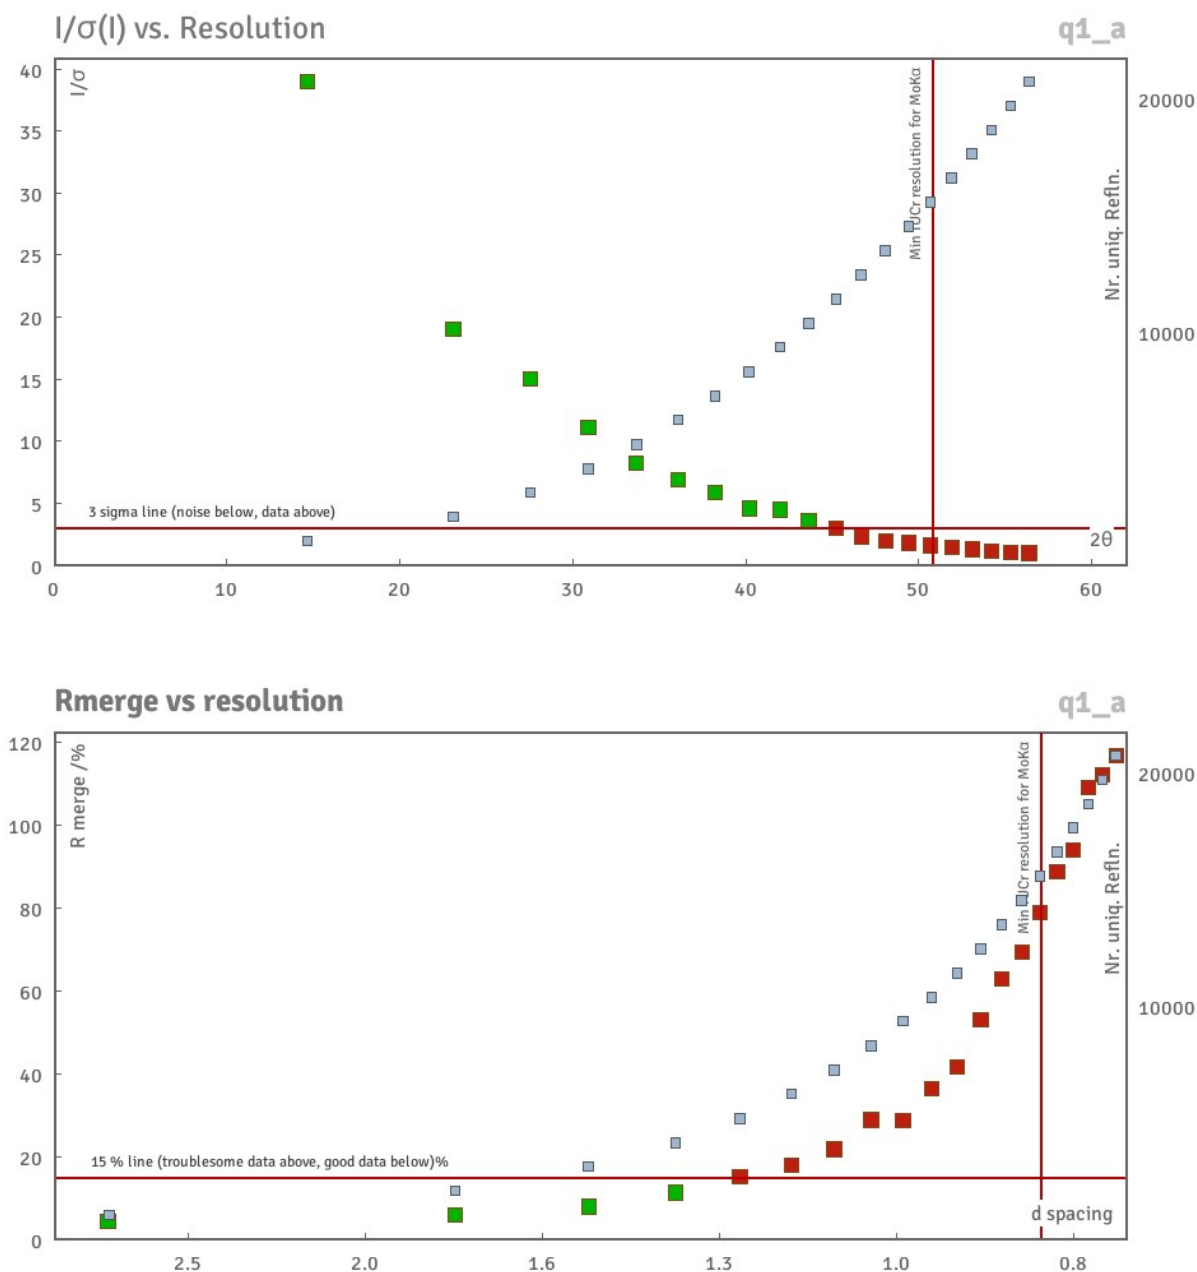

**Figure S28.**  $I/\sigma(I)$  (up) vs. Resolution and Rmerge vs. Resolution (down) for complex **12**. Concerning data quality, crystal quality is very poor; hence, that data quality is poor. We usually keep the scan at 0.5 to 1, with an exposure time of 40-45 sec. depends on spot intensity at 0.84 Å resolution.

#### S4. Photophysical Study

Steady state absorption spectra were recorded on Shimadzu, UV-2600 UV spectrophotometer. Microsecond flash lamp (of 1.5-2.5  $\mu\text{s}$  bandwidth) and Edinburgh FLS980 instrument were

used during phosphorescence decay collection, and phosphorescence spectra measurement for complexes 4, 6, and 7 at 298 K. Steady State PL and lifetime was measured using an Edinburgh Instruments FS5 spectro-fluorometer and Xenon lamp for complexes 2, 3, 4 (variable temperature), 11 and 12.

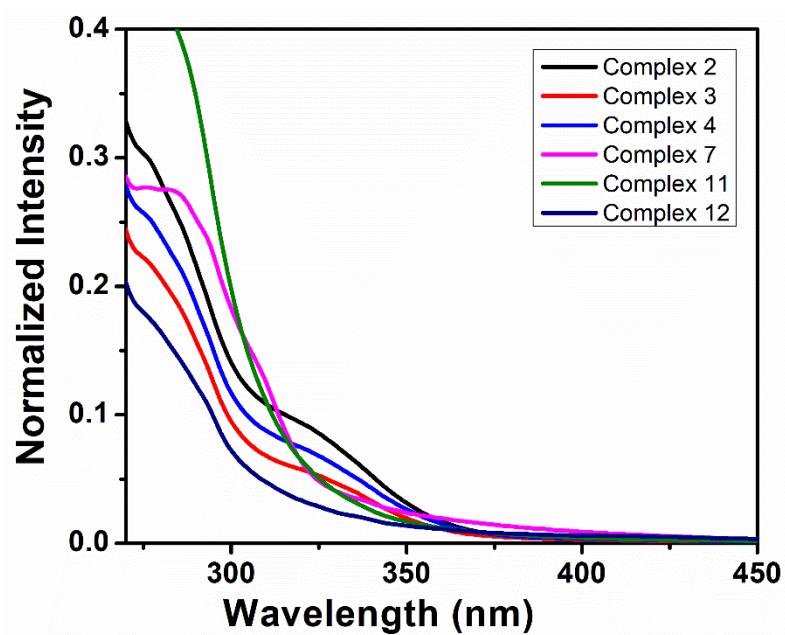

**Figure S29.** UV-visible spectra of Complexes 2-4, 7, 11, 12 in THF.

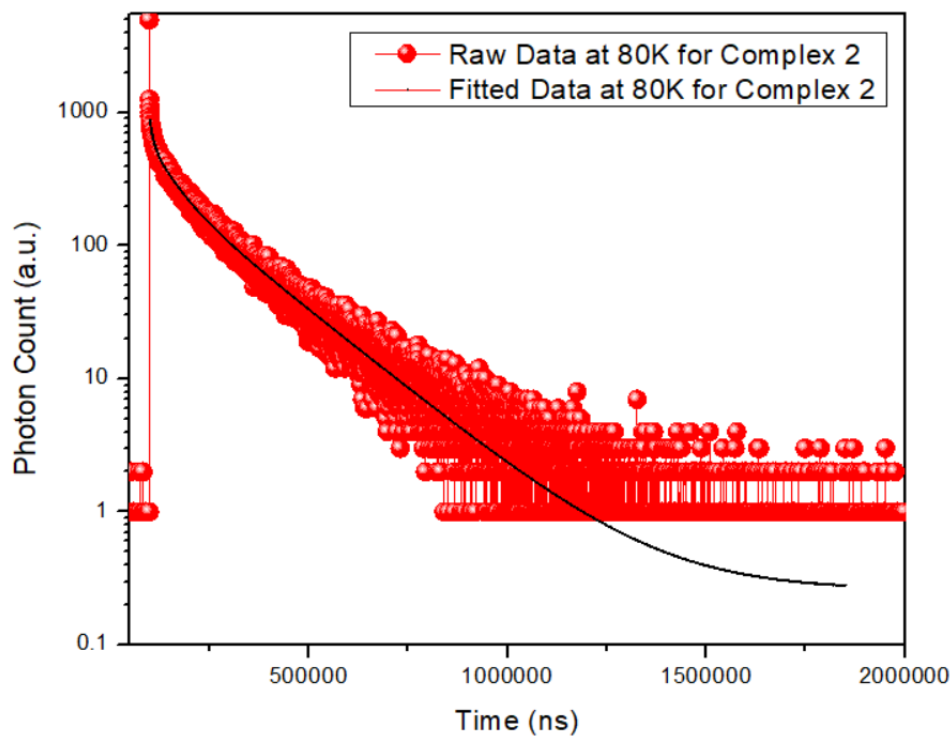

**Figure S30.** Decay profile for complex 2 at 80 K

Fit Results for complex 2

Fit:  $A+B_1\exp(-t/\tau_1)+B_2\exp(-t/\tau_2)+B_3\exp(-t/\tau_3)$

**T=80.00K**

| <u>Parameter</u> | <u>Value</u> | <u>Std. Dev.</u> | <u>Rel %</u> |
|------------------|--------------|------------------|--------------|
| $\tau_1$         | 8.106E-006 s | 6.037E-007 s     |              |
| $\tau_2$         | 5.283E-005 s | 1.990E-006 s     |              |
| $\tau_3$         | 1.817E-004 s | 1.194E-006 s     |              |
| B1               | 300.2333     | 11.8793          | 3.38         |
| B2               | 296.3012     | 7.9292           | 21.75        |
| B3               | 296.5236     | 4.9270           | 74.87        |
| A                | 0.2593       |                  |              |
| $\chi^2$         | 0.7908       |                  |              |

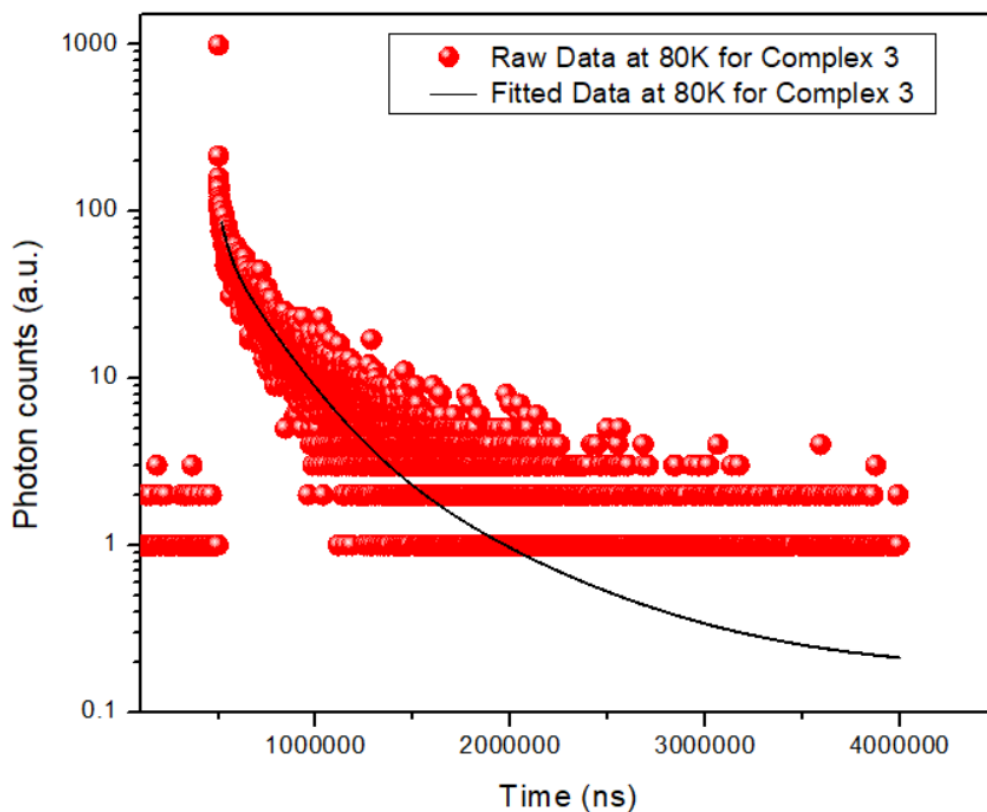

**Figure S31.** Decay profile for complex **3** at 80 K

Fit Results for complex 3

Fit:  $A+B1\exp(-t/\tau_1) + B2\exp(-t/\tau_2) + B3\exp(-t/\tau_3)$

**T=80.00K**

| <u>Parameter</u> | <u>Value</u> | <u>Std. Dev.</u> | <u>Rel %</u> |
|------------------|--------------|------------------|--------------|
| $\tau_1$         | 3.728E-005 s | 5.451E-006 s     |              |
| $\tau_2$         | 2.198E-004 s | 1.447E-005 s     |              |
| $\tau_3$         | 6.665E-004 s | 1.103E-004 s     |              |
| B1               | 30.6288      | 2.5384           | 7.02         |
| B2               | 48.2907      | 1.7237           | 65.30        |
| B3               | 6.7503       | 2.2511           | 27.68        |
| A                | 0.1752       |                  |              |
| $\chi^2$         | 0.6632       |                  |              |

### Fit Results for complex 4

Fit:  $A+B1\exp(-t/\tau_1)+B2\exp(-t/\tau_2)$

**T=80.00K**

| <u>Parameter</u> | <u>Value</u> | <u>Std. Dev.</u> | <u>Rel %</u> |
|------------------|--------------|------------------|--------------|
| $\tau_1$         | 3.976E-006 s | 2.161E-007 s     |              |
| $\tau_2$         | 2.275E-005 s | 3.449E-007 s     |              |
| B1               | 126.0995     | 4.2370           | 20.57        |
| B2               | 85.0581      | 2.2877           | 79.43        |
| A                | 0.3369       |                  |              |
| $\chi^2$         | 0.6961       |                  |              |

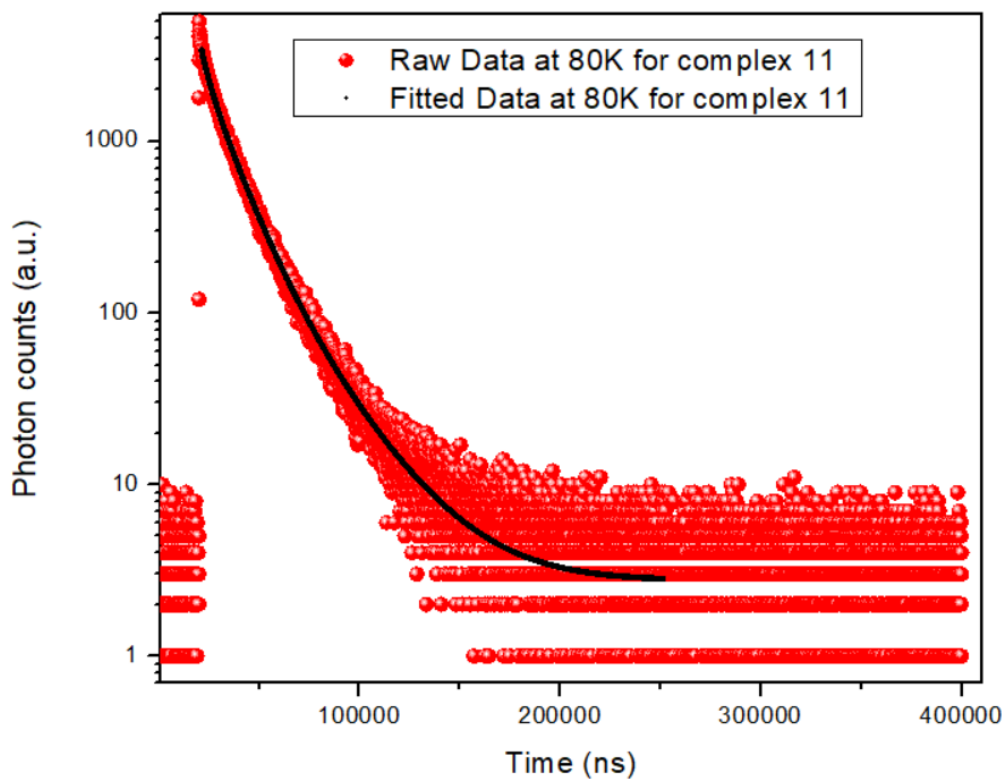

**Figure S32.** Decay profile for complex 11 at 80 K

### Fit Results for complex 11

Fit:  $A+B_1\exp(-t/\tau_1)+B_2\exp(-t/\tau_2)+B_3\exp(-t/\tau_3)$

**T=80.00K**

| <u>Parameter</u> | <u>Value</u> | <u>Std. Dev.</u> | <u>Rel %</u> |
|------------------|--------------|------------------|--------------|
| $\tau_1$         | 3.668E-006 s | 2.113E-007 s     |              |
| $\tau_2$         | 1.224E-005 s | 3.206E-007 s     |              |
| $\tau_3$         | 2.762E-005 s | 1.029E-006 s     |              |
| B1               | 941.5818     | 54.8272          | 7.94         |
| B2               | 2334.9937    | 33.9138          | 65.64        |
| B3               | 416.2686     | 52.9845          | 26.42        |
| A                | 5.6839       |                  |              |
| $\chi^2$         | 1.1185       |                  |              |

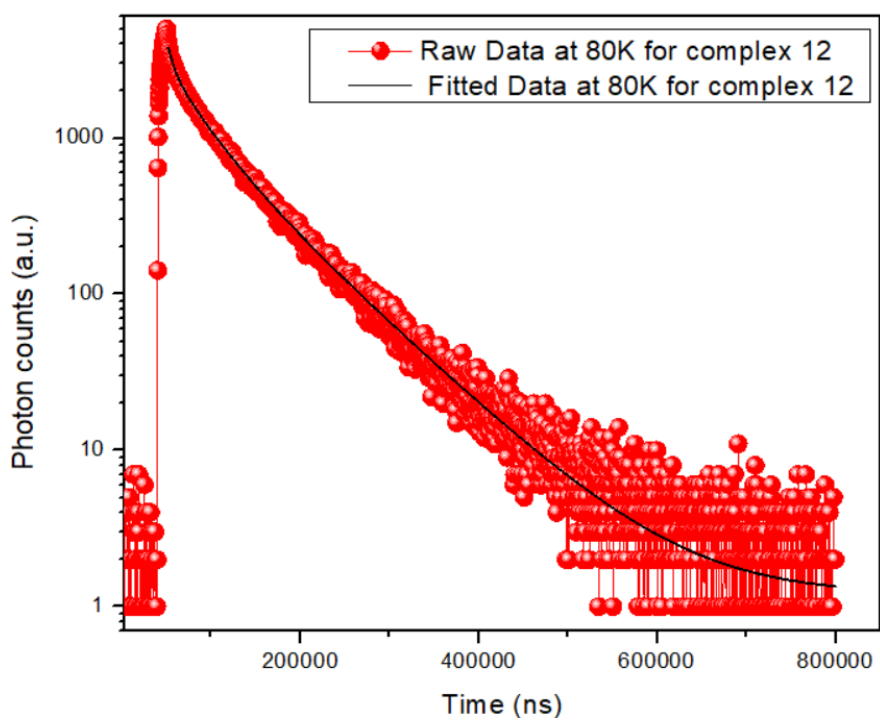

**Figure S33.** Decay profile for complex **12** at 80 K

Fit Results for complex 12

**T=80.00K**

Fit:  $A+B_1\exp(-t/\tau_1)+B_2\exp(-t/\tau_2)+B_3\exp(-t/\tau_3)$

| <u>Parameter</u> | <u>Value</u> | <u>Std. Dev.</u> | <u>Rel %</u> |
|------------------|--------------|------------------|--------------|
| $\tau_1$         | 7.061E-006 s | 5.189E-007 s     |              |
| $\tau_2$         | 3.571E-005 s | 1.449E-006 s     |              |
| $\tau_3$         | 8.260E-005 s | 9.529E-007 s     |              |
| B1               | 1052.1160    | 46.0087          | 4.39         |
| B2               | 1532.7595    | 38.5037          | 32.38        |
| B3               | 1294.0853    | 53.7412          | 63.23        |
| A                | 1.1936       |                  |              |
| $\chi^2$         | 1.0896       |                  |              |

## S5. Powder X-Ray Diffraction (PXRD) patterns of complex 2-4, 6 and 12

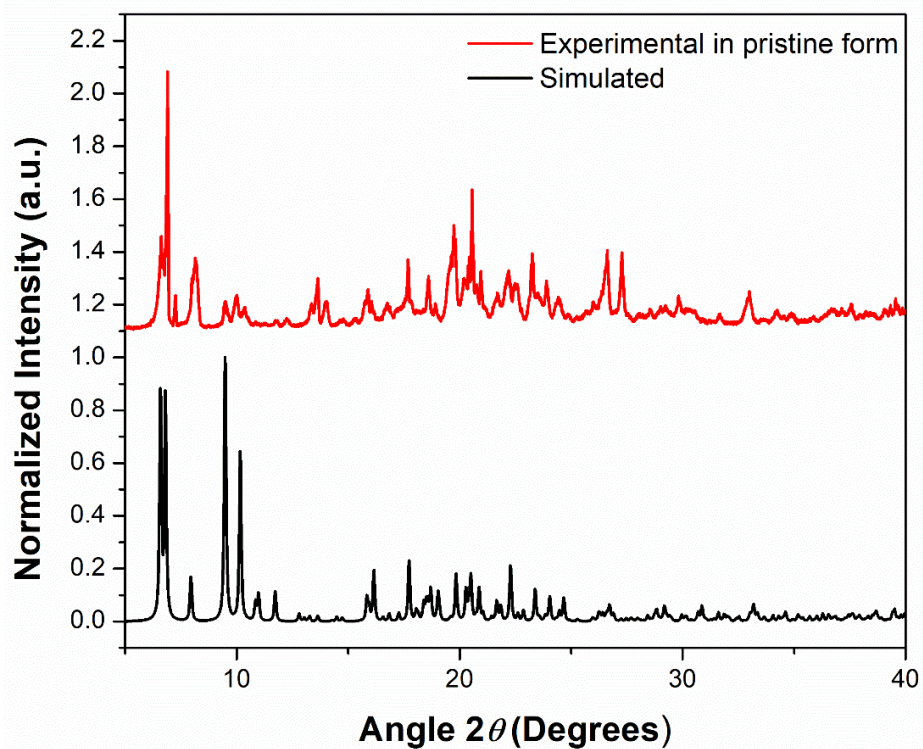

Figure S34. PXRD pattern of complex 2 at 298 K

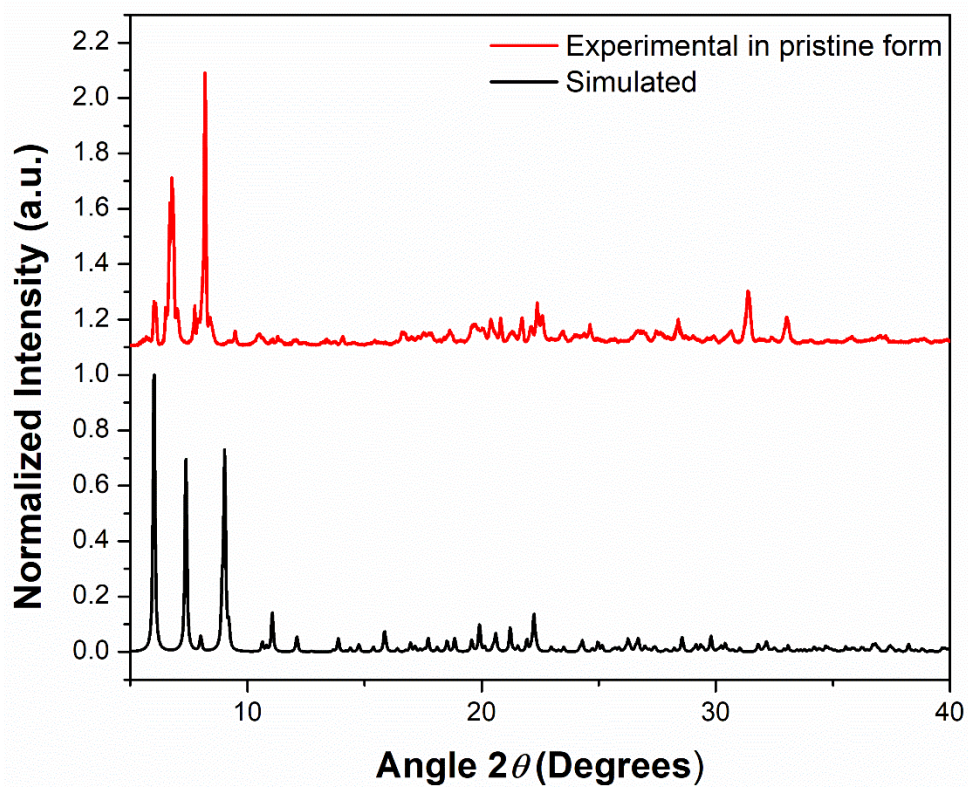

Figure S35. PXRD pattern of complex 3 at 298 K



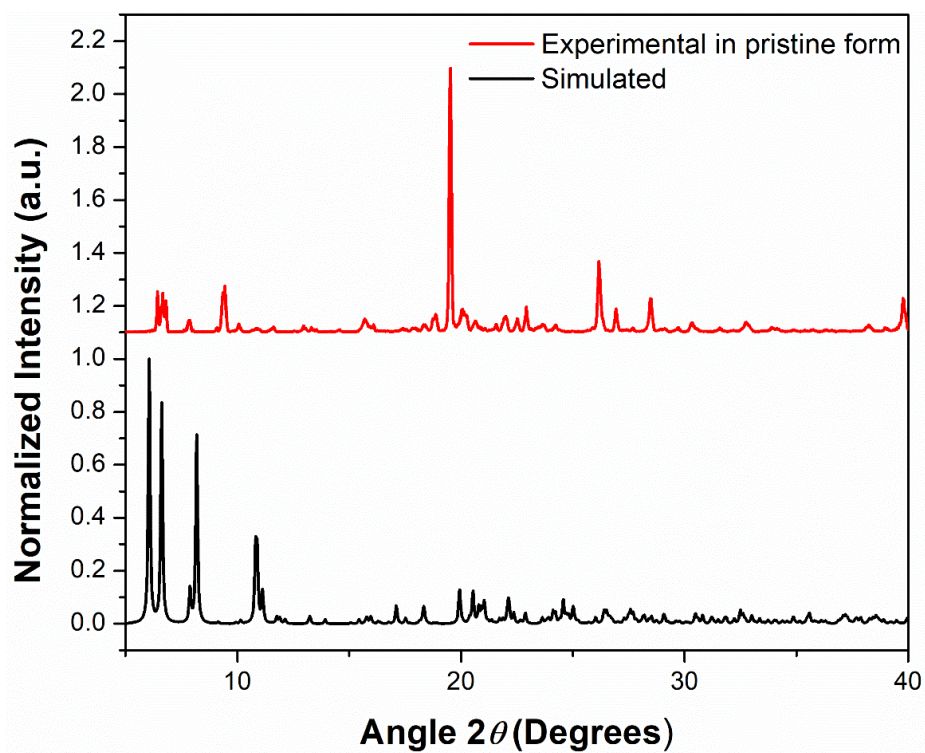

Figure S36. PXRD pattern of complex 4 at 298 K

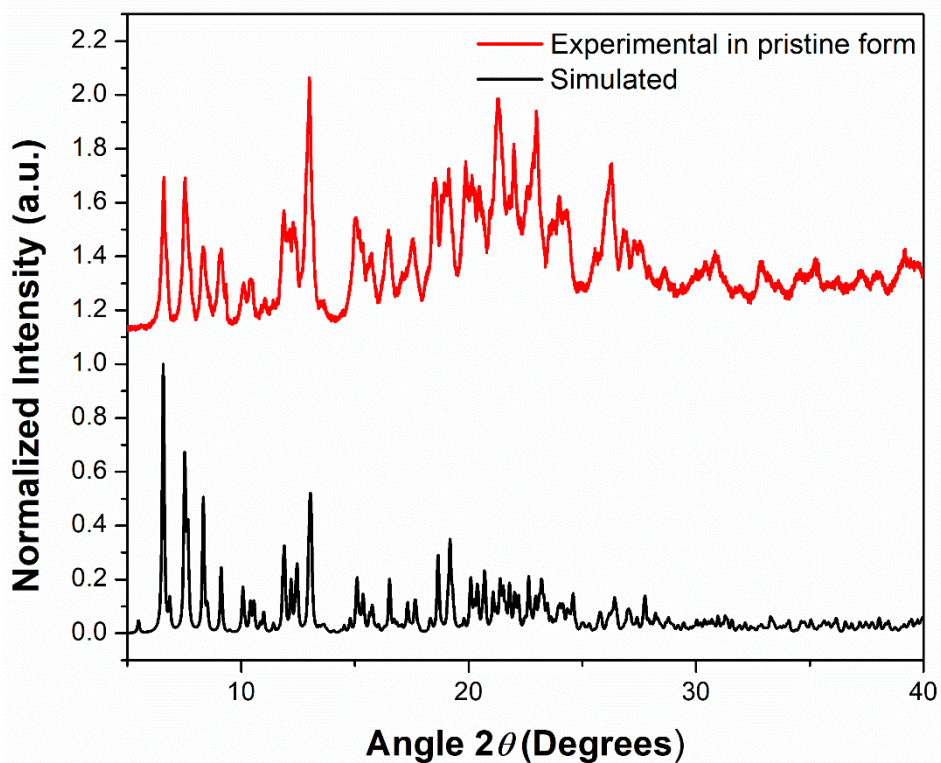

Figure S37. PXRD pattern of complex 6 at 298 K

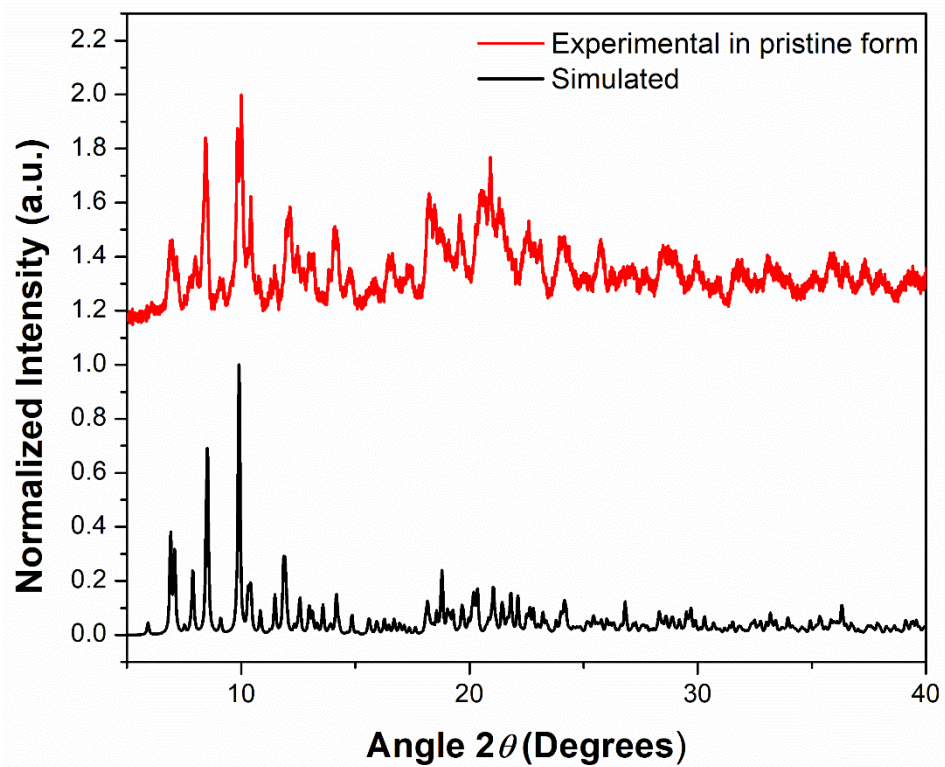

**Figure S38.** PXRD pattern of complex 12 at 298 K

## S6. Mass Spectrometric Data for complexes 2-12

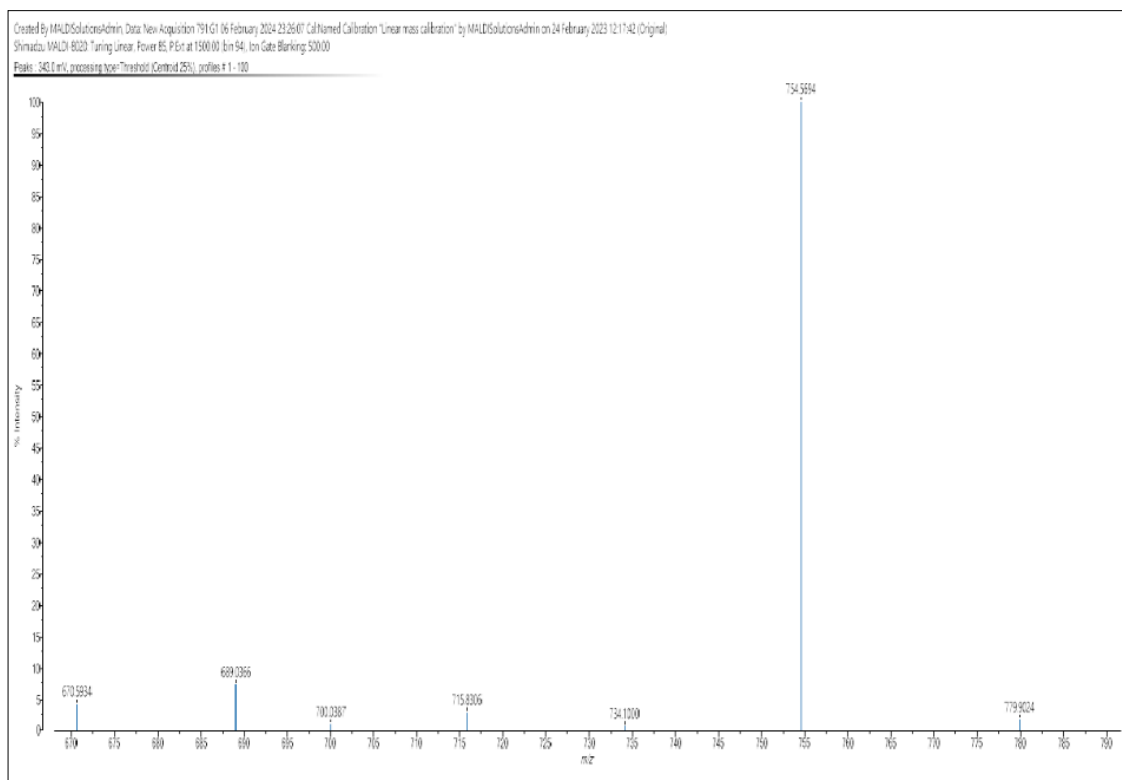

Figure S39. MALDI-TOF data of Complex 2

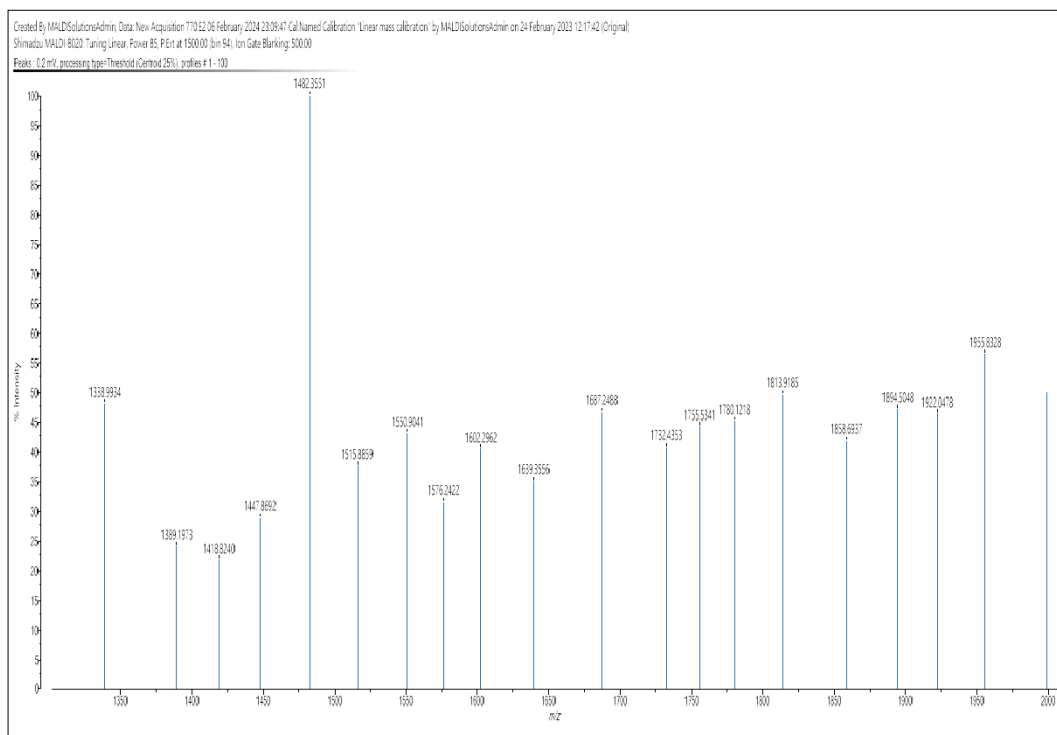

Figure S40. MALDI-TOF data of Complex 3

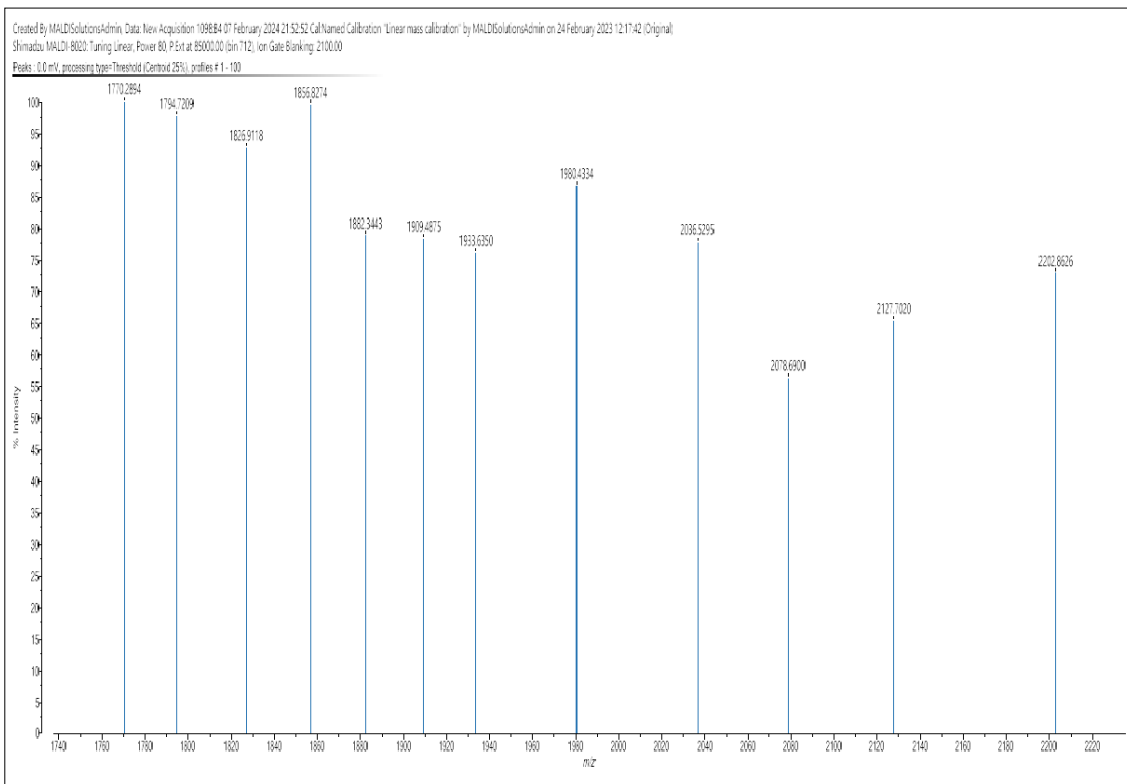

**Figure S41.** MALDI-TOF data of Complex 4

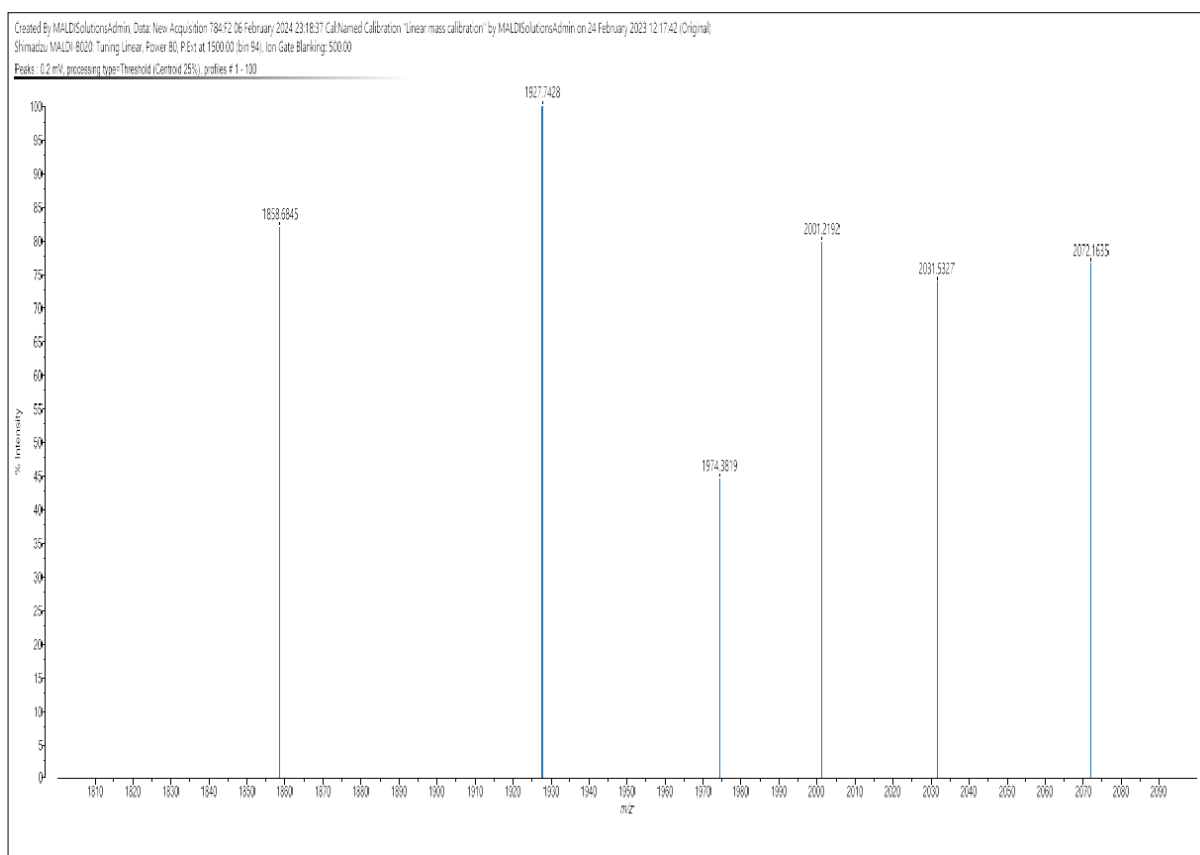

**Figure S42.** MALDI-TOF data of Complex 5

Created by MALDI Solutions Admin, Data: New Acquisition 1103.C1 07 February 2024 21:56:03 Cal: Named Calibration "Linear mass calibration" by MALDI Solutions Admin on 24 February 2023 12:17:42 (Original)  
Shimadzu MALDI-8020 Tuning: Linear, Power 90, P. Exit at 8500.00 (bin 712), Ion Gate Blanking: 2100.00

Peaks: 0.1 mV, processing type: Threshold (Central 25%), profiles # 1 - 100

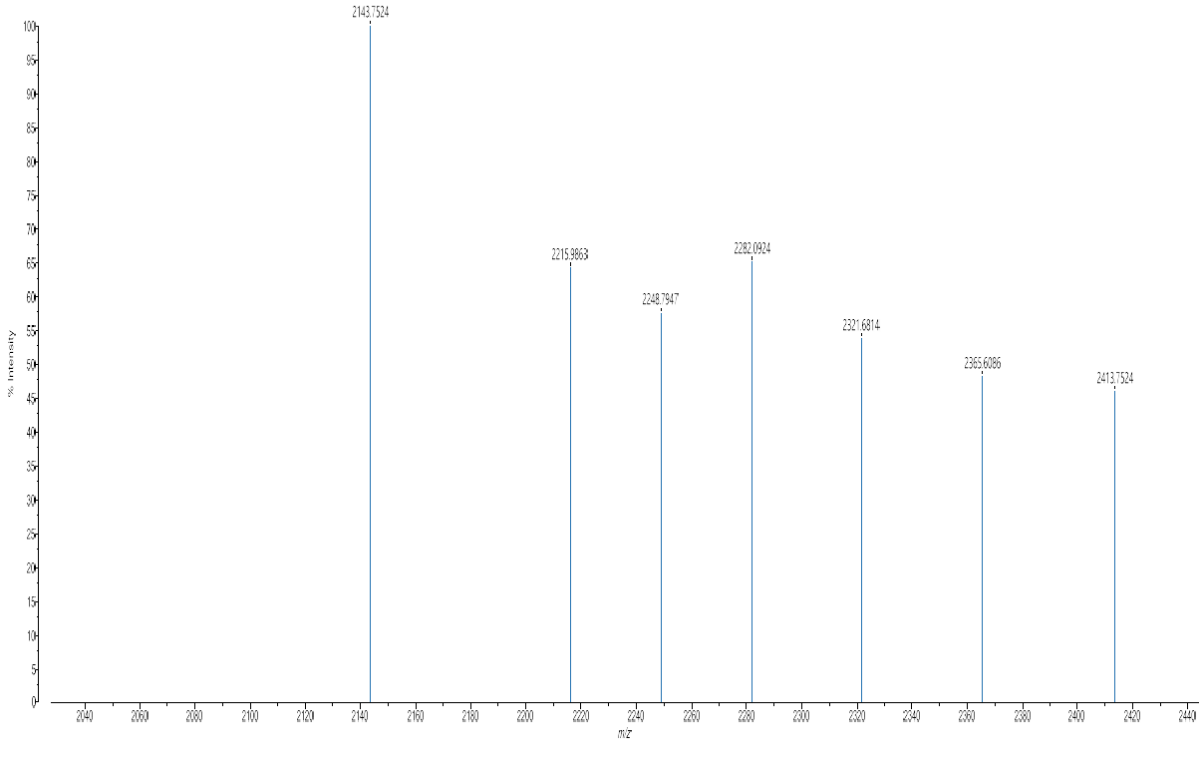

**Figure S43.** MALDI-TOF data of Complex 6

Created by MALDI Solutions Admin, Data: New Acquisition 839.K1 07 February 2024 00:09:23 Cal: Named Calibration "Linear mass calibration" by MALDI Solutions Admin on 24 February 2023 12:17:42 (Original)  
Shimadzu MALDI-8020 Tuning: Linear, Power 100, P. Exit at 1500.00 (bin 94), Ion Gate Blanking: 500.00

Peaks: 0.1 mV, processing type: Threshold (Central 25%), profiles # 1 - 100

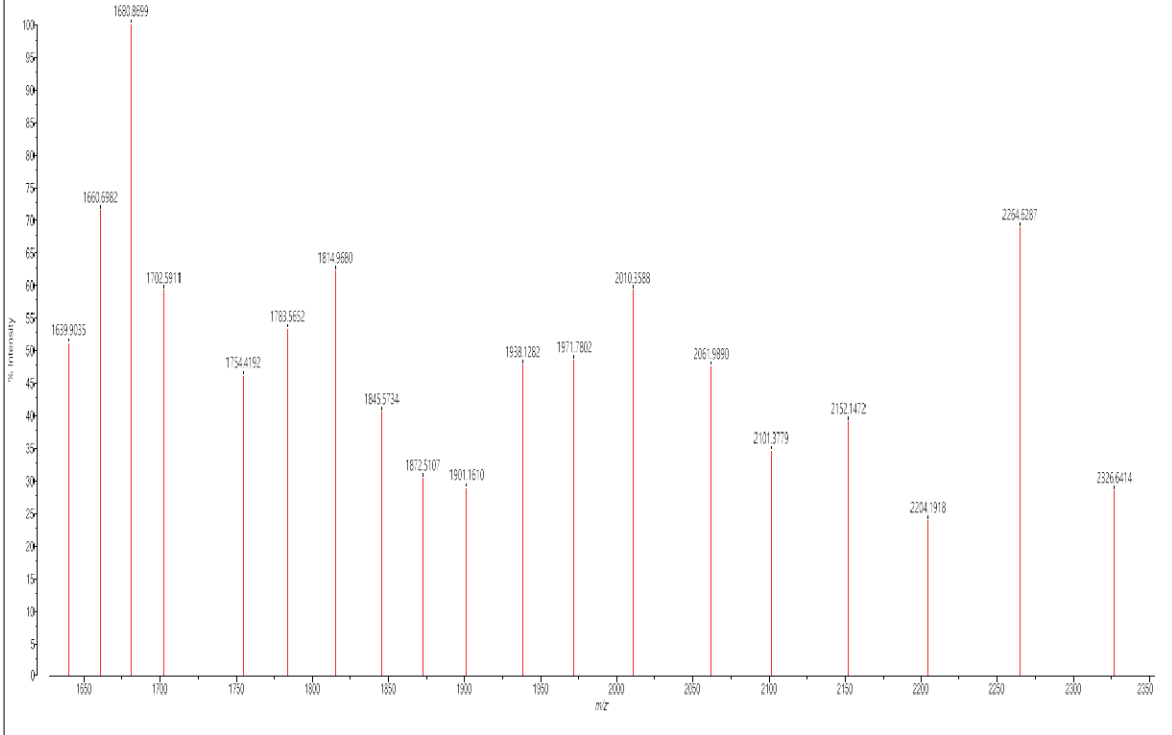

**Figure S44.** MALDI-TOF data of Complex 7

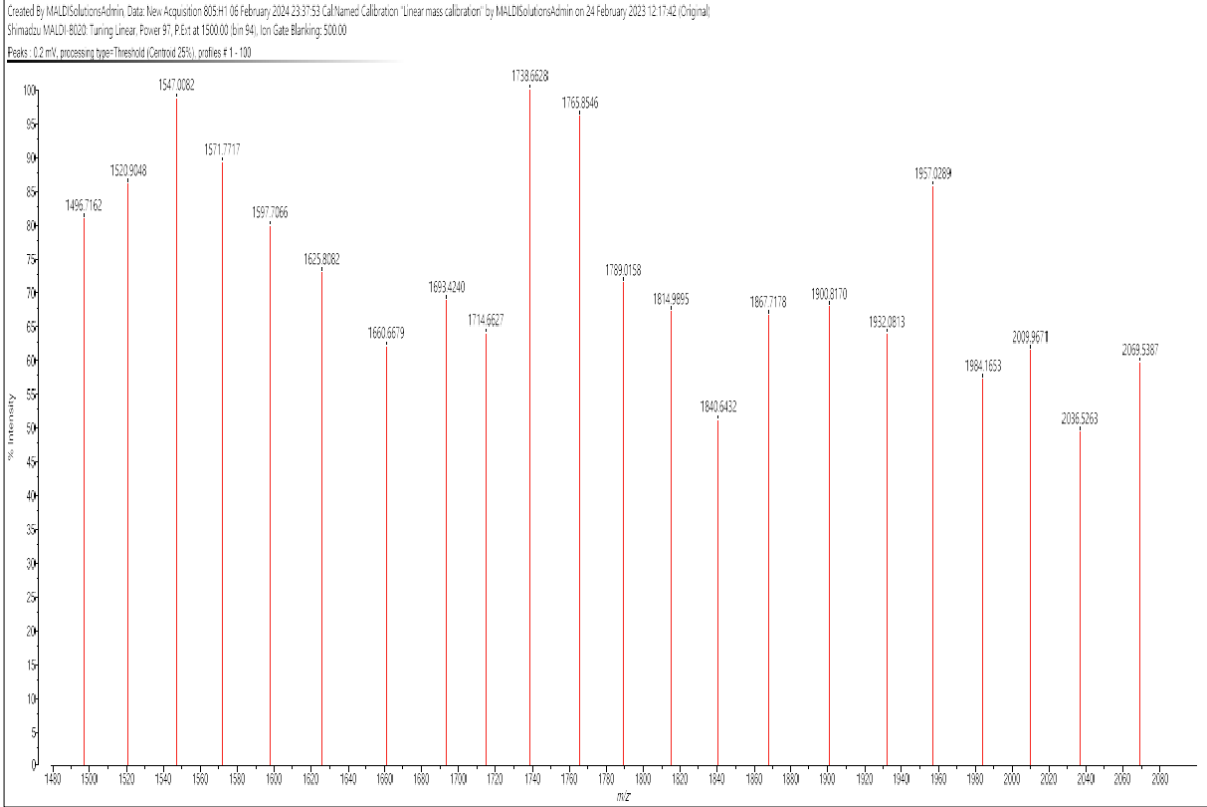

**Figure S45.** MALDI-TOF data of Complex 8

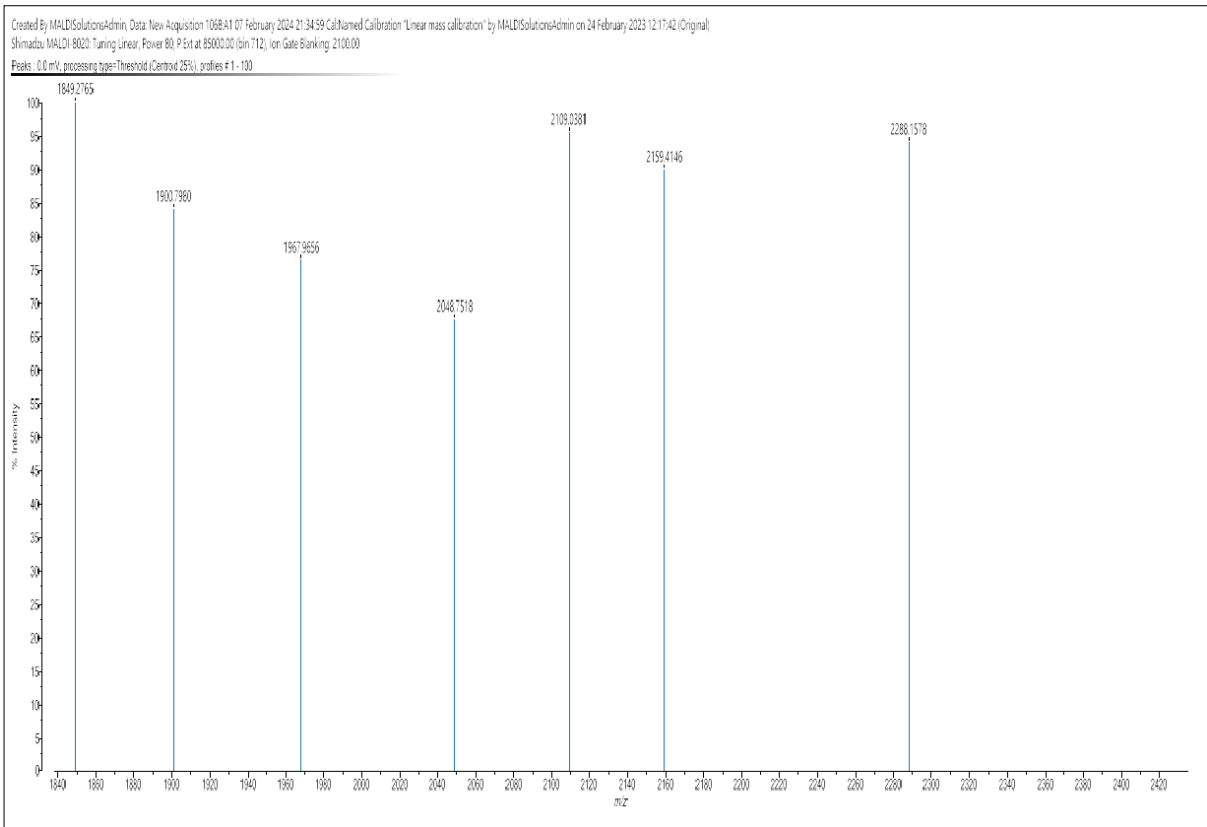

**Figure S46.** MALDI-TOF data of Complex 9

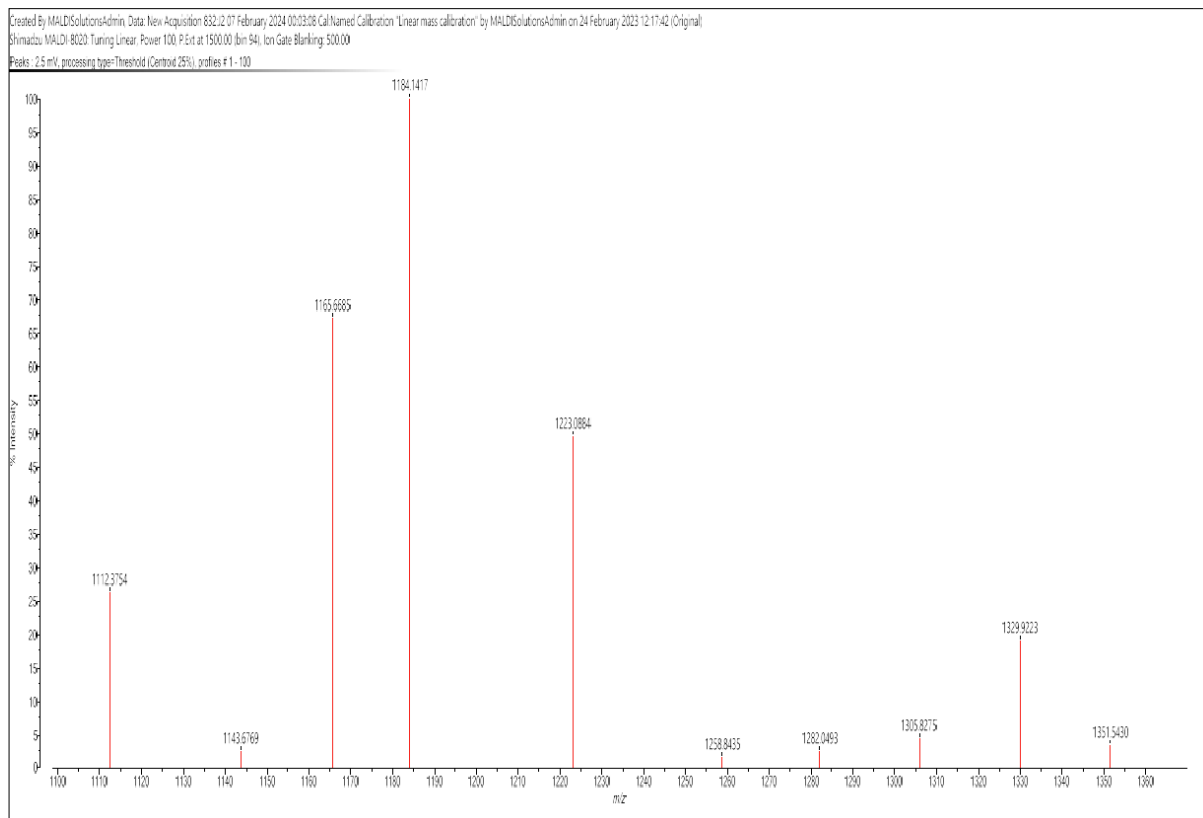

**Figure S47.** MALDI-TOF data of Complex **10**

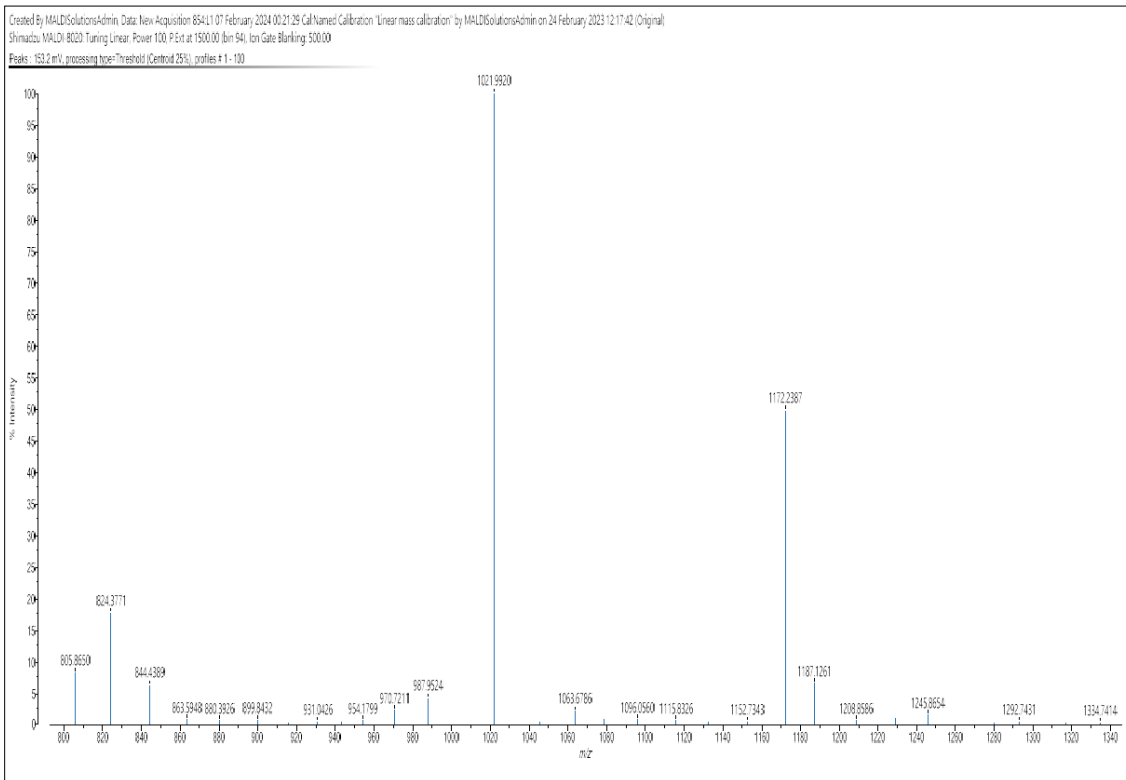

**Figure**

**re S48. MALDI-TOF data of Complex 11**

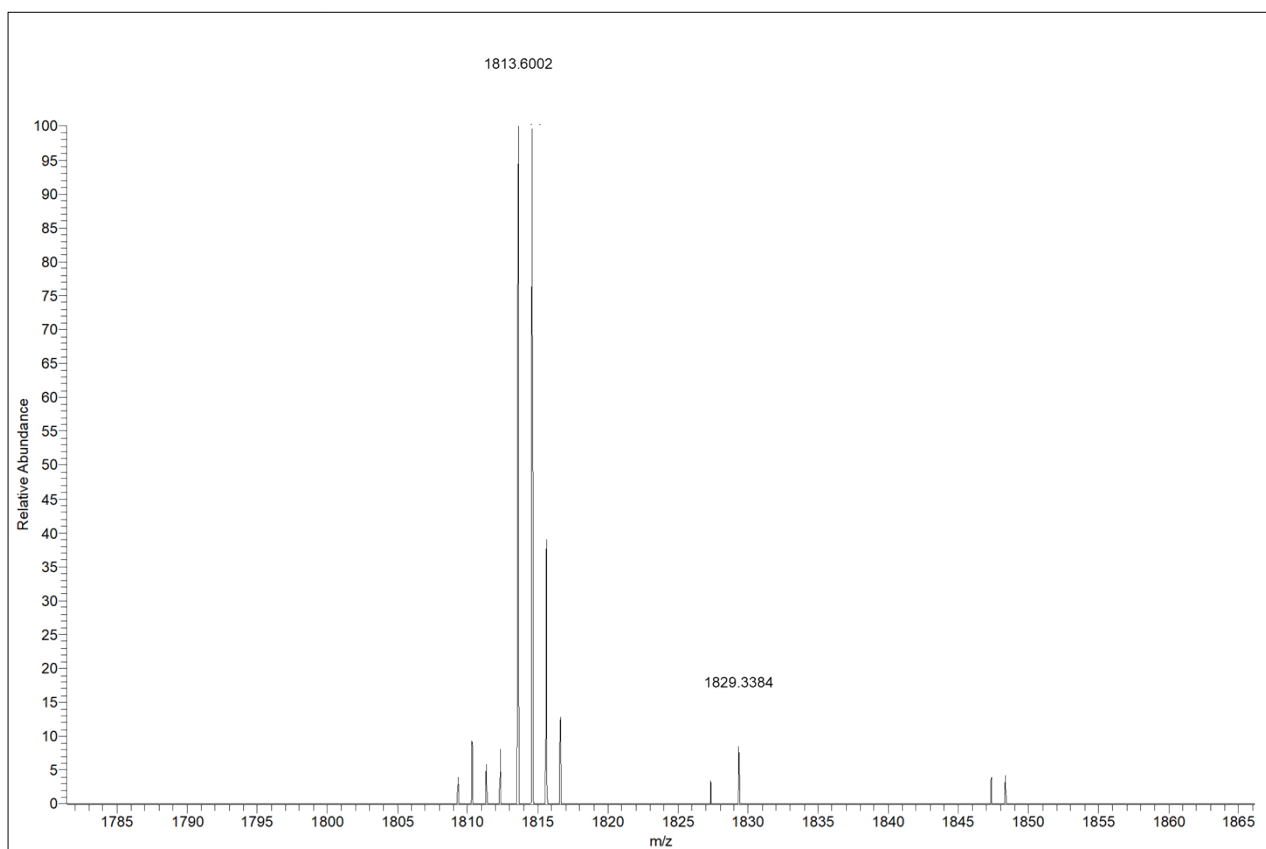

**Figure S49. ESI-MS data of Complex 12**



## S7. Quantum Chemical Calculation for Complexes 2-4, 6, 7, 11, and 12

Co-ordinates from crystal structures are used as initial geometries for obtaining the ground state ( $S_0$ ) optimized geometries of these complexes. The Gaussian 09 program package was used to perform these calculations.<sup>5</sup> All these calculations are performed at the Grimme's dispersion corrected B3LYP functional (B3LYP-D3) using a def2-SVP basis set with ultrafine numerical integration grid and tight convergence criteria. Harmonic vibrational frequencies of these  $S_0$  geometries were obtained to ensure the local minima of optimized structures. These geometries were further used to perform the TDDFT calculations to obtain further insights into the various singlet/triplet excited states, such as energies of excited states, oscillator strengths, and optical excitations.

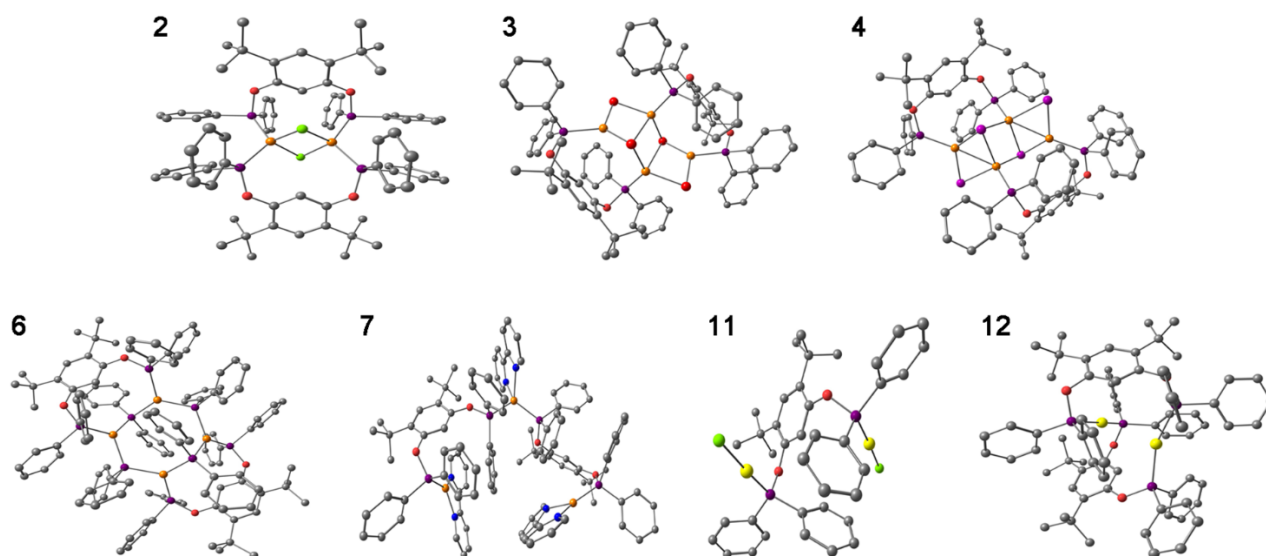

**Figure S50.** Ground state ( $S_0$ ) optimized geometries of the complexes 2-4, 6, 7, 11, and 12 calculated at the B3LYP-D3/def2-SVP level.

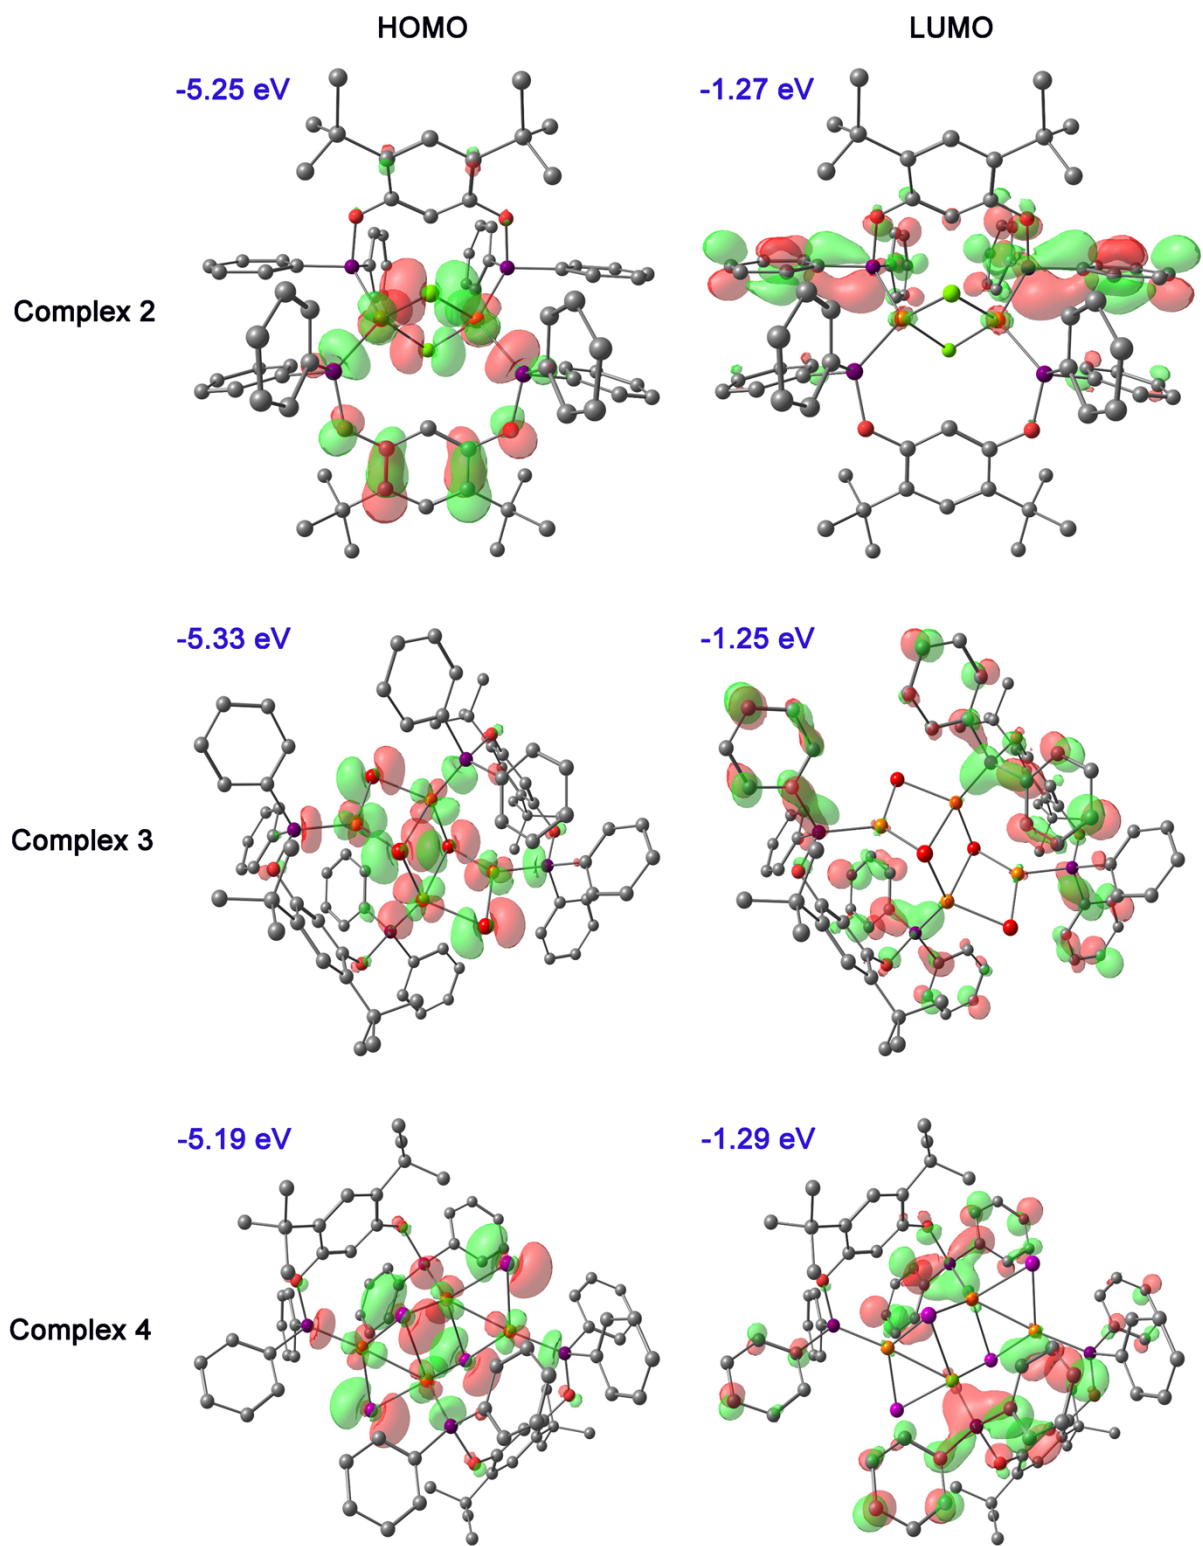

**Figure S51.** HOMO and LUMO of complexes 2-4 at ground state.

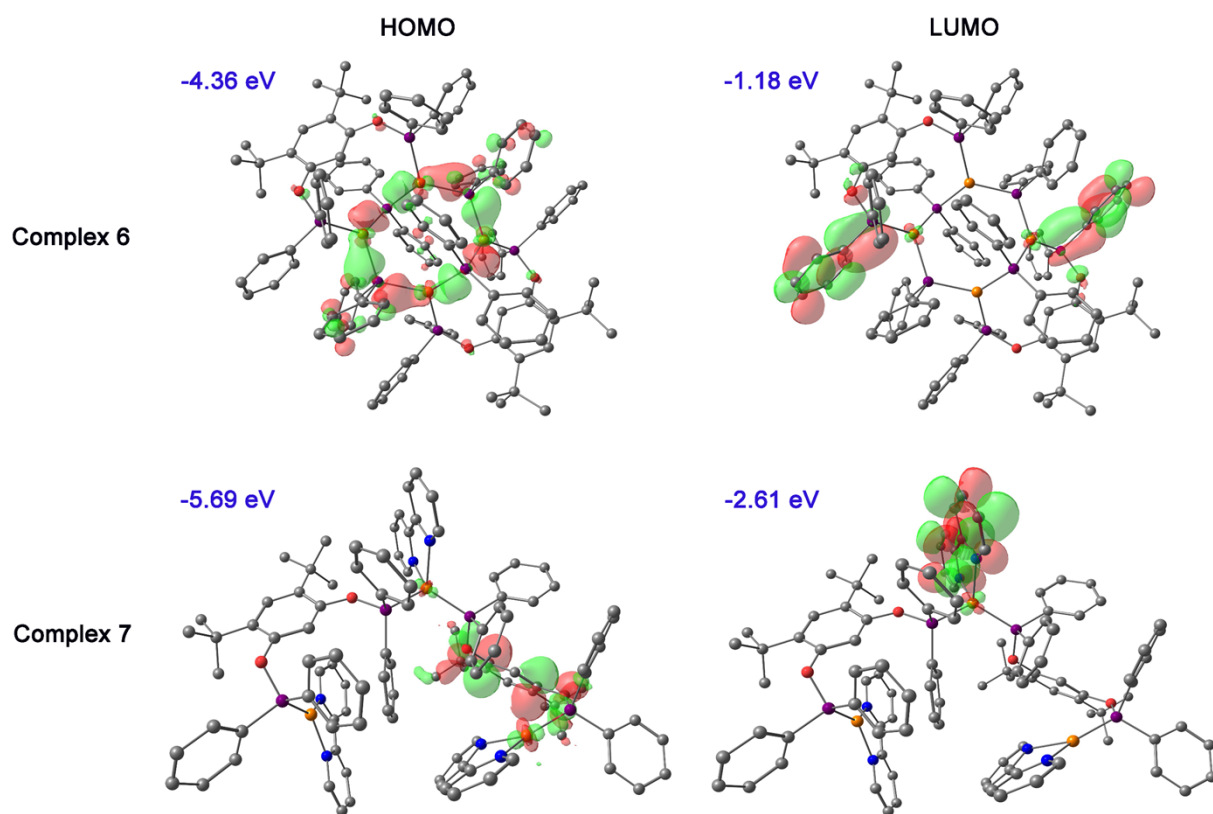

**Figure S52.** HOMO and LUMO of complexes **6** and **7** at ground state.

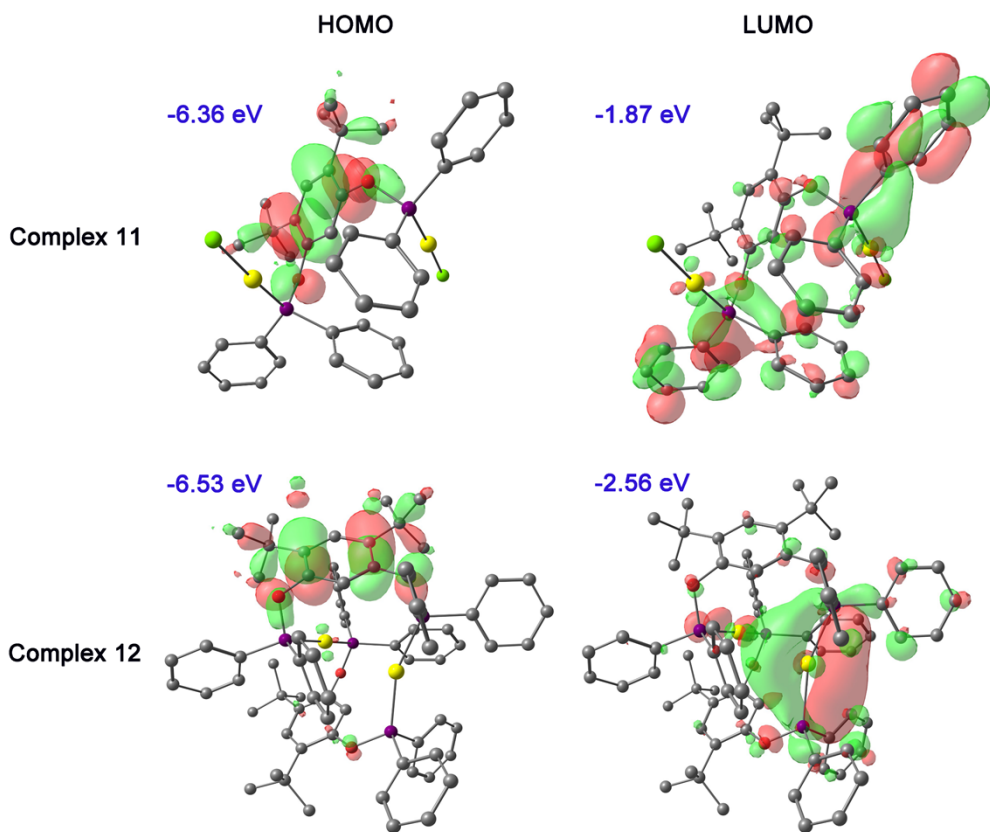

**Figure S53.** HOMO and LUMO of complexes **11** and **12** at the ground state.

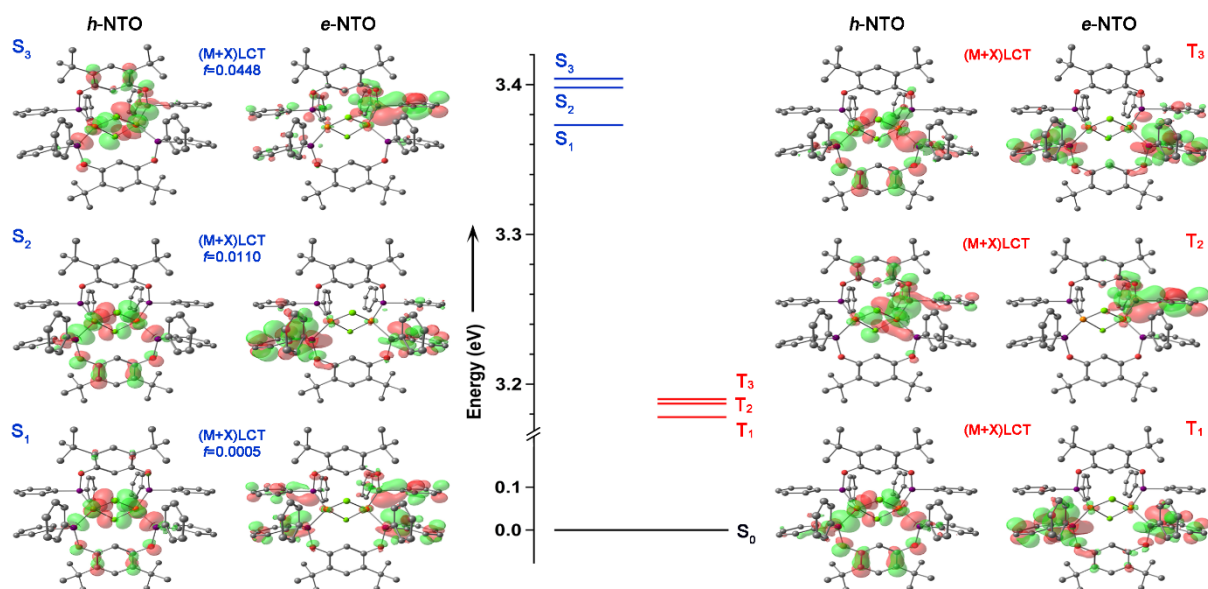

**Figure S54.** NTO analysis for complex **2**.

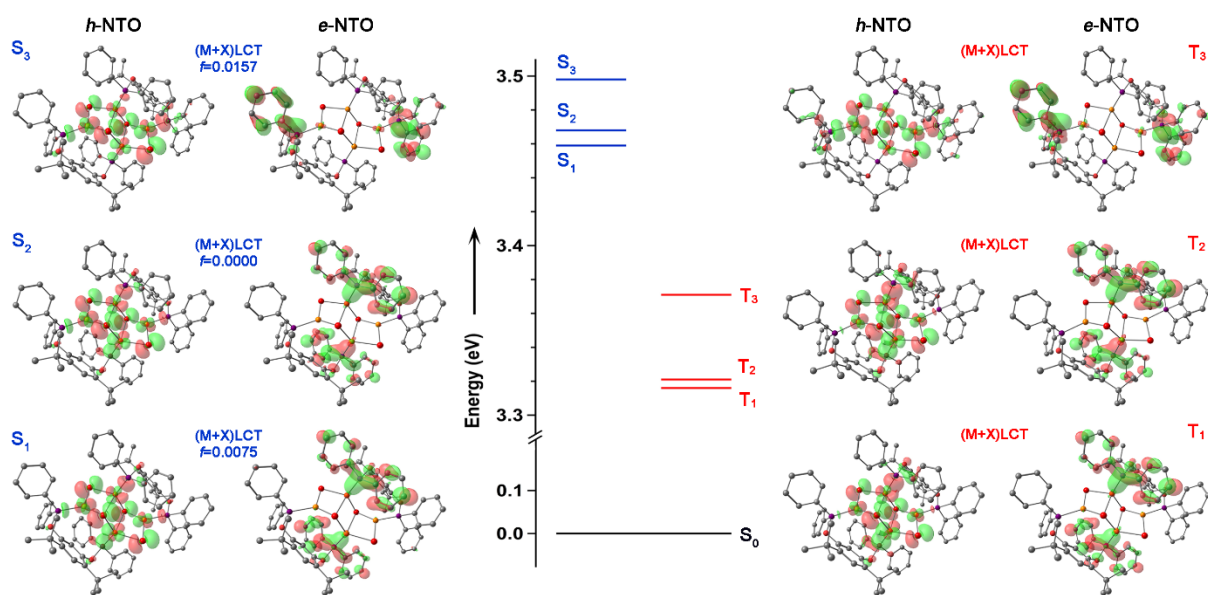

Figure S55. NTO analysis for complex 3.

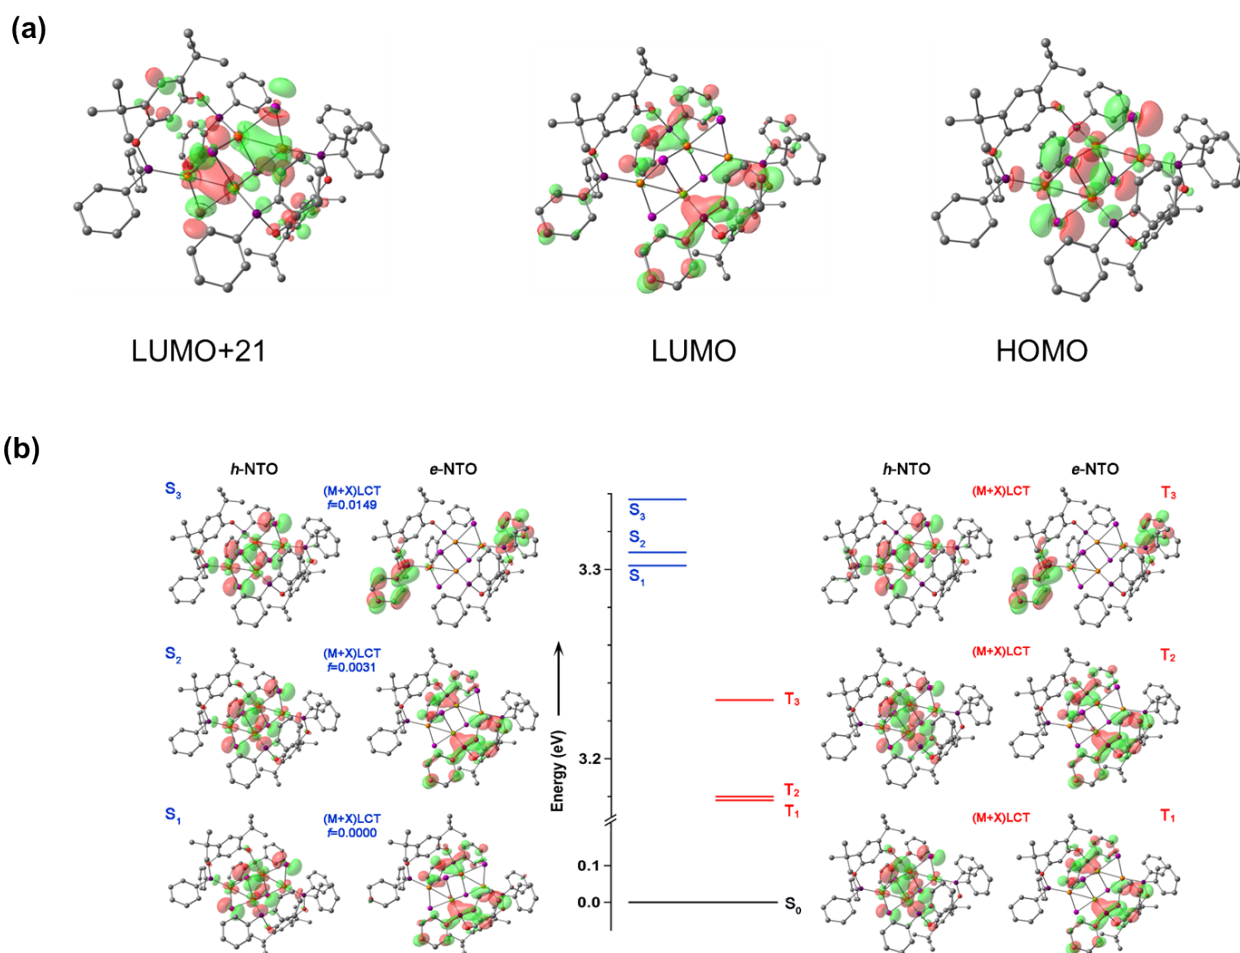

Figure S56. (a) MOs of complex 4 in the ground state; (b) NTO analysis for complex 4.



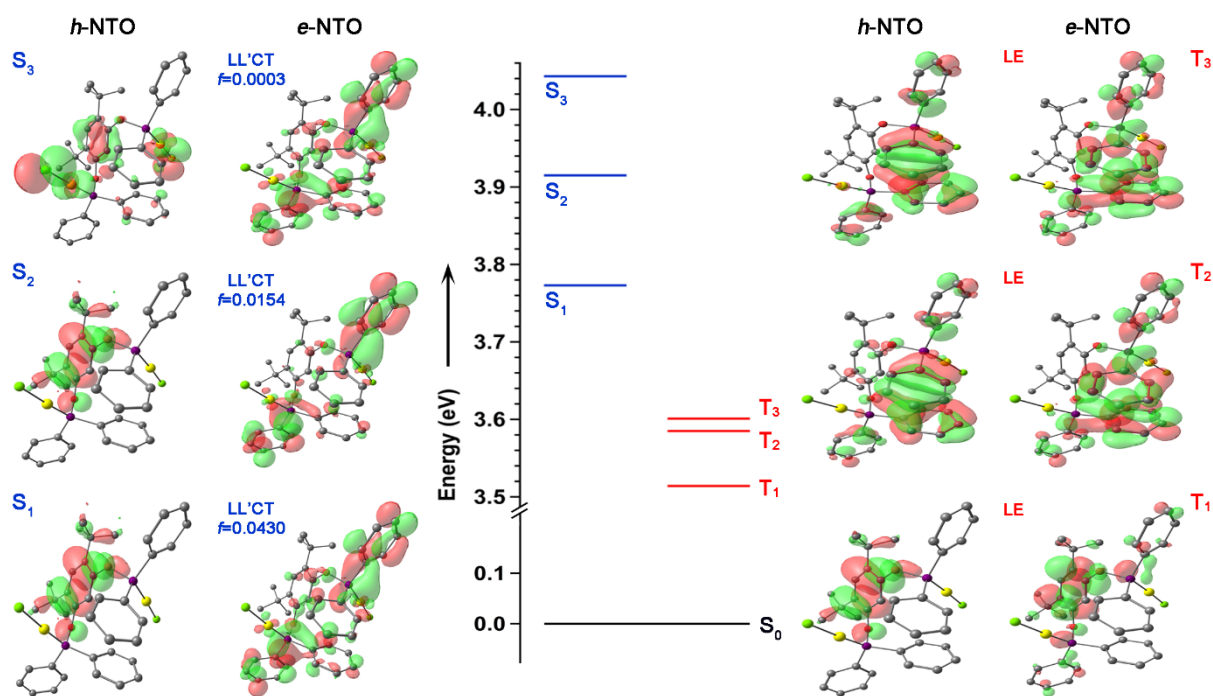

Figure S59. NTO analysis for complex 11.

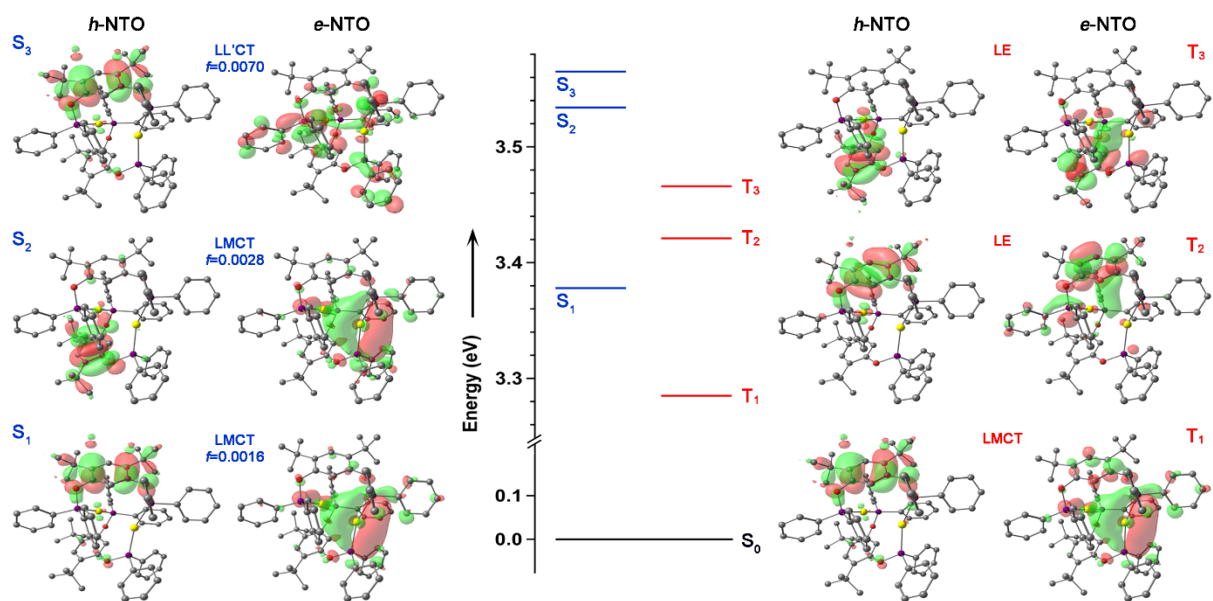

Figure S60. NTO analysis for complex 12.

**Table S1.** Spin-orbit coupling (SOC) values for complexes **2-4** in  $\text{cm}^{-1}$ 

|                                    | <b>2</b> | <b>3</b> | <b>4</b> |
|------------------------------------|----------|----------|----------|
| <b>S<sub>0</sub>-T<sub>1</sub></b> | 26.27527 | 1.01734  | 1.00089  |
| <b>S<sub>0</sub>-T<sub>2</sub></b> | 100.0052 | 97.57894 | 73.17875 |
| <b>S<sub>0</sub>-T<sub>3</sub></b> | 34.08661 | 0.46184  | 1.40215  |
| <b>S<sub>1</sub>-T<sub>1</sub></b> | 6.68691  | 14.55867 | 0.13333  |
| <b>S<sub>1</sub>-T<sub>2</sub></b> | 4.73363  | 0.16354  | 5.42224  |
| <b>S<sub>1</sub>-T<sub>3</sub></b> | 7.21313  | 14.94565 | 0.07077  |
| <b>S<sub>2</sub>-T<sub>1</sub></b> | 4.06299  | 0.16193  | 7.58012  |
| <b>S<sub>2</sub>-T<sub>2</sub></b> | 7.65177  | 16.99998 | 0.15399  |
| <b>S<sub>2</sub>-T<sub>3</sub></b> | 4.42956  | 0.142    | 8.11849  |
| <b>S<sub>3</sub>-T<sub>1</sub></b> | 9.03803  | 12.19809 | 3.38845  |
| <b>S<sub>3</sub>-T<sub>2</sub></b> | 8.60884  | 0.46646  | 0.06677  |
| <b>S<sub>3</sub>-T<sub>3</sub></b> | 12.77628 | 7.99878  | 5.87418  |

**Table S2.** Excitation energies and oscillator strengths of emission properties

| <b>Complex number</b> | <b>Excited state</b> | <b>Excitation involved</b> | <b>Oscillator strength</b> |
|-----------------------|----------------------|----------------------------|----------------------------|
| <b>2</b>              | S <sub>1</sub>       | (M+X)LCT                   | f=0.0005                   |
|                       | S <sub>2</sub>       | (M+X)LCT                   | f=0.0110                   |
|                       | S <sub>3</sub>       | (M+X)LCT                   | f=0.0448                   |
|                       | T <sub>1</sub>       | (M+X)LCT                   | f=0.0000                   |
|                       | T <sub>2</sub>       | (M+X)LCT                   | f=0.0000                   |
|                       | T <sub>3</sub>       | (M+X)LCT                   | f=0.0000                   |
| <b>3</b>              | S <sub>1</sub>       | (M+X)LCT                   | f=0.0075                   |
|                       | S <sub>2</sub>       | (M+X)LCT                   | f=0.0000                   |
|                       | S <sub>3</sub>       | (M+X)LCT                   | f=0.0157                   |
|                       | T <sub>1</sub>       | (M+X)LCT                   | f=0.0000                   |
|                       | T <sub>2</sub>       | (M+X)LCT                   | f=0.0000                   |
|                       | T <sub>3</sub>       | (M+X)LCT                   | f=0.0000                   |
| <b>4</b>              | S <sub>1</sub>       | (M+X)LCT                   | f=0.0000                   |
|                       | S <sub>2</sub>       | (M+X)LCT                   | f=0.0031                   |
|                       | S <sub>3</sub>       | (M+X)LCT                   | f=0.0149                   |



|           |                |          |          |
|-----------|----------------|----------|----------|
|           | T <sub>1</sub> | (M+X)LCT | f=0.0000 |
|           | T <sub>2</sub> | (M+X)LCT | f=0.0000 |
|           | T <sub>3</sub> | (M+X)LCT | f=0.0000 |
| <b>6</b>  | S <sub>1</sub> | MLCT     | f=0.0529 |
|           | S <sub>2</sub> | MLCT     | f=0.0000 |
|           | S <sub>3</sub> | MLCT     | f=0.0528 |
|           | T <sub>1</sub> | MLCT     | f=0.0000 |
|           | T <sub>2</sub> | MLCT     | f=0.0000 |
|           | T <sub>3</sub> | MLCT     | f=0.0000 |
| <b>7</b>  | S <sub>1</sub> | MLCT     | f=0.0056 |
|           | S <sub>2</sub> | LE       | f=0.0018 |
|           | S <sub>3</sub> | MLCT     | f=0.0506 |
|           | T <sub>1</sub> | MLCT     | f=0.0000 |
|           | T <sub>2</sub> | LE       | f=0.0000 |
|           | T <sub>3</sub> | LMCT     | f=0.0000 |
| <b>11</b> | S <sub>1</sub> | LL'CT    | f=0.0430 |
|           | S <sub>2</sub> | LL'CT    | f=0.0154 |
|           | S <sub>3</sub> | LL'CT    | f=0.0003 |
|           | T <sub>1</sub> | LE       | f=0.0000 |
|           | T <sub>2</sub> | LE       | f=0.0000 |
|           | T <sub>3</sub> | LE       | f=0.0000 |
| <b>12</b> | S <sub>1</sub> | LMCT     | f=0.0016 |
|           | S <sub>2</sub> | LMCT     | f=0.0028 |
|           | S <sub>3</sub> | LL'CT    | f=0.0070 |
|           | T <sub>1</sub> | LMCT     | f=0.0000 |
|           | T <sub>2</sub> | LE       | f=0.0000 |
|           | T <sub>3</sub> | LE       | f=0.0000 |

## References

1. R. B. Bedford, M. Betham, M. E. Blake, S. J. Coles, S. M. Draper, M. B. Hursthouse and P. N. Scully, *Inorganica Chim. Acta*, 2006, **359**, 1870-1878.

2. O. V. Dolomanov, L. J. Bourhis, R. J. Gildea, J. A. K. Howard and H. Puschmann, *J. Appl. Crystallogr.*, 2009, **42**, 339-341.
3. G. M. Sheldrick, *Acta Crystallogr. C Struct.*, 2015, **71**, 3-8.
4. A. L. Spek, *J. Appl. Crystallogr.*, 2003, **36**, 7-13.
5. M. J. Frisch, G. W. Trucks, H. B. Schlegel, G. E. Scuseria, M. A. Robb, J. R. Cheeseman, G. Scalmani, V. Barone, B. Mennucci, G. A. Petersson, H. Nakatsuji, M. Caricato, X. H. Li, H. P., A. F. B. Izmaylov, J., G. Zheng, J. L. Sonnenberg, M. Hada, M. Ehara, K. Toyota, R. Fukuda, J. Hasegawa, M. Ishida, T. Nakajima, Y. Honda, O. Kitao, H. Nakai, T. Vreven, J. Montgomery, J. A., J. E. Peralta, F. Ogliaro, M. Bearpark, J. J. Heyd, E. Brothers, K. N. Kudin, V. N. Staroverov, R. Kobayashi, J. Normand, K. Raghavachari, A. Rendell, J. C. Burant, S. S. Iyengar, J. Tomasi, M. Cossi, N. Rega, N. J. Millam, M. Klene, J. E. Knox, J. B. Cross, V. Bakken, C. Adamo, J. Jaramillo, R. Gomperts, R. E. Stratmann, O. Yazyev, A. J. Austin, R. Cammi, C. Pomelli, J. W. Ochterski, R. L. Martin, K. Morokuma, V. G. Zakrzewski, G. A. Voth, P. Salvador, J. J. Dannenberg, S. Dapprich, A. D. Daniels, Ö. Farkas, J. B. Foresman, J. V. Ortiz, J. Cioslowski and D. J. Fox, *Revision D.01, Gaussian, Inc., Wallingford CT (2009)*.
